# Supplementary material
Source: PubMed Central journal article supplement (PMC3149825)
Supplement: NIHMS251484-supplement-Quantitative_proteomics_analyses_Supp1.pdf [file NIHMS251484-supplement-Quantitative_proteomics_analyses_Supp1.pdf]

**Figure S1. Representative tandem mass spectra annotated with masses observed and fragment assignments for the quantitated proteins which were identified with only one peptide.**

| Gene Symbol                                | Sequences                     | m/z     | Charge | Ion score | Expect  |
|--------------------------------------------|-------------------------------|---------|--------|-----------|---------|
| BASP1                                      | AQGPAASAEEPKPVEAPAANSQTQVTVKE | 970.155 | 3+     | 79        | 1.6e-06 |
| (IPI00299024 Brain acid soluble protein 1) |                               |         |        |           |         |

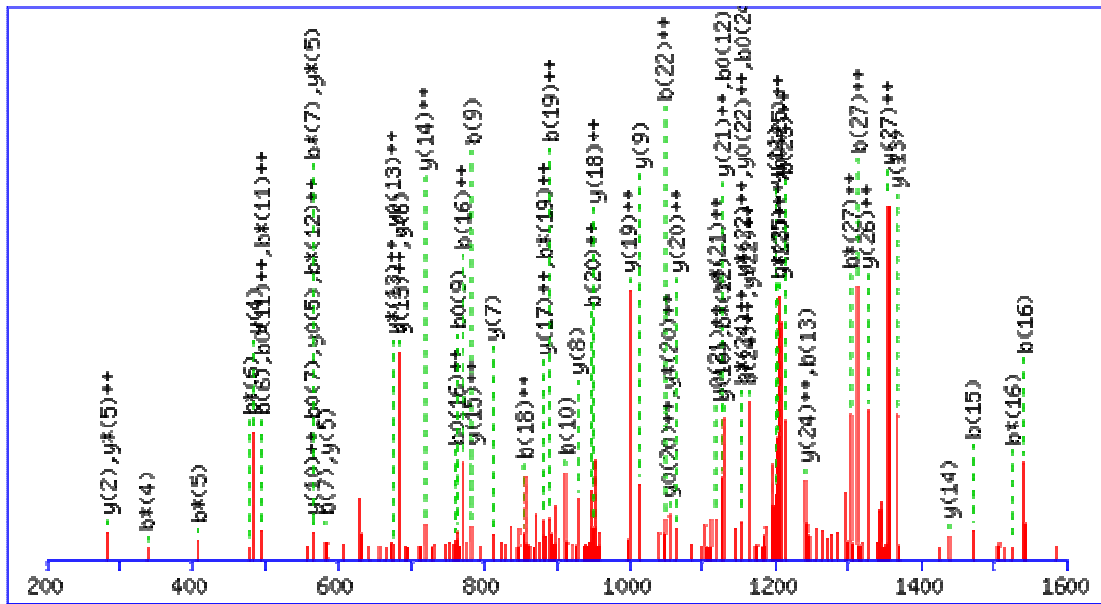

K12, K28: Lysine (K-full)

| #  | b       | b <sup>++</sup> | b <sup>*</sup> | b <sup>+++</sup> | b <sup>0</sup> | b <sup>0++</sup> | Seq. | y       | y <sup>++</sup> | y <sup>*</sup> | y <sup>+++</sup> | y <sup>0</sup> | y <sup>0++</sup> | #  |
|----|---------|-----------------|----------------|------------------|----------------|------------------|------|---------|-----------------|----------------|------------------|----------------|------------------|----|
| 1  | 72.04   | 36.53           |                |                  |                |                  | A    |         |                 |                |                  |                |                  | 29 |
| 2  | 200.10  | 100.56          | 183.08         | 92.04            |                |                  | Q    | 2837.41 | 1419.21         | 2820.39        | 1410.70          | 2819.40        | 1410.21          | 28 |
| 3  | 257.12  | 129.07          | 240.10         | 120.55           |                |                  | G    | 2709.35 | 1355.18         | 2692.33        | 1346.67          | 2691.34        | 1346.18          | 27 |
| 4  | 354.18  | 177.59          | 337.15         | 169.08           |                |                  | P    | 2652.33 | 1326.67         | 2635.31        | 1318.16          | 2634.32        | 1317.67          | 26 |
| 5  | 425.21  | 213.11          | 408.19         | 204.60           |                |                  | A    | 2555.28 | 1278.14         | 2538.25        | 1269.63          | 2537.27        | 1269.14          | 25 |
| 6  | 496.25  | 248.63          | 479.22         | 240.12           |                |                  | A    | 2484.24 | 1242.63         | 2467.22        | 1234.11          | 2466.23        | 1233.62          | 24 |
| 7  | 583.28  | 292.15          | 566.26         | 283.63           | 565.27         | 283.14           | S    | 2413.21 | 1207.11         | 2396.18        | 1198.59          | 2395.20        | 1198.10          | 23 |
| 8  | 654.32  | 327.66          | 637.29         | 319.15           | 636.31         | 318.66           | A    | 2326.17 | 1163.59         | 2309.15        | 1155.08          | 2308.16        | 1154.59          | 22 |
| 9  | 783.36  | 392.19          | 766.34         | 383.67           | 765.35         | 383.18           | E    | 2255.14 | 1128.07         | 2238.11        | 1119.56          | 2237.13        | 1119.07          | 21 |
| 10 | 912.41  | 456.71          | 895.38         | 448.19           | 894.40         | 447.70           | E    | 2126.09 | 1063.55         | 2109.07        | 1055.04          | 2108.08        | 1054.55          | 20 |
| 11 | 1009.46 | 505.23          | 992.43         | 496.72           | 991.45         | 496.23           | P    | 1997.05 | 999.03          | 1980.03        | 990.52           | 1979.04        | 990.02           | 19 |
| 12 | 1145.57 | 573.29          | 1128.54        | 564.77           | 1127.56        | 564.28           | K    | 1900.00 | 950.50          | 1882.97        | 941.99           | 1881.99        | 941.50           | 18 |
| 13 | 1242.62 | 621.81          | 1225.59        | 613.30           | 1224.61        | 612.81           | P    | 1763.89 | 882.45          | 1746.86        | 873.94           | 1745.88        | 873.44           | 17 |
| 14 | 1341.69 | 671.35          | 1324.66        | 662.83           | 1323.68        | 662.34           | V    | 1666.84 | 833.92          | 1649.81        | 825.41           | 1648.83        | 824.92           | 16 |
| 15 | 1470.73 | 735.87          | 1453.70        | 727.36           | 1452.72        | 726.86           | E    | 1567.77 | 784.39          | 1550.74        | 775.87           | 1549.76        | 775.38           | 15 |
| 16 | 1541.77 | 771.39          | 1524.74        | 762.87           | 1523.76        | 762.38           | A    | 1438.73 | 719.87          | 1421.70        | 711.35           | 1420.72        | 710.86           | 14 |
| 17 | 1638.82 | 819.91          | 1621.79        | 811.40           | 1620.81        | 810.91           | P    | 1367.69 | 684.35          | 1350.66        | 675.83           | 1349.68        | 675.34           | 13 |
| 18 | 1709.86 | 855.43          | 1692.83        | 846.92           | 1691.85        | 846.43           | A    | 1270.64 | 635.82          | 1253.61        | 627.31           | 1252.63        | 626.82           | 12 |
| 19 | 1780.90 | 890.95          | 1763.87        | 882.44           | 1762.88        | 881.95           | A    | 1199.60 | 600.30          | 1182.57        | 591.79           | 1181.59        | 591.30           | 11 |
| 20 | 1894.94 | 947.97          | 1877.91        | 939.46           | 1876.93        | 938.97           | N    | 1128.56 | 564.78          | 1111.54        | 556.27           | 1110.55        | 555.78           | 10 |
| 21 | 1981.97 | 991.49          | 1964.94        | 982.98           | 1963.96        | 982.48           | S    | 1014.52 | 507.76          | 997.49         | 499.25           | 996.51         | 498.76           | 9  |
| 22 | 2097.00 | 1049.00         | 2079.97        | 1040.49          | 2078.99        | 1040.00          | D    | 927.49  | 464.25          | 910.46         | 455.73           | 909.48         | 455.24           | 8  |
| 23 | 2225.06 | 1113.03         | 2208.03        | 1104.52          | 2207.05        | 1104.03          | Q    | 812.46  | 406.73          | 795.43         | 398.22           | 794.45         | 397.73           | 7  |
| 24 | 2326.10 | 1163.56         | 2309.08        | 1155.04          | 2308.09        | 1154.55          | T    | 684.40  | 342.70          | 667.38         | 334.19           | 666.39         | 333.70           | 6  |
| 25 | 2425.17 | 1213.09         | 2408.15        | 1204.58          | 2407.16        | 1204.08          | V    | 583.35  | 292.18          | 566.33         | 283.67           | 565.34         | 283.18           | 5  |
| 26 | 2526.22 | 1263.61         | 2509.19        | 1255.10          | 2508.21        | 1254.61          | T    | 484.29  | 242.65          | 467.26         | 234.13           | 466.28         | 233.64           | 4  |
| 27 | 2625.29 | 1313.15         | 2608.26        | 1304.63          | 2607.28        | 1304.14          | V    | 383.24  | 192.12          | 366.21         | 183.61           | 365.23         | 183.12           | 3  |
| 28 | 2761.40 | 1381.20         | 2744.37        | 1372.69          | 2743.39        | 1372.20          | K    | 284.17  | 142.59          | 267.14         | 134.08           | 266.16         | 133.58           | 2  |
| 29 |         |                 |                |                  |                |                  | E    | 148.06  | 74.53           |                |                  | 130.05         | 65.53            | 1  |

Gene Symbol Sequences m/z Charge Ion score Expect  
 C14orf142 MELLGEYVQGEGKPQKLR 712.037 3+ 45 0.0048  
 (IPI00646167 hypothetical protein LOC84520)

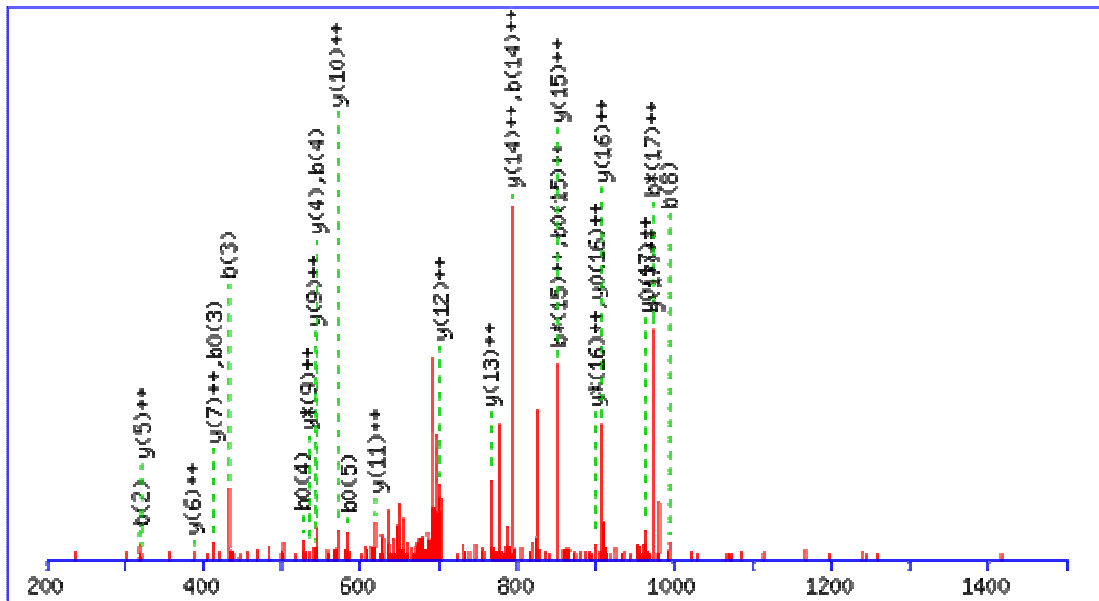

N-term: N-Acetyl (Protein)  
 M1: Oxidation (M)  
 Q15: Deamidation (NQ)

| #  | b             | b <sup>++</sup> | b <sup>*</sup> | b <sup>*++</sup> | b <sup>0</sup> | b <sup>0++</sup> | Seq. | y             | y <sup>++</sup> | y <sup>*</sup> | y <sup>*++</sup> | y <sup>0</sup> | y <sup>0++</sup> | #  |
|----|---------------|-----------------|----------------|------------------|----------------|------------------|------|---------------|-----------------|----------------|------------------|----------------|------------------|----|
| 1  | 190.05        | 95.53           |                |                  |                |                  | M    |               |                 |                |                  |                |                  | 18 |
| 2  | <b>319.10</b> | 160.05          |                |                  | 301.09         | 151.05           | E    | 1945.04       | <b>973.02</b>   | 1928.01        | 964.51           | 1927.03        | <b>964.02</b>    | 17 |
| 3  | <b>432.18</b> | 216.59          |                |                  | <b>414.17</b>  | 207.59           | L    | 1816.00       | <b>908.50</b>   | 1798.97        | <b>899.99</b>    | 1797.99        | <b>899.50</b>    | 16 |
| 4  | <b>545.26</b> | 273.14          |                |                  | <b>527.25</b>  | 264.13           | L    | 1702.91       | <b>851.96</b>   | 1685.89        | 843.45           | 1684.90        | 842.95           | 15 |
| 5  | 602.29        | 301.65          |                |                  | <b>584.27</b>  | 292.64           | G    | 1589.83       | <b>795.42</b>   | 1572.80        | 786.90           | 1571.82        | 786.41           | 14 |
| 6  | 731.33        | 366.17          |                |                  | 713.32         | 357.16           | E    | 1532.81       | <b>766.91</b>   | 1515.78        | 758.39           | 1514.80        | 757.90           | 13 |
| 7  | 894.39        | 447.70          |                |                  | 876.38         | 438.69           | Y    | 1403.76       | <b>702.39</b>   | 1386.74        | 693.87           | 1385.75        | 693.38           | 12 |
| 8  | <b>993.46</b> | 497.23          |                |                  | 975.45         | 488.23           | V    | 1240.70       | <b>620.85</b>   | 1223.67        | 612.34           | 1222.69        | 611.85           | 11 |
| 9  | 1050.48       | 525.74          |                |                  | 1032.47        | 516.74           | G    | 1141.63       | <b>571.32</b>   | 1124.61        | 562.81           | 1123.62        | 562.31           | 10 |
| 10 | 1178.54       | 589.77          | 1161.51        | 581.26           | 1160.53        | 580.77           | Q    | 1084.61       | <b>542.81</b>   | 1067.58        | <b>534.30</b>    | 1066.60        | 533.80           | 9  |
| 11 | 1307.58       | 654.29          | 1290.56        | 645.78           | 1289.57        | 645.29           | E    | 956.55        | 478.78          | 939.53         | 470.27           | 938.54         | 469.77           | 8  |
| 12 | 1364.60       | 682.81          | 1347.58        | 674.29           | 1346.59        | 673.80           | G    | 827.51        | <b>414.26</b>   | 810.48         | 405.75           |                |                  | 7  |
| 13 | 1492.70       | 746.85          | 1475.67        | 738.34           | 1474.69        | 737.85           | K    | 770.49        | <b>385.75</b>   | 753.46         | 377.23           |                |                  | 6  |
| 14 | 1589.75       | <b>795.38</b>   | 1572.72        | 786.87           | 1571.74        | 786.37           | P    | 642.39        | <b>321.70</b>   | 625.37         | 313.19           |                |                  | 5  |
| 15 | 1718.79       | 859.90          | 1701.77        | <b>851.39</b>    | 1700.78        | <b>850.90</b>    | Q    | <b>545.34</b> | 273.17          | 528.31         | 264.66           |                |                  | 4  |
| 16 | 1846.89       | 923.95          | 1829.86        | 915.43           | 1828.88        | 914.94           | K    | 416.30        | 208.65          | 399.27         | 200.14           |                |                  | 3  |
| 17 | 1959.97       | 980.49          | 1942.95        | <b>971.98</b>    | 1941.96        | 971.48           | L    | 288.20        | 144.61          | 271.18         | 136.09           |                |                  | 2  |
| 18 |               |                 |                |                  |                |                  | R    | 175.12        | 88.06           | 158.09         | 79.55            |                |                  | 1  |

**Gene Symbol**                      **Sequences**                      **m/z**    **Charge**    **Ion score**    **Expect**  
 C14orf32                      SDEFSLADALPEHSPAK    932.450    2+            91            1.2e-07  
 (IPI00171527 Uncharacterized protein C14orf32)

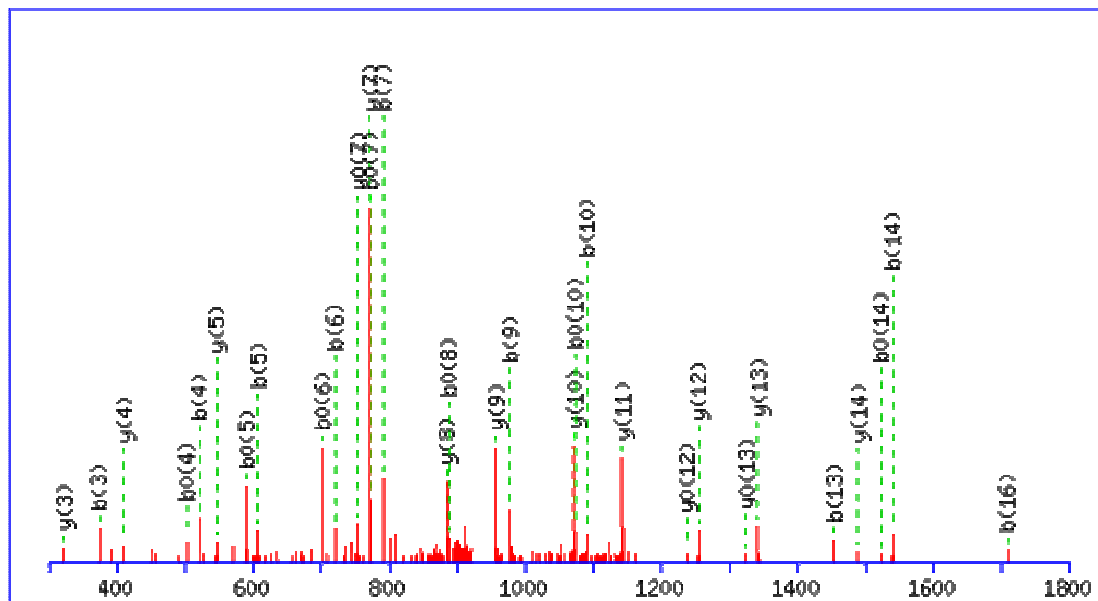

N-term : N-Acetyl (Protein)

K17: Lysine (K-full)

| #  | b              | b <sup>++</sup> | b <sup>0</sup> | b <sup>0++</sup> | Seq. | y              | y <sup>++</sup> | y <sup>*</sup> | y <sup>*++</sup> | y <sup>0</sup> | y <sup>0++</sup> | #  |
|----|----------------|-----------------|----------------|------------------|------|----------------|-----------------|----------------|------------------|----------------|------------------|----|
| 1  | 130.05         | 65.53           | 112.04         | 56.52            | S    |                |                 |                |                  |                |                  | 17 |
| 2  | 245.08         | 123.04          | 227.07         | 114.04           | D    | 1734.84        | 867.92          | 1717.82        | 859.41           | 1716.83        | 858.92           | 16 |
| 3  | <b>374.12</b>  | 187.56          | 356.11         | 178.56           | E    | 1619.82        | 810.41          | 1602.79        | 801.90           | 1601.80        | 801.41           | 15 |
| 4  | <b>521.19</b>  | 261.10          | <b>503.18</b>  | 252.09           | F    | <b>1490.77</b> | 745.89          | 1473.75        | 737.38           | 1472.76        | 736.88           | 14 |
| 5  | <b>608.22</b>  | 304.61          | <b>590.21</b>  | 295.61           | S    | <b>1343.70</b> | 672.36          | 1326.68        | 663.84           | <b>1325.69</b> | 663.35           | 13 |
| 6  | <b>721.30</b>  | 361.16          | <b>703.29</b>  | 352.15           | L    | <b>1256.67</b> | 628.84          | 1239.65        | 620.33           | <b>1238.66</b> | 619.83           | 12 |
| 7  | <b>792.34</b>  | 396.67          | <b>774.33</b>  | 387.67           | A    | <b>1143.59</b> | 572.30          | 1126.56        | 563.78           | 1125.58        | 563.29           | 11 |
| 8  | 907.37         | 454.19          | <b>889.36</b>  | 445.18           | D    | <b>1072.55</b> | 536.78          | 1055.52        | 528.27           | 1054.54        | 527.77           | 10 |
| 9  | <b>978.41</b>  | 489.71          | 960.39         | 480.70           | A    | <b>957.52</b>  | 479.27          | 940.50         | 470.75           | 939.51         | 470.26           | 9  |
| 10 | <b>1091.49</b> | 546.25          | <b>1073.48</b> | 537.24           | L    | <b>886.49</b>  | 443.75          | 869.46         | 435.23           | 868.48         | 434.74           | 8  |
| 11 | 1188.54        | 594.77          | 1170.53        | 585.77           | P    | <b>773.40</b>  | 387.21          | 756.38         | 378.69           | <b>755.39</b>  | 378.20           | 7  |
| 12 | 1317.58        | 659.30          | 1299.57        | 650.29           | E    | 676.35         | 338.68          | 659.32         | 330.17           | 658.34         | 329.67           | 6  |
| 13 | <b>1454.64</b> | 727.83          | 1436.63        | 718.82           | H    | <b>547.31</b>  | 274.16          | 530.28         | 265.64           | 529.30         | 265.15           | 5  |
| 14 | <b>1541.68</b> | 771.34          | <b>1523.66</b> | 762.34           | S    | <b>410.25</b>  | 205.63          | 393.22         | 197.11           | 392.24         | 196.62           | 4  |
| 15 | 1638.73        | 819.87          | 1620.72        | 810.86           | P    | <b>323.22</b>  | 162.11          | 306.19         | 153.60           |                |                  | 3  |
| 16 | <b>1709.77</b> | 855.39          | 1691.75        | 846.38           | A    | 226.16         | 113.59          | 209.14         | 105.07           |                |                  | 2  |
| 17 |                |                 |                |                  | K    | 155.13         | 78.07           | 138.10         | 69.55            |                |                  | 1  |

Gene Symbol Sequences m/z Charge Ion score Expect  
 C9orf32 TSEVIEDEKQFYSK 880.933 2+ 83 8.5e-07  
 (IPI00515040 Chromosome 9 open reading frame 32)

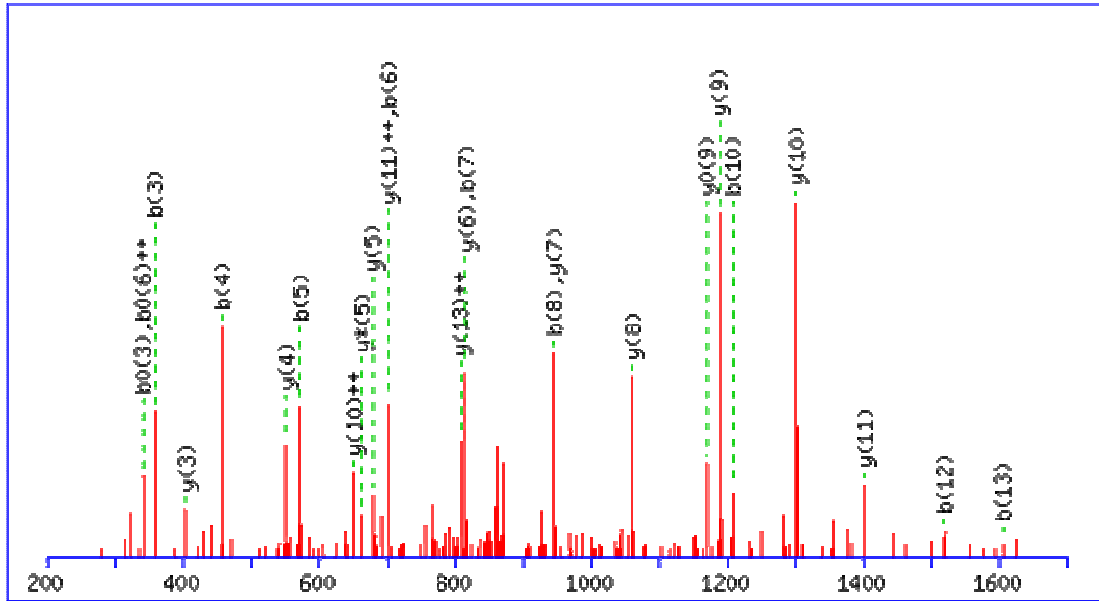

N-term : N-Acetyl (Protein)  
 K9, K14: Lysine (K-full)

| #  | b       | b <sup>++</sup> | b <sup>*</sup> | b <sup>+++</sup> | b <sup>0</sup> | b <sup>0++</sup> | Seq. | y       | y <sup>++</sup> | y <sup>*</sup> | y <sup>+++</sup> | y <sup>0</sup> | y <sup>0++</sup> | #  |
|----|---------|-----------------|----------------|------------------|----------------|------------------|------|---------|-----------------|----------------|------------------|----------------|------------------|----|
| 1  | 144.07  | 72.54           |                |                  | 126.05         | 63.53            | T    |         |                 |                |                  |                |                  | 14 |
| 2  | 231.10  | 116.05          |                |                  | 213.09         | 107.05           | S    | 1617.80 | 809.40          | 1600.77        | 800.89           | 1599.79        | 800.40           | 13 |
| 3  | 360.14  | 180.57          |                |                  | 342.13         | 171.57           | E    | 1530.77 | 765.89          | 1513.74        | 757.37           | 1512.76        | 756.88           | 12 |
| 4  | 459.21  | 230.11          |                |                  | 441.20         | 221.10           | V    | 1401.72 | 701.37          | 1384.70        | 692.85           | 1383.71        | 692.36           | 11 |
| 5  | 572.29  | 286.65          |                |                  | 554.28         | 277.64           | I    | 1302.65 | 651.83          | 1285.63        | 643.32           | 1284.64        | 642.83           | 10 |
| 6  | 701.34  | 351.17          |                |                  | 683.32         | 342.17           | E    | 1189.57 | 595.29          | 1172.54        | 586.78           | 1171.56        | 586.28           | 9  |
| 7  | 816.36  | 408.68          |                |                  | 798.35         | 399.68           | D    | 1060.53 | 530.77          | 1043.50        | 522.25           | 1042.52        | 521.76           | 8  |
| 8  | 945.40  | 473.21          |                |                  | 927.39         | 464.20           | E    | 945.50  | 473.25          | 928.47         | 464.74           | 927.49         | 464.25           | 7  |
| 9  | 1081.51 | 541.26          | 1064.49        | 532.75           | 1063.50        | 532.26           | K    | 816.46  | 408.73          | 799.43         | 400.22           | 798.45         | 399.73           | 6  |
| 10 | 1209.57 | 605.29          | 1192.55        | 596.78           | 1191.56        | 596.28           | Q    | 680.35  | 340.68          | 663.32         | 332.17           | 662.34         | 331.67           | 5  |
| 11 | 1356.64 | 678.82          | 1339.61        | 670.31           | 1338.63        | 669.82           | F    | 552.29  | 276.65          | 535.26         | 268.14           | 534.28         | 267.64           | 4  |
| 12 | 1519.70 | 760.36          | 1502.68        | 751.84           | 1501.69        | 751.35           | Y    | 405.22  | 203.11          | 388.20         | 194.60           | 387.21         | 194.11           | 3  |
| 13 | 1606.74 | 803.87          | 1589.71        | 795.36           | 1588.73        | 794.87           | S    | 242.16  | 121.58          | 225.13         | 113.07           | 224.15         | 112.58           | 2  |
| 14 |         |                 |                |                  |                |                  | K    | 155.13  | 78.07           | 138.10         | 69.55            |                |                  | 1  |

Gene Symbol Sequences m/z Charge Ion score Expect  
 CLTB LQELDAASKVTEQEWK 955.994 2+ 89 1.9e-07  
 (IPI00014589 Isoform Brain of Clathrin light chain B)

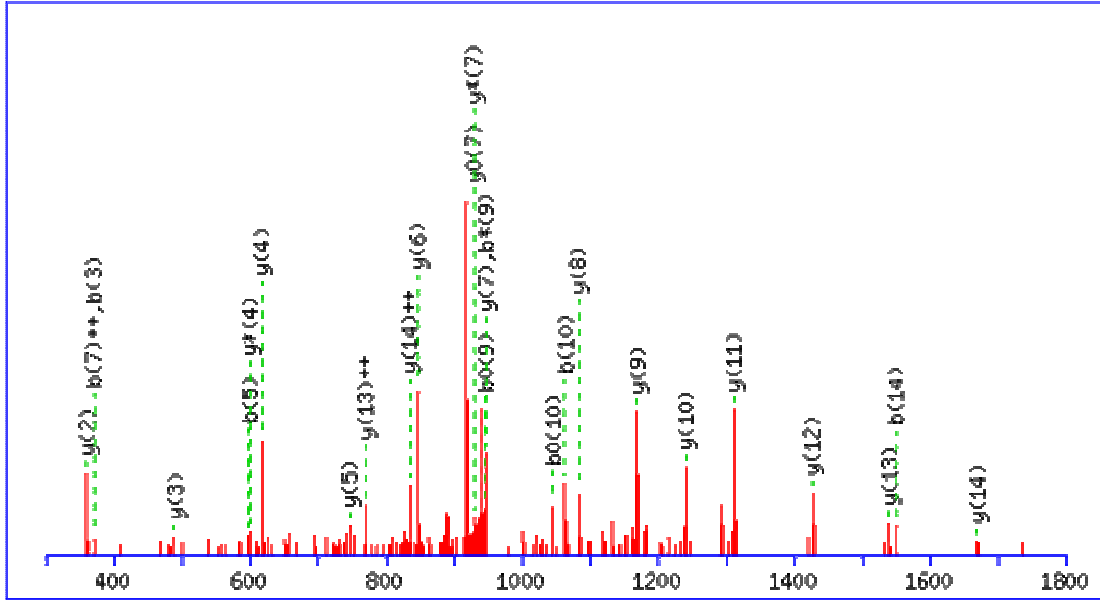

K9: Lysine (K-full)

| #  | b              | b <sup>++</sup> | b <sup>*</sup> | b <sup>*++</sup> | b <sup>0</sup> | b <sup>0++</sup> | Seq. | y              | y <sup>++</sup> | y <sup>*</sup> | y <sup>*++</sup> | y <sup>0</sup> | y <sup>0++</sup> | #  |
|----|----------------|-----------------|----------------|------------------|----------------|------------------|------|----------------|-----------------|----------------|------------------|----------------|------------------|----|
| 1  | 114.09         | 57.55           |                |                  |                |                  | L    |                |                 |                |                  |                |                  | 16 |
| 2  | 242.15         | 121.58          | 225.12         | 113.07           |                |                  | Q    | 1797.89        | 899.45          | 1780.86        | 890.93           | 1779.88        | 890.44           | 15 |
| 3  | <b>371.19</b>  | 186.10          | 354.17         | 177.59           | 353.18         | 177.09           | E    | <b>1669.83</b> | <b>835.42</b>   | 1652.80        | 826.90           | 1651.82        | 826.41           | 14 |
| 4  | 484.28         | 242.64          | 467.25         | 234.13           | 466.27         | 233.64           | L    | <b>1540.78</b> | <b>770.90</b>   | 1523.76        | 762.38           | 1522.77        | 761.89           | 13 |
| 5  | <b>599.30</b>  | 300.16          | 582.28         | 291.64           | 581.29         | 291.15           | D    | <b>1427.70</b> | 714.35          | 1410.67        | 705.84           | 1409.69        | 705.35           | 12 |
| 6  | 670.34         | 335.67          | 653.31         | 327.16           | 652.33         | 326.67           | A    | <b>1312.67</b> | 656.84          | 1295.65        | 648.33           | 1294.66        | 647.84           | 11 |
| 7  | 741.38         | <b>371.19</b>   | 724.35         | 362.68           | 723.37         | 362.19           | A    | <b>1241.64</b> | 621.32          | 1224.61        | 612.81           | 1223.63        | 612.32           | 10 |
| 8  | 828.41         | 414.71          | 811.38         | 406.20           | 810.40         | 405.70           | S    | <b>1170.60</b> | 585.80          | 1153.57        | 577.29           | 1152.59        | 576.80           | 9  |
| 9  | 964.52         | 482.76          | <b>947.49</b>  | 474.25           | <b>946.51</b>  | 473.76           | K    | <b>1083.57</b> | 542.29          | 1066.54        | 533.77           | 1065.56        | 533.28           | 8  |
| 10 | <b>1063.59</b> | 532.30          | 1046.56        | 523.78           | <b>1045.58</b> | 523.29           | V    | <b>947.46</b>  | 474.23          | <b>930.43</b>  | 465.72           | <b>929.45</b>  | 465.23           | 7  |
| 11 | 1164.64        | 582.82          | 1147.61        | 574.31           | 1146.62        | 573.82           | T    | <b>848.39</b>  | 424.70          | 831.36         | 416.19           | 830.38         | 415.69           | 6  |
| 12 | 1293.68        | 647.34          | 1276.65        | 638.83           | 1275.67        | 638.34           | E    | <b>747.34</b>  | 374.17          | 730.32         | 365.66           | 729.33         | 365.17           | 5  |
| 13 | 1421.74        | 711.37          | 1404.71        | 702.86           | 1403.73        | 702.37           | Q    | <b>618.30</b>  | 309.65          | <b>601.27</b>  | 301.14           | 600.29         | 300.65           | 4  |
| 14 | <b>1550.78</b> | 775.89          | 1533.75        | 767.38           | 1532.77        | 766.89           | E    | <b>490.24</b>  | 245.62          | 473.21         | 237.11           | 472.23         | 236.62           | 3  |
| 15 | 1736.86        | 868.93          | 1719.83        | 860.42           | 1718.85        | 859.93           | W    | <b>361.20</b>  | 181.10          | 344.17         | 172.59           |                |                  | 2  |
| 16 |                |                 |                |                  |                |                  | R    | 175.12         | 88.06           | 158.09         | 79.55            |                |                  | 1  |

**Gene Symbol**      **Sequences**      **m/z**      **Charge**      **Ion score**      **Expect**  
 COX5B      KGLDPYNVLPK      657.871      2+      56      0.00023  
 (IPI00021785 Cytochrome c oxidase subunit 5B, mitochondrial precursor)

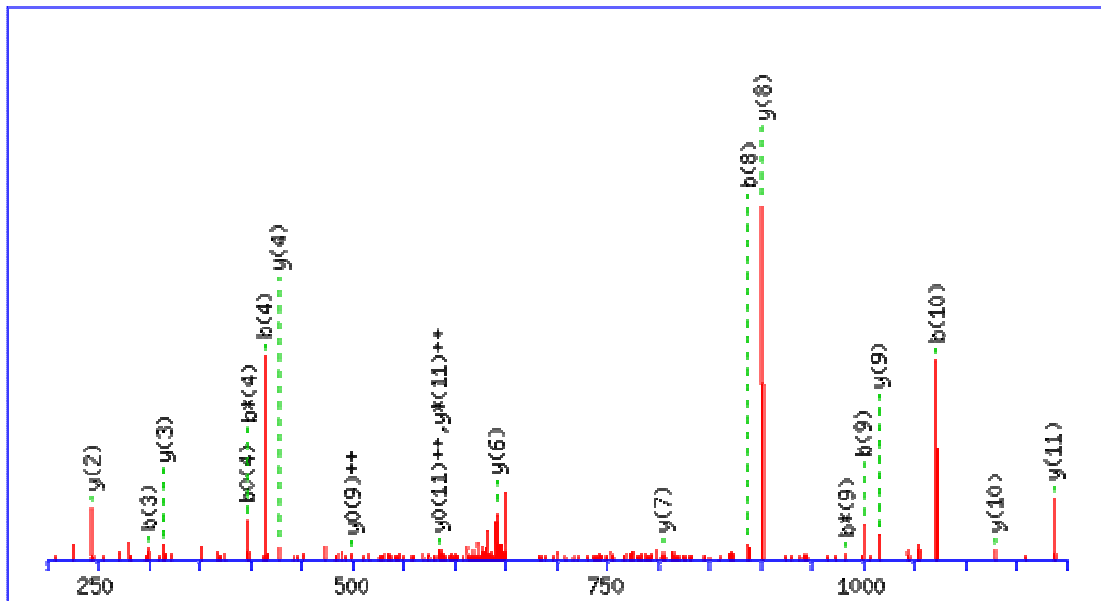

| #  | b       | b <sup>++</sup> | b <sup>*</sup> | b <sup>+++</sup> | b <sup>0</sup> | b <sup>0++</sup> | Seq. | y       | y <sup>++</sup> | y <sup>*</sup> | y <sup>+++</sup> | y <sup>0</sup> | y <sup>0++</sup> | #  |
|----|---------|-----------------|----------------|------------------|----------------|------------------|------|---------|-----------------|----------------|------------------|----------------|------------------|----|
| 1  | 129.10  | 65.05           | 112.08         | 56.54            |                |                  | K    |         |                 |                |                  |                |                  | 12 |
| 2  | 186.12  | 93.57           | 169.10         | 85.05            |                |                  | G    | 1186.65 | 593.83          | 1169.62        | 585.31           | 1168.64        | 584.82           | 11 |
| 3  | 299.21  | 150.11          | 282.18         | 141.59           |                |                  | L    | 1129.63 | 565.32          | 1112.60        | 556.80           | 1111.61        | 556.31           | 10 |
| 4  | 414.23  | 207.62          | 397.21         | 199.11           | 396.22         | 198.62           | D    | 1016.54 | 508.77          | 999.51         | 500.26           | 998.53         | 499.77           | 9  |
| 5  | 511.29  | 256.15          | 494.26         | 247.63           | 493.28         | 247.14           | P    | 901.51  | 451.26          | 884.49         | 442.75           |                |                  | 8  |
| 6  | 674.35  | 337.68          | 657.32         | 329.17           | 656.34         | 328.67           | Y    | 804.46  | 402.73          | 787.43         | 394.22           |                |                  | 7  |
| 7  | 788.39  | 394.70          | 771.37         | 386.19           | 770.38         | 385.70           | N    | 641.40  | 321.20          | 624.37         | 312.69           |                |                  | 6  |
| 8  | 887.46  | 444.23          | 870.44         | 435.72           | 869.45         | 435.23           | V    | 527.36  | 264.18          | 510.33         | 255.67           |                |                  | 5  |
| 9  | 1000.55 | 500.78          | 983.52         | 492.26           | 982.54         | 491.77           | L    | 428.29  | 214.65          | 411.26         | 206.13           |                |                  | 4  |
| 10 | 1071.58 | 536.30          | 1054.56        | 527.78           | 1053.57        | 527.29           | A    | 315.20  | 158.10          | 298.18         | 149.59           |                |                  | 3  |
| 11 | 1168.64 | 584.82          | 1151.61        | 576.31           | 1150.63        | 575.82           | P    | 244.17  | 122.59          | 227.14         | 114.07           |                |                  | 2  |
| 12 |         |                 |                |                  |                |                  | K    | 147.11  | 74.06           | 130.09         | 65.55            |                |                  | 1  |

**Gene Symbol**      **Sequences**      **m/z**      **Charge**      **Ion score**      **Expect**  
 DGKA      WGGGYEGQNLAK      640.306      2+      48      0.0018  
 (IPI00333143 Diacylglycerol kinase alpha)

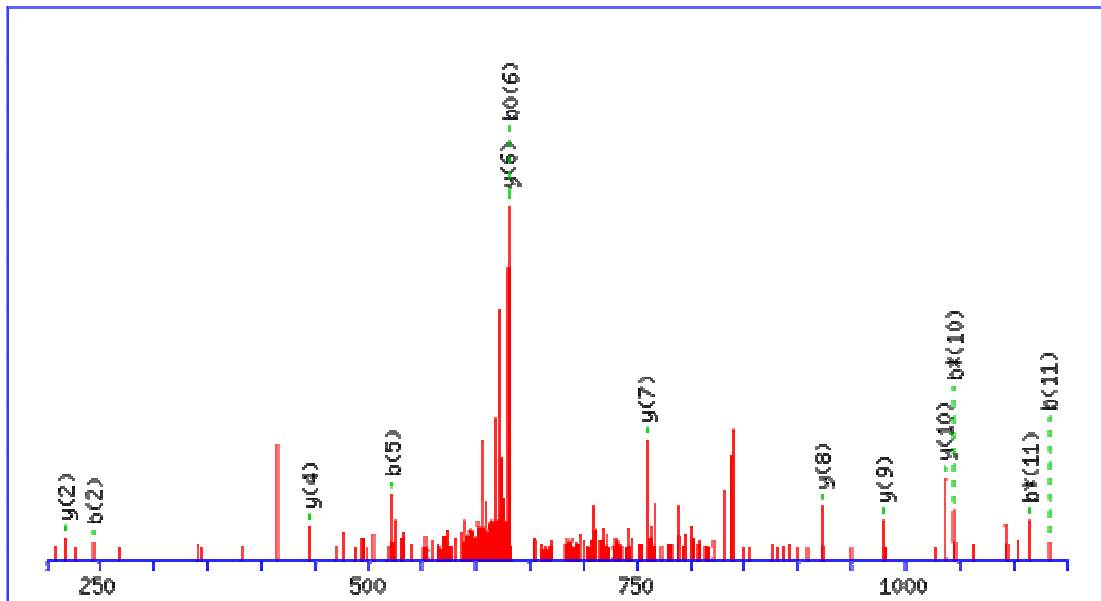

| #  | b       | b <sup>++</sup> | b <sup>*</sup> | b <sup>***</sup> | b <sup>0</sup> | b <sup>0++</sup> | Seq. | y       | y <sup>++</sup> | y <sup>*</sup> | y <sup>***</sup> | y <sup>0</sup> | y <sup>0++</sup> | #  |
|----|---------|-----------------|----------------|------------------|----------------|------------------|------|---------|-----------------|----------------|------------------|----------------|------------------|----|
| 1  | 187.09  | 94.05           |                |                  |                |                  | W    |         |                 |                |                  |                |                  | 12 |
| 2  | 244.11  | 122.56          |                |                  |                |                  | G    | 1093.53 | 547.27          | 1076.50        | 538.75           | 1075.52        | 538.26           | 11 |
| 3  | 301.13  | 151.07          |                |                  |                |                  | G    | 1036.51 | 518.76          | 1019.48        | 510.24           | 1018.50        | 509.75           | 10 |
| 4  | 358.15  | 179.58          |                |                  |                |                  | G    | 979.48  | 490.25          | 962.46         | 481.73           | 961.47         | 481.24           | 9  |
| 5  | 521.21  | 261.11          |                |                  |                |                  | Y    | 922.46  | 461.74          | 905.44         | 453.22           | 904.45         | 452.73           | 8  |
| 6  | 650.26  | 325.63          |                |                  | 632.25         | 316.63           | E    | 759.40  | 380.20          | 742.37         | 371.69           | 741.39         | 371.20           | 7  |
| 7  | 707.28  | 354.14          |                |                  | 689.27         | 345.14           | G    | 630.36  | 315.68          | 613.33         | 307.17           |                |                  | 6  |
| 8  | 835.34  | 418.17          | 818.31         | 409.66           | 817.33         | 409.17           | Q    | 573.34  | 287.17          | 556.31         | 278.66           |                |                  | 5  |
| 9  | 949.38  | 475.19          | 932.35         | 466.68           | 931.37         | 466.19           | N    | 445.28  | 223.14          | 428.25         | 214.63           |                |                  | 4  |
| 10 | 1062.46 | 531.74          | 1045.44        | 523.22           | 1044.45        | 522.73           | L    | 331.23  | 166.12          | 314.21         | 157.61           |                |                  | 3  |
| 11 | 1133.50 | 567.25          | 1116.47        | 558.74           | 1115.49        | 558.25           | A    | 218.15  | 109.58          | 201.12         | 101.07           |                |                  | 2  |
| 12 |         |                 |                |                  |                |                  | K    | 147.11  | 74.06           | 130.09         | 65.55            |                |                  | 1  |



Gene Symbol Sequences m/z Charge Ion score Expect  
 FAM50A AQYKGAASEAGR 625.812 2+ 60 0.00013  
 (IPI00030098 Protein FAM50A)

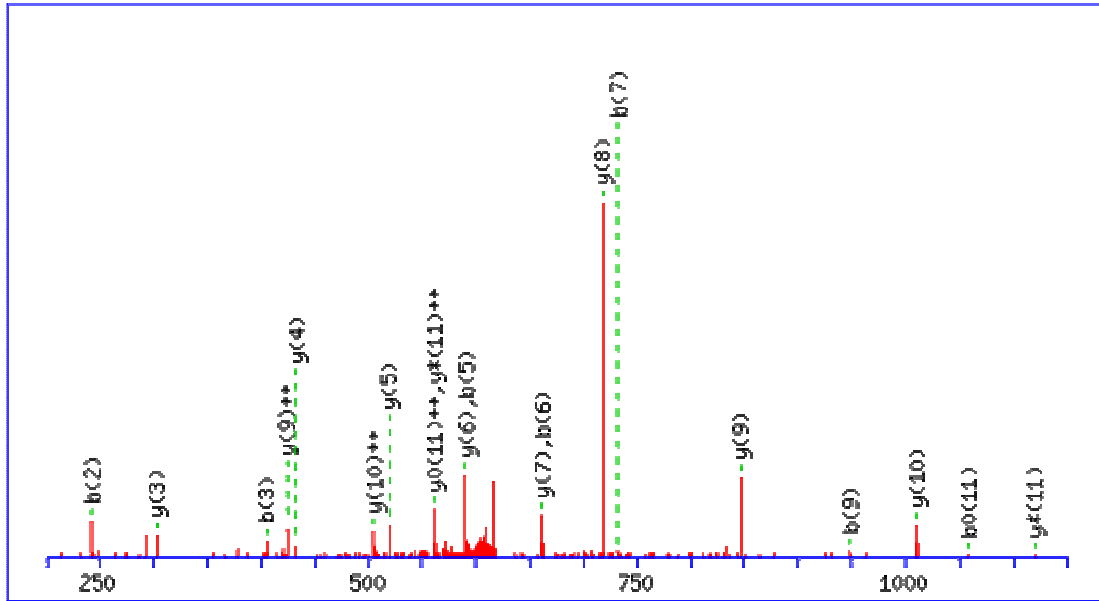

N-term : N-Acetyl (Protein)

| #  | b       | b <sup>++</sup> | b <sup>*</sup> | b <sup>+++</sup> | b <sup>0</sup> | b <sup>0++</sup> | Seq. | y       | y <sup>++</sup> | y <sup>*</sup> | y <sup>+++</sup> | y <sup>0</sup> | y <sup>0++</sup> | #  |
|----|---------|-----------------|----------------|------------------|----------------|------------------|------|---------|-----------------|----------------|------------------|----------------|------------------|----|
| 1  | 114.05  | 57.53           |                |                  |                |                  | A    |         |                 |                |                  |                |                  | 12 |
| 2  | 242.11  | 121.56          | 225.09         | 113.05           |                |                  | Q    | 1137.56 | 569.29          | 1120.54        | 560.77           | 1119.55        | 560.28           | 11 |
| 3  | 405.18  | 203.09          | 388.15         | 194.58           |                |                  | Y    | 1009.51 | 505.26          | 992.48         | 496.74           | 991.50         | 496.25           | 10 |
| 4  | 533.27  | 267.14          | 516.25         | 258.63           |                |                  | K    | 846.44  | 423.73          | 829.42         | 415.21           | 828.43         | 414.72           | 9  |
| 5  | 590.29  | 295.65          | 573.27         | 287.14           |                |                  | G    | 718.35  | 359.68          | 701.32         | 351.16           | 700.34         | 350.67           | 8  |
| 6  | 661.33  | 331.17          | 644.30         | 322.66           |                |                  | A    | 661.33  | 331.17          | 644.30         | 322.65           | 643.32         | 322.16           | 7  |
| 7  | 732.37  | 366.69          | 715.34         | 358.17           |                |                  | A    | 590.29  | 295.65          | 573.26         | 287.13           | 572.28         | 286.64           | 6  |
| 8  | 819.40  | 410.20          | 802.37         | 401.69           | 801.39         | 401.20           | S    | 519.25  | 260.13          | 502.23         | 251.62           | 501.24         | 251.12           | 5  |
| 9  | 948.44  | 474.72          | 931.42         | 466.21           | 930.43         | 465.72           | E    | 432.22  | 216.61          | 415.19         | 208.10           | 414.21         | 207.61           | 4  |
| 10 | 1019.48 | 510.24          | 1002.45        | 501.73           | 1001.47        | 501.24           | A    | 303.18  | 152.09          | 286.15         | 143.58           |                |                  | 3  |
| 11 | 1076.50 | 538.75          | 1059.47        | 530.24           | 1058.49        | 529.75           | G    | 232.14  | 116.57          | 215.11         | 108.06           |                |                  | 2  |
| 12 |         |                 |                |                  |                |                  | R    | 175.12  | 88.06           | 158.09         | 79.55            |                |                  | 1  |

Gene Symbol Sequences m/z Charge Ion score Expect  
 FIP1L1 TGAPQYGSYGTAPVNLNIK 980.008 2+ 79 1.7e-06  
 (IPI00008449 Isoform 3 of Pre-mRNA 3'-end-processing factor FIP1)

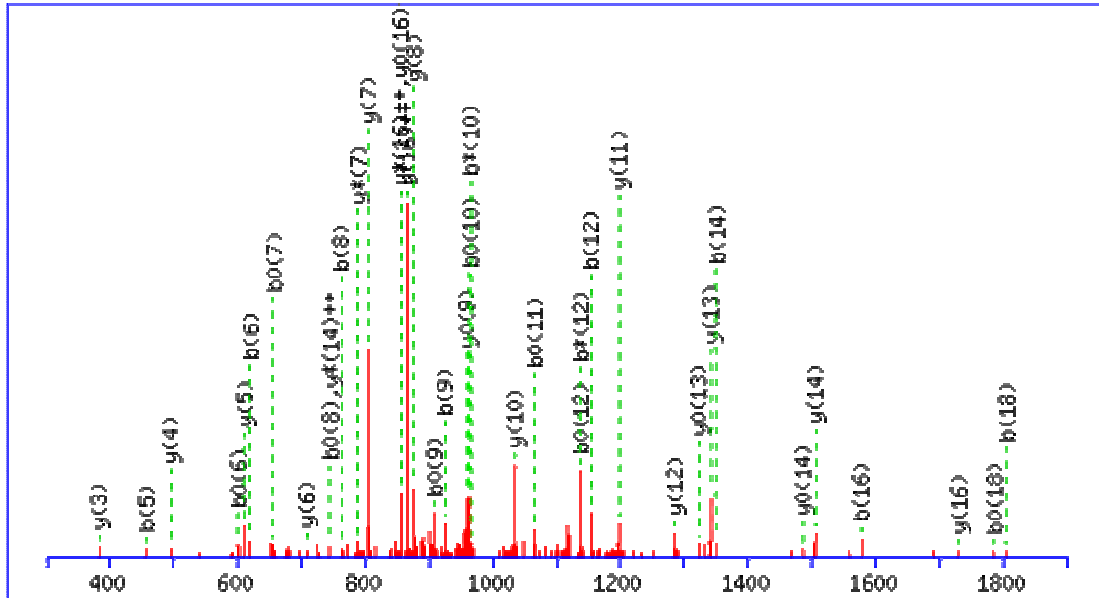

K19: Lysine (K-full)

| #  | b       | b <sup>++</sup> | b <sup>*</sup> | b <sup>+++</sup> | b <sup>0</sup> | b <sup>0++</sup> | Seq. | y       | y <sup>++</sup> | y <sup>*</sup> | y <sup>+++</sup> | y <sup>0</sup> | y <sup>0++</sup> | #  |
|----|---------|-----------------|----------------|------------------|----------------|------------------|------|---------|-----------------|----------------|------------------|----------------|------------------|----|
| 1  | 102.05  | 51.53           |                |                  | 84.04          | 42.53            | T    |         |                 |                |                  |                |                  | 19 |
| 2  | 159.08  | 80.04           |                |                  | 141.07         | 71.04            | G    | 1857.96 | 929.48          | 1840.93        | 920.97           | 1839.95        | 920.48           | 18 |
| 3  | 230.11  | 115.56          |                |                  | 212.10         | 106.56           | A    | 1800.94 | 900.97          | 1783.91        | 892.46           | 1782.93        | 891.97           | 17 |
| 4  | 327.17  | 164.09          |                |                  | 309.16         | 155.08           | P    | 1729.90 | 865.45          | 1712.87        | 856.94           | 1711.89        | 856.45           | 16 |
| 5  | 455.22  | 228.12          | 438.20         | 219.60           | 437.21         | 219.11           | Q    | 1632.85 | 816.93          | 1615.82        | 808.41           | 1614.84        | 807.92           | 15 |
| 6  | 618.29  | 309.65          | 601.26         | 301.13           | 600.28         | 300.64           | Y    | 1504.79 | 752.90          | 1487.76        | 744.38           | 1486.78        | 743.89           | 14 |
| 7  | 675.31  | 338.16          | 658.28         | 329.65           | 657.30         | 329.15           | G    | 1341.73 | 671.37          | 1324.70        | 662.85           | 1323.71        | 662.36           | 13 |
| 8  | 762.34  | 381.67          | 745.32         | 373.16           | 744.33         | 372.67           | S    | 1284.70 | 642.86          | 1267.68        | 634.34           | 1266.69        | 633.85           | 12 |
| 9  | 925.41  | 463.21          | 908.38         | 454.69           | 907.39         | 454.20           | Y    | 1197.67 | 599.34          | 1180.65        | 590.83           | 1179.66        | 590.33           | 11 |
| 10 | 982.43  | 491.72          | 965.40         | 483.20           | 964.42         | 482.71           | G    | 1034.61 | 517.81          | 1017.58        | 509.29           | 1016.60        | 508.80           | 10 |
| 11 | 1083.47 | 542.24          | 1066.45        | 533.73           | 1065.46        | 533.24           | T    | 977.59  | 489.30          | 960.56         | 480.78           | 959.58         | 480.29           | 9  |
| 12 | 1154.51 | 577.76          | 1137.48        | 569.25           | 1136.50        | 568.75           | A    | 876.54  | 438.77          | 859.51         | 430.26           |                |                  | 8  |
| 13 | 1251.56 | 626.29          | 1234.54        | 617.77           | 1233.55        | 617.28           | P    | 805.50  | 403.25          | 788.48         | 394.74           |                |                  | 7  |
| 14 | 1350.63 | 675.82          | 1333.61        | 667.31           | 1332.62        | 666.81           | V    | 708.45  | 354.73          | 691.42         | 346.22           |                |                  | 6  |
| 15 | 1464.68 | 732.84          | 1447.65        | 724.33           | 1446.66        | 723.84           | N    | 609.38  | 305.19          | 592.35         | 296.68           |                |                  | 5  |
| 16 | 1577.76 | 789.38          | 1560.73        | 780.87           | 1559.75        | 780.38           | L    | 495.34  | 248.17          | 478.31         | 239.66           |                |                  | 4  |
| 17 | 1691.80 | 846.40          | 1674.78        | 837.89           | 1673.79        | 837.40           | N    | 382.25  | 191.63          | 365.23         | 183.12           |                |                  | 3  |
| 18 | 1804.89 | 902.95          | 1787.86        | 894.43           | 1786.88        | 893.94           | I    | 268.21  | 134.61          | 251.18         | 126.10           |                |                  | 2  |
| 19 |         |                 |                |                  |                |                  | K    | 155.13  | 78.07           | 138.10         | 69.55            |                |                  | 1  |

Gene Symbol Sequences m/z Charge Ion score Expect  
 GRHPR AADCEVEQWDSDEPIPAKELER 863.060 3+ 84 4e-07  
 (IPI00037448 Glyoxylate reductase/hydroxypyruvate reductase)

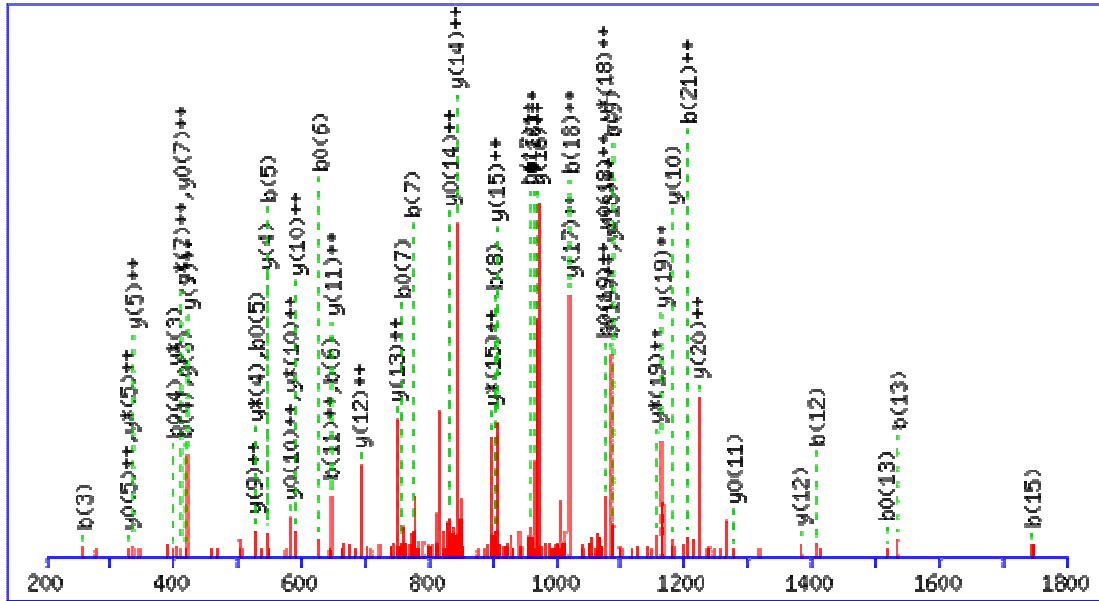

C4: Carbamidomethylated

| #  | b              | b <sup>++</sup> | b <sup>*</sup> | b <sup>+++</sup> | b <sup>0</sup> | b <sup>0++</sup> | Seq. | y              | y <sup>++</sup> | y <sup>*</sup> | y <sup>+++</sup> | y <sup>0</sup> | y <sup>0++</sup> | #  |
|----|----------------|-----------------|----------------|------------------|----------------|------------------|------|----------------|-----------------|----------------|------------------|----------------|------------------|----|
| 1  | 72.04          | 36.53           |                |                  |                |                  | A    |                |                 |                |                  |                |                  | 22 |
| 2  | 143.08         | 72.04           |                |                  |                |                  | A    | 2516.12        | 1258.57         | 2499.10        | 1250.05          | 2498.11        | 1249.56          | 21 |
| 3  | <b>258.11</b>  | 129.56          |                |                  | 240.10         | 120.55           | D    | 2445.09        | <b>1223.05</b>  | 2428.06        | 1214.53          | 2427.08        | 1214.04          | 20 |
| 4  | <b>418.14</b>  | 209.57          |                |                  | <b>400.13</b>  | 200.57           | C    | 2330.06        | <b>1165.53</b>  | 2313.03        | <b>1157.02</b>   | 2312.05        | 1156.53          | 19 |
| 5  | <b>547.18</b>  | 274.09          |                |                  | <b>529.17</b>  | 265.09           | E    | 2170.03        | <b>1085.52</b>  | 2153.00        | <b>1077.01</b>   | 2152.02        | <b>1076.51</b>   | 18 |
| 6  | <b>646.25</b>  | 323.63          |                |                  | <b>628.24</b>  | 314.62           | V    | 2040.99        | <b>1021.00</b>  | 2023.96        | 1012.48          | 2022.98        | 1011.99          | 17 |
| 7  | <b>775.29</b>  | 388.15          |                |                  | <b>757.28</b>  | 379.14           | E    | 1941.92        | <b>971.46</b>   | 1924.89        | <b>962.95</b>    | 1923.91        | <b>962.46</b>    | 16 |
| 8  | <b>903.35</b>  | 452.18          | 886.32         | 443.67           | 885.34         | 443.17           | Q    | 1812.88        | <b>906.94</b>   | 1795.85        | <b>898.43</b>    | 1794.87        | 897.94           | 15 |
| 9  | <b>1089.43</b> | 545.22          | 1072.40        | 536.71           | 1071.42        | 536.21           | W    | 1684.82        | <b>842.91</b>   | 1667.79        | 834.40           | 1666.81        | <b>833.91</b>    | 14 |
| 10 | 1204.46        | 602.73          | 1187.43        | 594.22           | 1186.45        | 593.73           | D    | 1498.74        | <b>749.87</b>   | 1481.71        | 741.36           | 1480.73        | 740.87           | 13 |
| 11 | 1291.49        | <b>646.25</b>   | 1274.46        | 637.74           | 1273.48        | 637.24           | S    | <b>1383.71</b> | <b>692.36</b>   | 1366.68        | 683.85           | 1365.70        | 683.35           | 12 |
| 12 | <b>1406.52</b> | 703.76          | 1389.49        | 695.25           | 1388.51        | 694.76           | D    | 1296.68        | <b>648.84</b>   | 1279.65        | 640.33           | <b>1278.67</b> | 639.84           | 11 |
| 13 | <b>1535.56</b> | 768.28          | 1518.53        | 759.77           | <b>1517.55</b> | 759.28           | E    | <b>1181.65</b> | <b>591.33</b>   | 1164.63        | <b>582.82</b>    | 1163.64        | <b>582.32</b>    | 10 |
| 14 | 1632.61        | 816.81          | 1615.59        | 808.30           | 1614.60        | 807.80           | P    | 1052.61        | <b>526.81</b>   | 1035.58        | 518.30           | 1034.60        | 517.80           | 9  |
| 15 | <b>1745.70</b> | 873.35          | 1728.67        | 864.84           | 1727.69        | 864.35           | I    | 955.56         | 478.28          | 938.53         | 469.77           | 937.55         | 469.28           | 8  |
| 16 | 1842.75        | 921.88          | 1825.72        | 913.36           | 1824.74        | 912.87           | P    | 842.47         | <b>421.74</b>   | 825.45         | <b>413.23</b>    | 824.46         | <b>412.73</b>    | 7  |
| 17 | 1913.79        | <b>957.40</b>   | 1896.76        | 948.88           | 1895.78        | 948.39           | A    | 745.42         | 373.21          | 728.39         | 364.70           | 727.41         | 364.21           | 6  |
| 18 | 2041.88        | <b>1021.44</b>  | 2024.85        | 1012.93          | 2023.87        | 1012.44          | K    | 674.38         | <b>337.70</b>   | 657.36         | <b>329.18</b>    | 656.37         | <b>328.69</b>    | 5  |
| 19 | 2170.92        | <b>1085.97</b>  | 2153.90        | 1077.45          | 2152.91        | <b>1076.96</b>   | E    | <b>546.29</b>  | 273.65          | <b>529.26</b>  | 265.13           | 528.28         | 264.64           | 4  |
| 20 | 2284.01        | 1142.51         | 2266.98        | 1133.99          | 2266.00        | 1133.50          | L    | <b>417.25</b>  | 209.13          | <b>400.22</b>  | 200.61           | 399.24         | 200.12           | 3  |
| 21 | 2413.05        | <b>1207.03</b>  | 2396.02        | 1198.52          | 2395.04        | 1198.02          | E    | 304.16         | 152.58          | 287.13         | 144.07           | 286.15         | 143.58           | 2  |
| 22 |                |                 |                |                  |                |                  | R    | 175.12         | 88.06           | 158.09         | 79.55            |                |                  | 1  |

Gene Symbol Sequences m/z Charge Ion score Expect  
 GSPT1 FVKQDQVCIAR 682.361 2+ 57 0.00027  
 (IPI00218829 G1 to S phase transition protein 1 homolog)

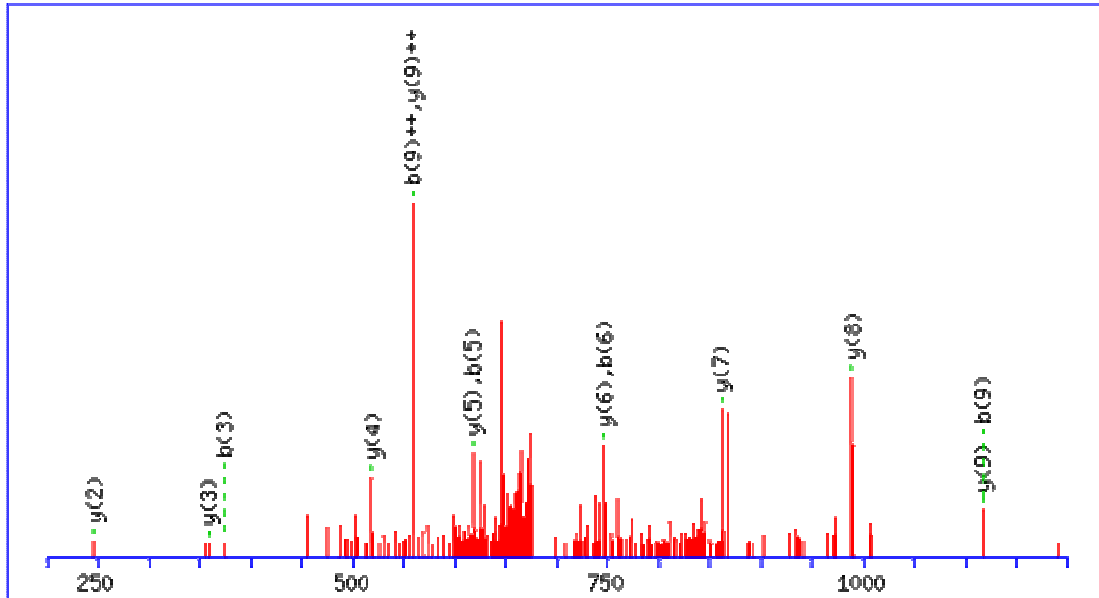

C8: Carbamidomethylated

| #  | b       | b <sup>++</sup> | b <sup>+</sup> | b <sup>+++</sup> | b <sup>0</sup> | b <sup>0++</sup> | Seq. | y       | y <sup>++</sup> | y <sup>+</sup> | y <sup>+++</sup> | y <sup>0</sup> | y <sup>0++</sup> | #  |
|----|---------|-----------------|----------------|------------------|----------------|------------------|------|---------|-----------------|----------------|------------------|----------------|------------------|----|
| 1  | 148.08  | 74.54           |                |                  |                |                  | F    |         |                 |                |                  |                |                  | 11 |
| 2  | 247.14  | 124.08          |                |                  |                |                  | V    | 1216.65 | 608.83          | 1199.62        | 600.31           | 1198.64        | 599.82           | 10 |
| 3  | 375.24  | 188.12          | 358.21         | 179.61           |                |                  | K    | 1117.58 | 559.29          | 1100.55        | 550.78           | 1099.57        | 550.29           | 9  |
| 4  | 503.30  | 252.15          | 486.27         | 243.64           |                |                  | Q    | 989.48  | 495.25          | 972.46         | 486.73           | 971.47         | 486.24           | 8  |
| 5  | 618.32  | 309.67          | 601.30         | 301.15           | 600.31         | 300.66           | D    | 861.42  | 431.22          | 844.40         | 422.70           | 843.41         | 422.21           | 7  |
| 6  | 746.38  | 373.70          | 729.36         | 365.18           | 728.37         | 364.69           | Q    | 746.40  | 373.70          | 729.37         | 365.19           |                |                  | 6  |
| 7  | 845.45  | 423.23          | 828.43         | 414.72           | 827.44         | 414.22           | V    | 618.34  | 309.67          | 601.31         | 301.16           |                |                  | 5  |
| 8  | 1005.48 | 503.24          | 988.46         | 494.73           | 987.47         | 494.24           | C    | 519.27  | 260.14          | 502.24         | 251.63           |                |                  | 4  |
| 9  | 1118.57 | 559.79          | 1101.54        | 551.27           | 1100.56        | 550.78           | I    | 359.24  | 180.12          | 342.21         | 171.61           |                |                  | 3  |
| 10 | 1189.60 | 595.31          | 1172.58        | 586.79           | 1171.59        | 586.30           | A    | 246.16  | 123.58          | 229.13         | 115.07           |                |                  | 2  |
| 11 |         |                 |                |                  |                |                  | R    | 175.12  | 88.06           | 158.09         | 79.55            |                |                  | 1  |

Gene Symbol                      Sequences                      m/z      Charge      Ion score      Expect  
 HIGD1A                      STDTGVSLPSYEEDQGSKLIR      1166.573      2+      80      1.5e-06  
 (IPI00295621 HIG1 domain family member 1A)

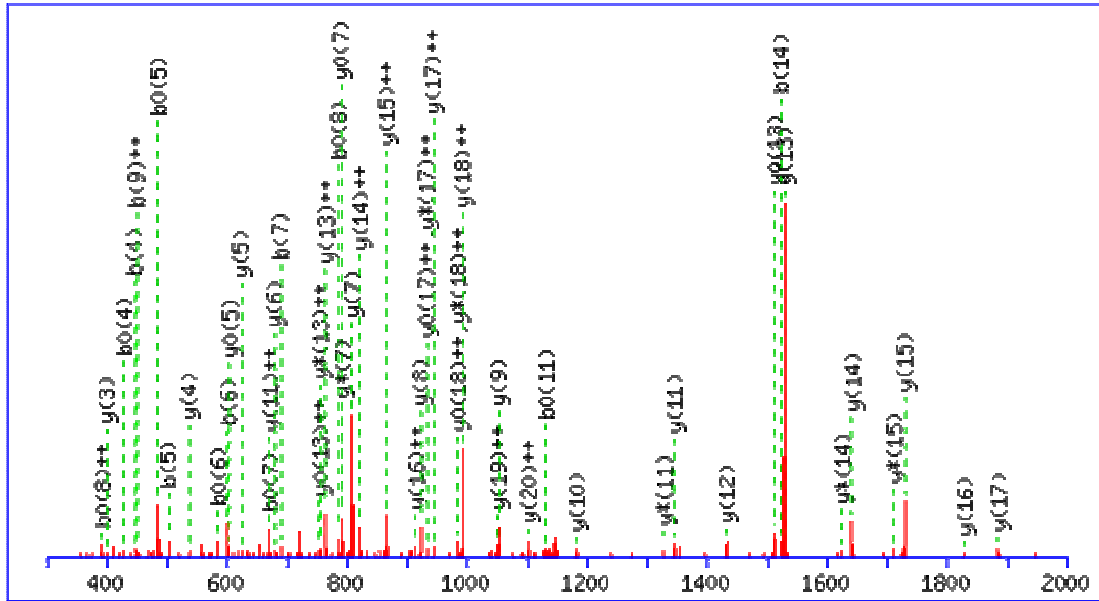

N-term : N-Acetyl (Protein)

K18: Lysine (K-full)

| #  | b       | b <sup>++</sup> | b <sup>*</sup> | b <sup>***</sup> | b <sup>0</sup> | b <sup>0++</sup> | Seq. | y       | y <sup>++</sup> | y <sup>*</sup> | y <sup>***</sup> | y <sup>0</sup> | y <sup>0++</sup> | #  |
|----|---------|-----------------|----------------|------------------|----------------|------------------|------|---------|-----------------|----------------|------------------|----------------|------------------|----|
| 1  | 130.05  | 65.53           |                |                  | 112.04         | 56.52            | S    |         |                 |                |                  |                |                  | 21 |
| 2  | 231.10  | 116.05          |                |                  | 213.09         | 107.05           | T    | 2203.10 | 1102.05         | 2186.07        | 1093.54          | 2185.09        | 1093.05          | 20 |
| 3  | 346.12  | 173.57          |                |                  | 328.11         | 164.56           | D    | 2102.05 | 1051.53         | 2085.02        | 1043.01          | 2084.04        | 1042.52          | 19 |
| 4  | 447.17  | 224.09          |                |                  | 429.16         | 215.08           | T    | 1987.02 | 994.01          | 1970.00        | 985.50           | 1969.01        | 985.01           | 18 |
| 5  | 504.19  | 252.60          |                |                  | 486.18         | 243.60           | G    | 1885.97 | 943.49          | 1868.95        | 934.98           | 1867.96        | 934.49           | 17 |
| 6  | 603.26  | 302.13          |                |                  | 585.25         | 293.13           | V    | 1828.95 | 914.98          | 1811.93        | 906.47           | 1810.94        | 905.97           | 16 |
| 7  | 690.29  | 345.65          |                |                  | 672.28         | 336.65           | S    | 1729.88 | 865.45          | 1712.86        | 856.93           | 1711.87        | 856.44           | 15 |
| 8  | 803.38  | 402.19          |                |                  | 785.37         | 393.19           | L    | 1642.85 | 821.93          | 1625.83        | 813.42           | 1624.84        | 812.92           | 14 |
| 9  | 900.43  | 450.72          |                |                  | 882.42         | 441.71           | P    | 1529.77 | 765.39          | 1512.74        | 756.87           | 1511.76        | 756.38           | 13 |
| 10 | 987.46  | 494.24          |                |                  | 969.45         | 485.23           | S    | 1432.72 | 716.86          | 1415.69        | 708.35           | 1414.71        | 707.86           | 12 |
| 11 | 1150.53 | 575.77          |                |                  | 1132.52        | 566.76           | Y    | 1345.68 | 673.35          | 1328.66        | 664.83           | 1327.67        | 664.34           | 11 |
| 12 | 1279.57 | 640.29          |                |                  | 1261.56        | 631.28           | E    | 1182.62 | 591.81          | 1165.59        | 583.30           | 1164.61        | 582.81           | 10 |
| 13 | 1408.61 | 704.81          |                |                  | 1390.60        | 695.80           | E    | 1053.58 | 527.29          | 1036.55        | 518.78           | 1035.57        | 518.29           | 9  |
| 14 | 1523.64 | 762.32          |                |                  | 1505.63        | 753.32           | D    | 924.54  | 462.77          | 907.51         | 454.26           | 906.52         | 453.77           | 8  |
| 15 | 1651.70 | 826.35          | 1634.67        | 817.84           | 1633.69        | 817.35           | Q    | 809.51  | 405.26          | 792.48         | 396.74           | 791.50         | 396.25           | 7  |
| 16 | 1708.72 | 854.86          | 1691.69        | 846.35           | 1690.71        | 845.86           | G    | 681.45  | 341.23          | 664.42         | 332.72           | 663.44         | 332.22           | 6  |
| 17 | 1795.75 | 898.38          | 1778.72        | 889.87           | 1777.74        | 889.37           | S    | 624.43  | 312.72          | 607.40         | 304.20           | 606.42         | 303.71           | 5  |
| 18 | 1931.86 | 966.43          | 1914.83        | 957.92           | 1913.85        | 957.43           | K    | 537.40  | 269.20          | 520.37         | 260.69           |                |                  | 4  |
| 19 | 2044.94 | 1022.98         | 2027.92        | 1014.46          | 2026.93        | 1013.97          | L    | 401.29  | 201.15          | 384.26         | 192.63           |                |                  | 3  |
| 20 | 2158.03 | 1079.52         | 2141.00        | 1071.00          | 2140.02        | 1070.51          | I    | 288.20  | 144.61          | 271.18         | 136.09           |                |                  | 2  |
| 21 |         |                 |                |                  |                |                  | R    | 175.12  | 88.06           | 158.09         | 79.55            |                |                  | 1  |

Gene Symbol Sequences m/z Charge Ion score Expect  
 HIP1R TPLQGILQLGQELKPK 593.697 3+ 47 0.00015  
 (IPI00024417 Huntingtin-interacting protein 1-related protein)

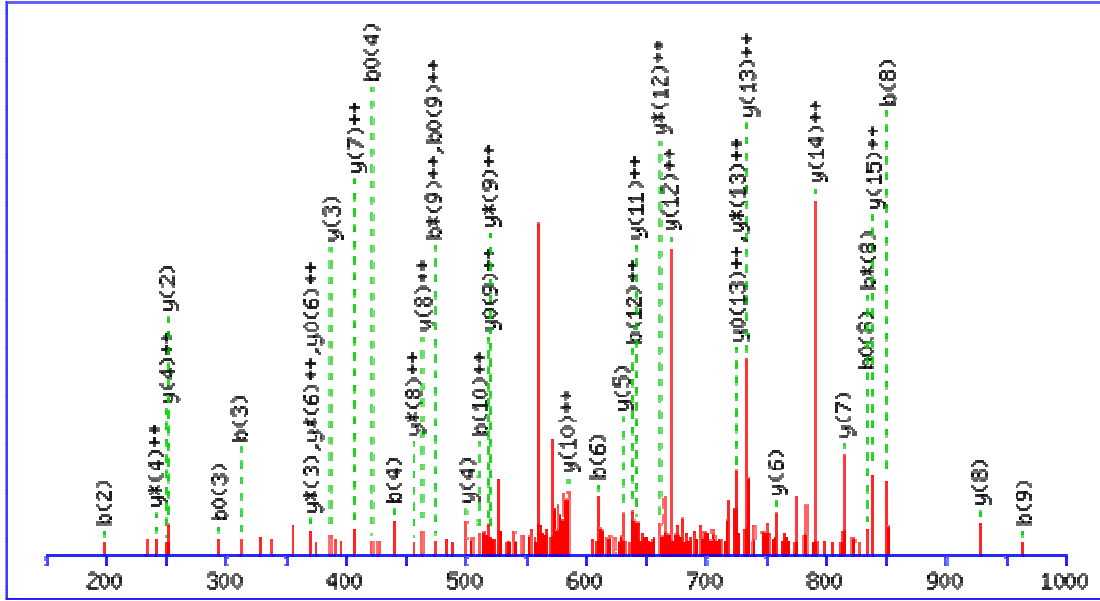

K14, K16: Lysine (K-full)

| #  | b       | b <sup>++</sup> | b <sup>+</sup> | b <sup>+++</sup> | b <sup>0</sup> | b <sup>0++</sup> | Seq. | y       | y <sup>++</sup> | y <sup>+</sup> | y <sup>+++</sup> | y <sup>0</sup> | y <sup>0++</sup> | #  |
|----|---------|-----------------|----------------|------------------|----------------|------------------|------|---------|-----------------|----------------|------------------|----------------|------------------|----|
| 1  | 102.05  | 51.53           |                |                  | 84.04          | 42.53            | T    |         |                 |                |                  |                |                  | 16 |
| 2  | 199.11  | 100.06          |                |                  | 181.10         | 91.05            | P    | 1678.02 | 839.52          | 1661.00        | 831.00           | 1660.01        | 830.51           | 15 |
| 3  | 312.19  | 156.60          |                |                  | 294.18         | 147.59           | L    | 1580.97 | 790.99          | 1563.94        | 782.48           | 1562.96        | 781.98           | 14 |
| 4  | 440.25  | 220.63          | 423.22         | 212.12           | 422.24         | 211.62           | Q    | 1467.89 | 734.45          | 1450.86        | 725.93           | 1449.88        | 725.44           | 13 |
| 5  | 497.27  | 249.14          | 480.25         | 240.63           | 479.26         | 240.13           | G    | 1339.83 | 670.42          | 1322.80        | 661.90           | 1321.82        | 661.41           | 12 |
| 6  | 610.36  | 305.68          | 593.33         | 297.17           | 592.35         | 296.68           | I    | 1282.81 | 641.91          | 1265.78        | 633.39           | 1264.80        | 632.90           | 11 |
| 7  | 723.44  | 362.22          | 706.41         | 353.71           | 705.43         | 353.22           | L    | 1169.72 | 585.36          | 1152.70        | 576.85           | 1151.71        | 576.36           | 10 |
| 8  | 851.50  | 426.25          | 834.47         | 417.74           | 833.49         | 417.25           | Q    | 1056.64 | 528.82          | 1039.61        | 520.31           | 1038.63        | 519.82           | 9  |
| 9  | 964.58  | 482.79          | 947.56         | 474.28           | 946.57         | 473.79           | L    | 928.58  | 464.79          | 911.55         | 456.28           | 910.57         | 455.79           | 8  |
| 10 | 1021.60 | 511.31          | 1004.58        | 502.79           | 1003.59        | 502.30           | G    | 815.50  | 408.25          | 798.47         | 399.74           | 797.49         | 399.25           | 7  |
| 11 | 1149.66 | 575.33          | 1132.64        | 566.82           | 1131.65        | 566.33           | Q    | 758.47  | 379.74          | 741.45         | 371.23           | 740.46         | 370.74           | 6  |
| 12 | 1278.71 | 639.86          | 1261.68        | 631.34           | 1260.69        | 630.85           | E    | 630.42  | 315.71          | 613.39         | 307.20           | 612.41         | 306.71           | 5  |
| 13 | 1391.79 | 696.40          | 1374.76        | 687.88           | 1373.78        | 687.39           | L    | 501.37  | 251.19          | 484.35         | 242.68           |                |                  | 4  |
| 14 | 1527.90 | 764.45          | 1510.87        | 755.94           | 1509.89        | 755.45           | K    | 388.29  | 194.65          | 371.26         | 186.13           |                |                  | 3  |
| 15 | 1624.95 | 812.98          | 1607.92        | 804.47           | 1606.94        | 803.97           | P    | 252.18  | 126.59          | 235.15         | 118.08           |                |                  | 2  |
| 16 |         |                 |                |                  |                |                  | K    | 155.13  | 78.07           | 138.10         | 69.55            |                |                  | 1  |

Gene Symbol Sequences m/z Charge Ion score Expect  
HMGA2 GEGAGQPSTSAQGQPAAPAPQKR 733.707 3+ 73 7.8e-06  
(IPI00005996 High mobility group protein HMGI-C)

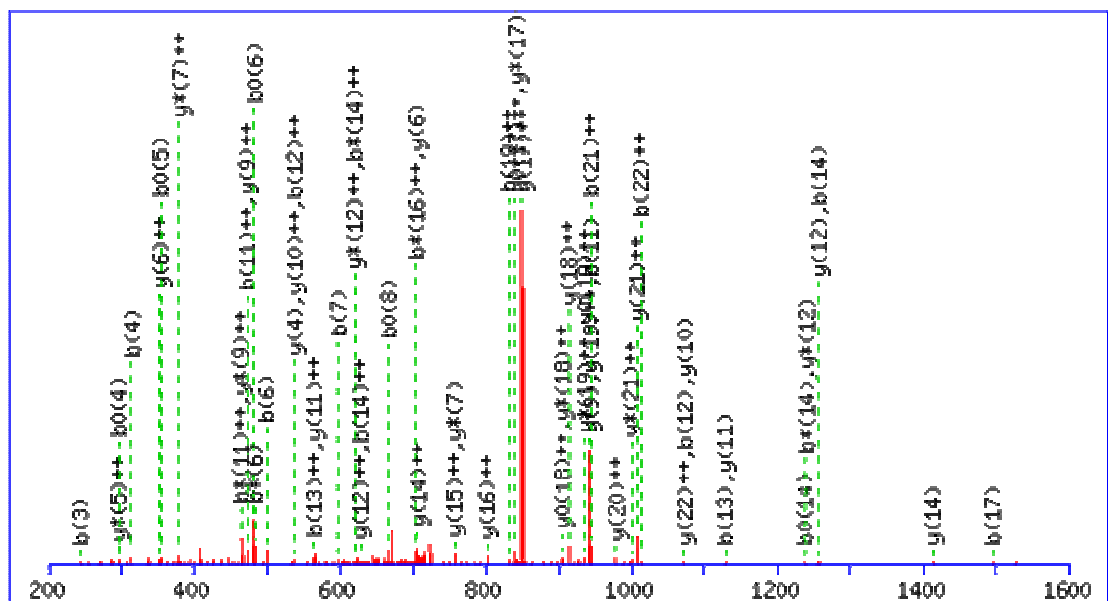

K22: Lysine (K-full)

| #  | b              | b <sup>++</sup> | b <sup>+</sup> | b <sup>+++</sup> | b <sup>0</sup> | b <sup>0++</sup> | Seq. | y              | y <sup>++</sup> | y <sup>+</sup> | y <sup>+++</sup> | y <sup>0</sup> | y <sup>0++</sup> | #  |
|----|----------------|-----------------|----------------|------------------|----------------|------------------|------|----------------|-----------------|----------------|------------------|----------------|------------------|----|
| 1  | 58.03          | 29.52           |                |                  |                |                  | G    |                |                 |                |                  |                |                  | 23 |
| 2  | 187.07         | 94.04           |                |                  | 169.06         | 85.03            | E    | 2142.08        | <b>1071.54</b>  | 2125.05        | 1063.03          | 2124.07        | 1062.54          | 22 |
| 3  | <b>244.09</b>  | 122.55          |                |                  | 226.08         | 113.54           | G    | 2013.04        | <b>1007.02</b>  | 1996.01        | <b>998.51</b>    | 1995.02        | 998.02           | 21 |
| 4  | <b>315.13</b>  | 158.07          |                |                  | <b>297.12</b>  | 149.06           | A    | 1956.01        | <b>978.51</b>   | 1938.99        | 970.00           | 1938.00        | 969.51           | 20 |
| 5  | 372.15         | 186.58          |                |                  | <b>354.14</b>  | 177.57           | G    | 1884.98        | <b>942.99</b>   | 1867.95        | <b>934.48</b>    | 1866.97        | <b>933.99</b>    | 19 |
| 6  | <b>500.21</b>  | 250.61          | <b>483.18</b>  | 242.10           | <b>482.20</b>  | 241.60           | Q    | 1827.96        | <b>914.48</b>   | 1810.93        | <b>905.97</b>    | 1809.94        | <b>905.48</b>    | 18 |
| 7  | <b>597.26</b>  | 299.13          | 580.24         | 290.62           | 579.25         | 290.13           | P    | 1699.90        | <b>850.45</b>   | 1682.87        | <b>841.94</b>    | 1681.89        | <b>841.45</b>    | 17 |
| 8  | 684.29         | 342.65          | 667.27         | 334.14           | <b>666.28</b>  | 333.65           | S    | 1602.84        | <b>801.93</b>   | 1585.82        | 793.41           | 1584.83        | 792.92           | 16 |
| 9  | 785.34         | 393.17          | 768.32         | 384.66           | 767.33         | 384.17           | T    | 1515.81        | <b>758.41</b>   | 1498.79        | 749.90           | 1497.80        | 749.40           | 15 |
| 10 | 872.37         | 436.69          | 855.35         | 428.18           | 854.36         | 427.69           | S    | <b>1414.76</b> | <b>707.89</b>   | 1397.74        | 699.37           | 1396.75        | 698.88           | 14 |
| 11 | <b>943.41</b>  | <b>472.21</b>   | 926.38         | <b>463.70</b>    | 925.40         | 463.20           | A    | 1327.73        | 664.37          | 1310.71        | 655.86           |                |                  | 13 |
| 12 | <b>1071.47</b> | <b>536.24</b>   | 1054.44        | 527.73           | 1053.46        | 527.23           | Q    | <b>1256.69</b> | <b>628.85</b>   | <b>1239.67</b> | <b>620.34</b>    |                |                  | 12 |
| 13 | <b>1128.49</b> | <b>564.75</b>   | 1111.47        | 556.24           | 1110.48        | 555.74           | G    | <b>1128.64</b> | <b>564.82</b>   | 1111.61        | 556.31           |                |                  | 11 |
| 14 | <b>1256.55</b> | <b>628.78</b>   | <b>1239.52</b> | <b>620.27</b>    | <b>1238.54</b> | 619.77           | Q    | <b>1071.61</b> | <b>536.31</b>   | 1054.59        | 527.80           |                |                  | 10 |
| 15 | 1353.60        | 677.31          | 1336.58        | 668.79           | 1335.59        | 668.30           | P    | <b>943.56</b>  | <b>472.28</b>   | 926.53         | <b>463.77</b>    |                |                  | 9  |
| 16 | 1424.64        | 712.82          | 1407.61        | <b>704.31</b>    | 1406.63        | 703.82           | A    | 846.50         | 423.76          | 829.48         | 415.24           |                |                  | 8  |
| 17 | <b>1495.68</b> | 748.34          | 1478.65        | 739.83           | 1477.67        | 739.34           | A    | 775.47         | 388.24          | <b>758.44</b>  | <b>379.72</b>    |                |                  | 7  |
| 18 | 1592.73        | 796.87          | 1575.70        | 788.36           | 1574.72        | 787.86           | P    | <b>704.43</b>  | <b>352.72</b>   | 687.40         | 344.21           |                |                  | 6  |
| 19 | 1663.77        | <b>832.39</b>   | 1646.74        | 823.87           | 1645.76        | 823.38           | A    | 607.38         | 304.19          | 590.35         | <b>295.68</b>    |                |                  | 5  |
| 20 | 1760.82        | 880.91          | 1743.79        | 872.40           | 1742.81        | 871.91           | P    | <b>536.34</b>  | 268.67          | 519.31         | 260.16           |                |                  | 4  |
| 21 | 1888.88        | <b>944.94</b>   | 1871.85        | 936.43           | 1870.87        | 935.94           | Q    | 439.29         | 220.15          | 422.26         | 211.63           |                |                  | 3  |
| 22 | 2024.99        | <b>1013.00</b>  | 2007.96        | 1004.48          | 2006.98        | 1003.99          | K    | 311.23         | 156.12          | 294.20         | 147.60           |                |                  | 2  |
| 23 |                |                 |                |                  |                |                  | R    | 175.12         | 88.06           | 158.09         | 79.55            |                |                  | 1  |

Gene Symbol Sequences m/z Charge Ion score Expect  
 INPP1 LCSTEEETAELLSK 805.387 2+ 75 4.2e-06  
 (IPI00027139 Inositol polyphosphate 1-phosphatase)

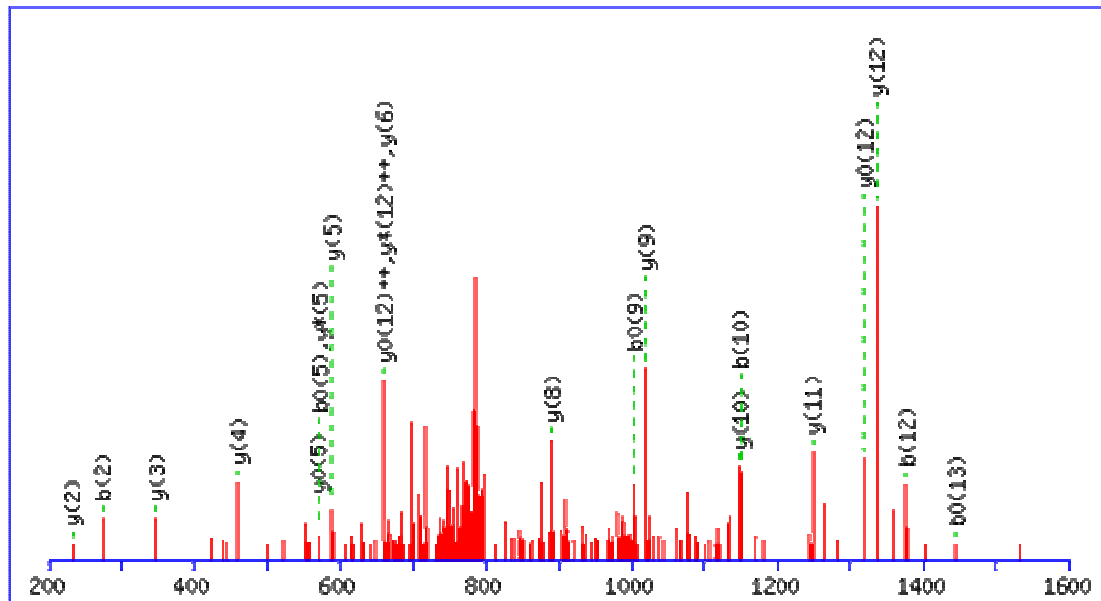

C2: Carbamidomethylated

| #  | b              | b <sup>++</sup> | b <sup>0</sup> | b <sup>0++</sup> | Seq. | y              | y <sup>++</sup> | y <sup>*</sup> | y <sup>*++</sup> | y <sup>0</sup> | y <sup>0++</sup> | #  |
|----|----------------|-----------------|----------------|------------------|------|----------------|-----------------|----------------|------------------|----------------|------------------|----|
| 1  | 114.09         | 57.55           |                |                  | L    |                |                 |                |                  |                |                  | 14 |
| 2  | <b>274.12</b>  | 137.56          |                |                  | C    | 1496.68        | 748.84          | 1479.65        | 740.33           | 1478.67        | 739.84           | 13 |
| 3  | 361.15         | 181.08          | 343.14         | 172.08           | S    | <b>1336.65</b> | 668.83          | 1319.62        | <b>660.31</b>    | <b>1318.64</b> | <b>659.82</b>    | 12 |
| 4  | 462.20         | 231.60          | 444.19         | 222.60           | T    | <b>1249.62</b> | 625.31          | 1232.59        | 616.80           | 1231.61        | 616.31           | 11 |
| 5  | 591.24         | 296.13          | <b>573.23</b>  | 287.12           | E    | <b>1148.57</b> | 574.79          | 1131.54        | 566.27           | 1130.56        | 565.78           | 10 |
| 6  | 720.29         | 360.65          | 702.28         | 351.64           | E    | <b>1019.53</b> | 510.27          | 1002.50        | 501.75           | 1001.51        | 501.26           | 9  |
| 7  | 849.33         | 425.17          | 831.32         | 416.16           | E    | <b>890.48</b>  | 445.75          | 873.46         | 437.23           | 872.47         | 436.74           | 8  |
| 8  | 950.38         | 475.69          | 932.37         | 466.69           | T    | 761.44         | 381.22          | 744.41         | 372.71           | 743.43         | 372.22           | 7  |
| 9  | 1021.41        | 511.21          | <b>1003.40</b> | 502.21           | A    | <b>660.39</b>  | 330.70          | 643.37         | 322.19           | 642.38         | 321.69           | 6  |
| 10 | <b>1150.46</b> | 575.73          | 1132.45        | 566.73           | E    | <b>589.36</b>  | 295.18          | <b>572.33</b>  | 286.67           | <b>571.34</b>  | 286.18           | 5  |
| 11 | 1263.54        | 632.27          | 1245.53        | 623.27           | L    | <b>460.31</b>  | 230.66          | 443.29         | 222.15           | 442.30         | 221.65           | 4  |
| 12 | <b>1376.62</b> | 688.82          | 1358.61        | 679.81           | L    | <b>347.23</b>  | 174.12          | 330.20         | 165.60           | 329.22         | 165.11           | 3  |
| 13 | 1463.66        | 732.33          | <b>1445.65</b> | 723.33           | S    | <b>234.14</b>  | 117.58          | 217.12         | 109.06           | 216.13         | 108.57           | 2  |
| 14 |                |                 |                |                  | K    | 147.11         | 74.06           | 130.09         | 65.55            |                |                  | 1  |



Gene Symbol Sequences m/z Charge Ion score Expect  
 LOC389217 EFHNLNESGNPSSK 727.838 2+ 58 0.00016  
 (IPI00398010 similar to Protein SET)

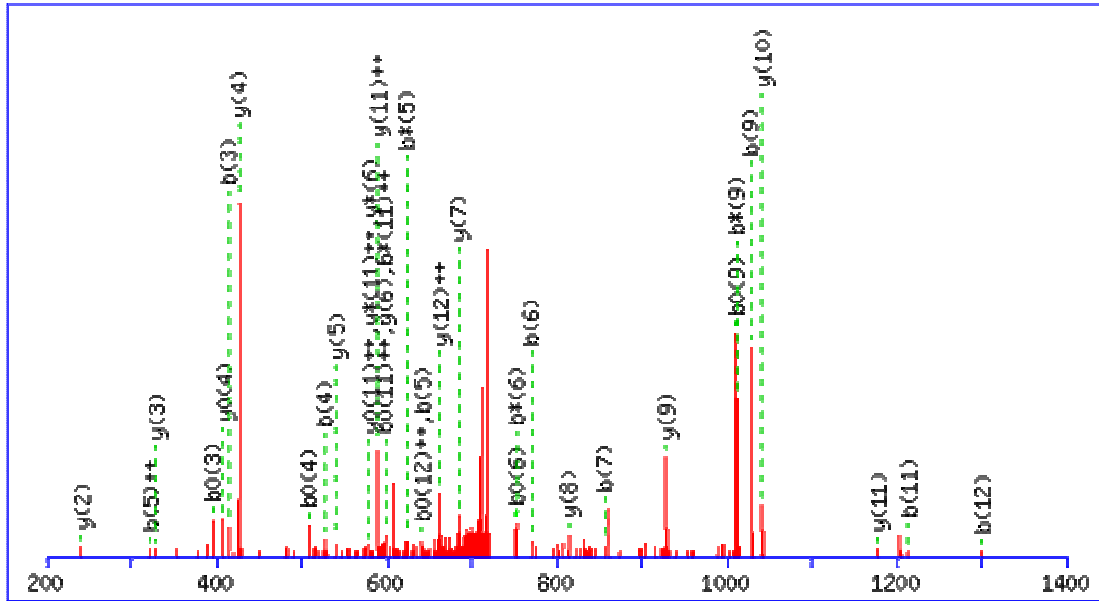

N9: Deamidation (NQ)

K13: Lysine (K-full)

| #  | b              | b <sup>++</sup> | b <sup>*</sup> | b <sup>+++</sup> | b <sup>0</sup> | b <sup>0++</sup> | Seq. | y              | y <sup>++</sup> | y <sup>*</sup> | y <sup>+++</sup> | y <sup>0</sup> | y <sup>0++</sup> | #  |
|----|----------------|-----------------|----------------|------------------|----------------|------------------|------|----------------|-----------------|----------------|------------------|----------------|------------------|----|
| 1  | 130.05         | 65.53           |                |                  | 112.04         | 56.52            | E    |                |                 |                |                  |                |                  | 13 |
| 2  | 277.12         | 139.06          |                |                  | 259.11         | 130.06           | F    | 1325.62        | <b>663.31</b>   | 1308.59        | 654.80           | 1307.61        | 654.31           | 12 |
| 3  | <b>414.18</b>  | 207.59          |                |                  | <b>396.17</b>  | 198.59           | H    | <b>1178.55</b> | <b>589.78</b>   | 1161.53        | <b>581.27</b>    | 1160.54        | <b>580.77</b>    | 11 |
| 4  | <b>527.26</b>  | 264.13          |                |                  | <b>509.25</b>  | 255.13           | L    | <b>1041.49</b> | 521.25          | 1024.47        | 512.74           | 1023.48        | 512.25           | 10 |
| 5  | <b>641.30</b>  | <b>321.16</b>   | <b>624.28</b>  | 312.64           | 623.29         | 312.15           | N    | <b>928.41</b>  | 464.71          | 911.38         | 456.20           | 910.40         | 455.70           | 9  |
| 6  | <b>770.35</b>  | 385.68          | <b>753.32</b>  | 377.16           | <b>752.34</b>  | 376.67           | E    | <b>814.37</b>  | 407.69          | 797.34         | 399.17           | 796.36         | 398.68           | 8  |
| 7  | <b>857.38</b>  | 429.19          | 840.35         | 420.68           | 839.37         | 420.19           | S    | <b>685.32</b>  | 343.17          | 668.30         | 334.65           | 667.31         | 334.16           | 7  |
| 8  | 914.40         | 457.70          | 897.37         | 449.19           | 896.39         | 448.70           | G    | <b>598.29</b>  | 299.65          | <b>581.27</b>  | 291.14           | 580.28         | 290.64           | 6  |
| 9  | <b>1029.43</b> | 515.22          | <b>1012.40</b> | 506.70           | <b>1011.42</b> | 506.21           | N    | <b>541.27</b>  | 271.14          | 524.24         | 262.63           | 523.26         | 262.13           | 5  |
| 10 | 1126.48        | 563.74          | 1109.45        | 555.23           | 1108.47        | 554.74           | P    | <b>426.24</b>  | 213.63          | 409.22         | 205.11           | <b>408.23</b>  | 204.62           | 4  |
| 11 | <b>1213.51</b> | 607.26          | 1196.49        | <b>598.75</b>    | 1195.50        | <b>598.25</b>    | S    | <b>329.19</b>  | 165.10          | 312.16         | 156.59           | 311.18         | 156.09           | 3  |
| 12 | <b>1300.54</b> | 650.78          | 1283.52        | 642.26           | 1282.53        | <b>641.77</b>    | S    | <b>242.16</b>  | 121.58          | 225.13         | 113.07           | 224.15         | 112.58           | 2  |
| 13 |                |                 |                |                  |                |                  | K    | 155.13         | 78.07           | 138.10         | 69.55            |                |                  | 1  |

Gene Symbol Sequences m/z Charge Ion score Expect  
 LOC645877 AEELIEK 416.227 2+ 41 0.014  
 (IPI00161095 Uncharacterized protein ENSP00000267785)

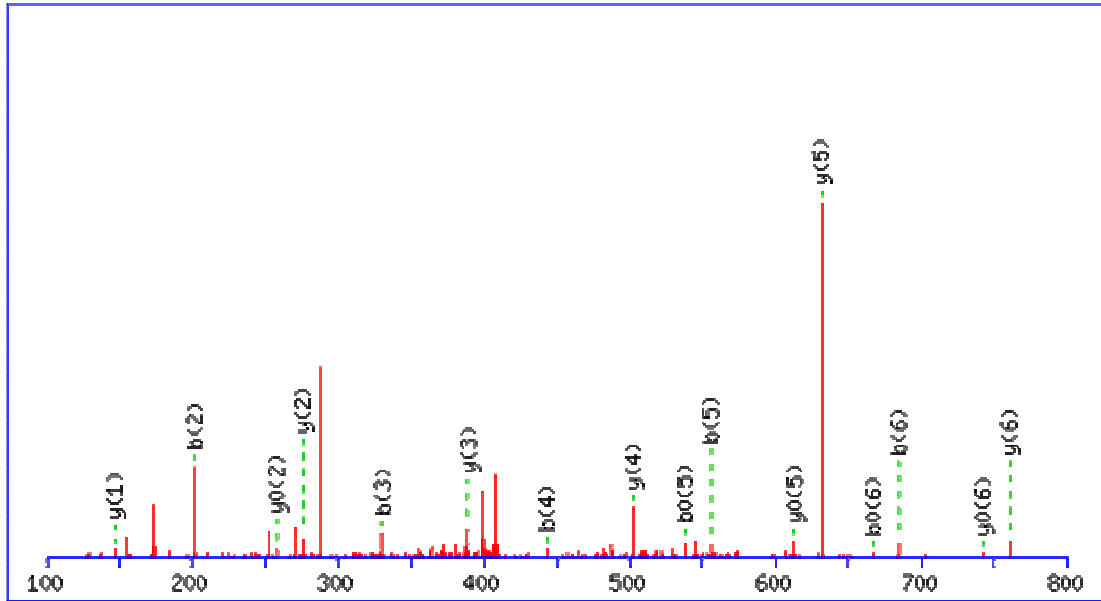

| # | b      | b <sup>++</sup> | b <sup>0</sup> | b <sup>0++</sup> | Seq. | y      | y <sup>++</sup> | y <sup>+</sup> | y <sup>+++</sup> | y <sup>0</sup> | y <sup>0++</sup> | # |
|---|--------|-----------------|----------------|------------------|------|--------|-----------------|----------------|------------------|----------------|------------------|---|
| 1 | 72.04  | 36.53           |                |                  | A    |        |                 |                |                  |                |                  | 7 |
| 2 | 201.09 | 101.05          | 183.08         | 92.04            | E    | 760.41 | 380.71          | 743.38         | 372.19           | 742.40         | 371.70           | 6 |
| 3 | 330.13 | 165.57          | 312.12         | 156.56           | E    | 631.37 | 316.19          | 614.34         | 307.67           | 613.36         | 307.18           | 5 |
| 4 | 443.21 | 222.11          | 425.20         | 213.11           | L    | 502.32 | 251.67          | 485.30         | 243.15           | 484.31         | 242.66           | 4 |
| 5 | 556.30 | 278.65          | 538.29         | 269.65           | I    | 389.24 | 195.12          | 372.21         | 186.61           | 371.23         | 186.12           | 3 |
| 6 | 685.34 | 343.17          | 667.33         | 334.17           | E    | 276.16 | 138.58          | 259.13         | 130.07           | 258.14         | 129.58           | 2 |
| 7 |        |                 |                |                  | K    | 147.11 | 74.06           | 130.09         | 65.55            |                |                  | 1 |

Gene Symbol Sequences m/z Charge Ion score Expect  
 MED29 VAAQNLIQNTNIDNGQK 920.983 2+ 90 1.2e-07  
 (IPI00032780 mediator complex subunit 29)

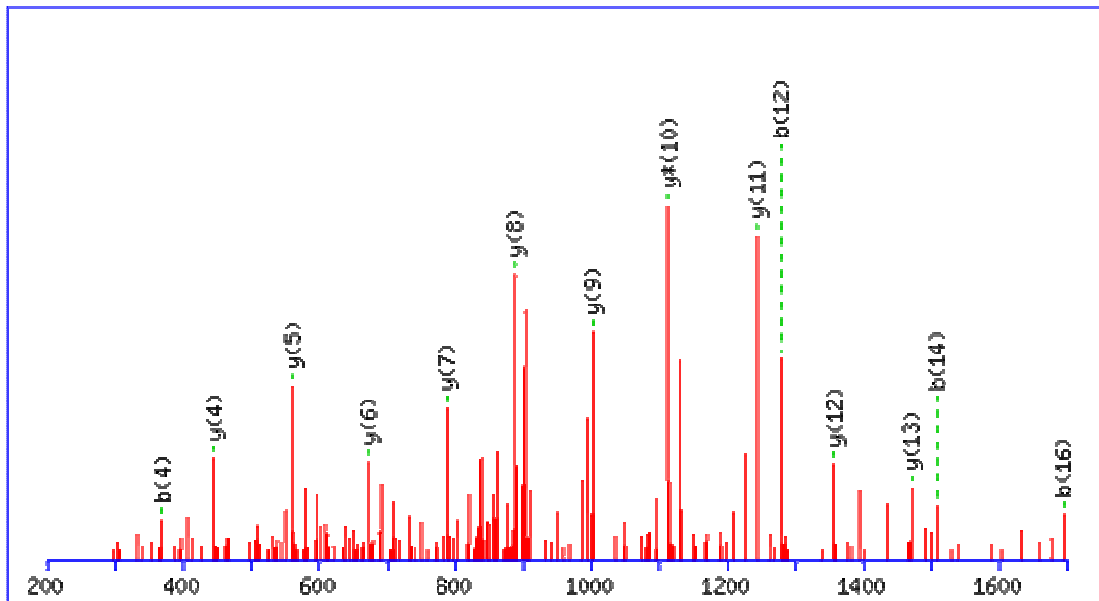

| #  | b              | b <sup>++</sup> | b <sup>*</sup> | b <sup>+++</sup> | b <sup>0</sup> | b <sup>0++</sup> | Seq. | y              | y <sup>++</sup> | y <sup>*</sup> | y <sup>+++</sup> | y <sup>0</sup> | y <sup>0++</sup> | #  |
|----|----------------|-----------------|----------------|------------------|----------------|------------------|------|----------------|-----------------|----------------|------------------|----------------|------------------|----|
| 1  | 100.08         | 50.54           |                |                  |                |                  | V    |                |                 |                |                  |                |                  | 17 |
| 2  | 171.11         | 86.06           |                |                  |                |                  | A    | 1741.88        | 871.45          | 1724.86        | 862.93           | 1723.87        | 862.44           | 16 |
| 3  | 242.15         | 121.58          |                |                  |                |                  | A    | 1670.85        | 835.93          | 1653.82        | 827.41           | 1652.84        | 826.92           | 15 |
| 4  | <b>370.21</b>  | 185.61          | 353.18         | 177.09           |                |                  | Q    | 1599.81        | 800.41          | 1582.78        | 791.89           | 1581.80        | 791.40           | 14 |
| 5  | 484.25         | 242.63          | 467.22         | 234.12           |                |                  | N    | <b>1471.75</b> | 736.38          | 1454.72        | 727.87           | 1453.74        | 727.37           | 13 |
| 6  | 597.34         | 299.17          | 580.31         | 290.66           |                |                  | L    | <b>1357.71</b> | 679.36          | 1340.68        | 670.84           | 1339.70        | 670.35           | 12 |
| 7  | 710.42         | 355.71          | 693.39         | 347.20           |                |                  | I    | <b>1244.62</b> | 622.82          | 1227.60        | 614.30           | 1226.61        | 613.81           | 11 |
| 8  | 838.48         | 419.74          | 821.45         | 411.23           |                |                  | Q    | 1131.54        | 566.27          | <b>1114.51</b> | 557.76           | 1113.53        | 557.27           | 10 |
| 9  | 952.52         | 476.76          | 935.49         | 468.25           |                |                  | N    | <b>1003.48</b> | 502.24          | 986.45         | 493.73           | 985.47         | 493.24           | 9  |
| 10 | 1053.57        | 527.29          | 1036.54        | 518.77           | 1035.56        | 518.28           | T    | <b>889.44</b>  | 445.22          | 872.41         | 436.71           | 871.43         | 436.22           | 8  |
| 11 | 1167.61        | 584.31          | 1150.59        | 575.80           | 1149.60        | 575.30           | N    | <b>788.39</b>  | 394.70          | 771.36         | 386.19           | 770.38         | 385.69           | 7  |
| 12 | <b>1280.70</b> | 640.85          | 1263.67        | 632.34           | 1262.69        | 631.85           | I    | <b>674.35</b>  | 337.68          | 657.32         | 329.16           | 656.34         | 328.67           | 6  |
| 13 | 1395.72        | 698.36          | 1378.70        | 689.85           | 1377.71        | 689.36           | D    | <b>561.26</b>  | 281.13          | 544.24         | 272.62           | 543.25         | 272.13           | 5  |
| 14 | <b>1509.77</b> | 755.39          | 1492.74        | 746.87           | 1491.76        | 746.38           | N    | <b>446.24</b>  | 223.62          | 429.21         | 215.11           |                |                  | 4  |
| 15 | 1566.79        | 783.90          | 1549.76        | 775.38           | 1548.78        | 774.89           | G    | 332.19         | 166.60          | 315.17         | 158.09           |                |                  | 3  |
| 16 | <b>1694.85</b> | 847.93          | 1677.82        | 839.41           | 1676.84        | 838.92           | Q    | 275.17         | 138.09          | 258.14         | 129.58           |                |                  | 2  |
| 17 |                |                 |                |                  |                |                  | K    | 147.11         | 74.06           | 130.09         | 65.55            |                |                  | 1  |

Gene Symbol Sequences m/z Charge Ion score Expect  
MTHFD2 LVGDVDFEGVRQK 731.392 2+ 58 0.0002  
(IPI00011307 Bifunctional methylenetetrahydrofolate dehydrogenase/cyclohydrolase)

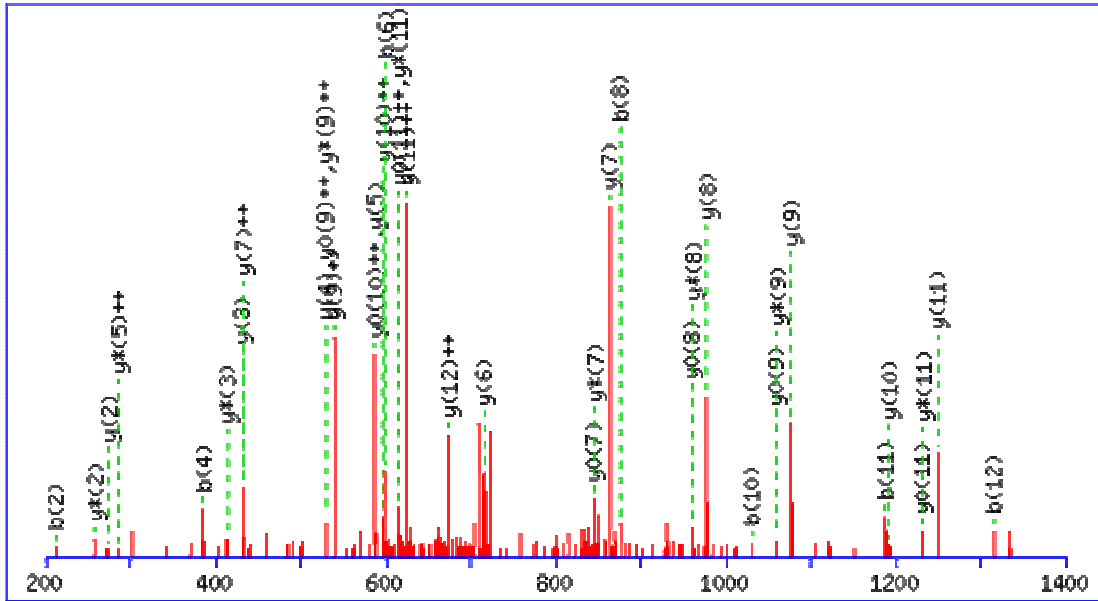

| #  | b              | b <sup>++</sup> | b <sup>+</sup> | b <sup>+++</sup> | b <sup>0</sup> | b <sup>0++</sup> | Seq. | y              | y <sup>++</sup> | y <sup>+</sup> | y <sup>+++</sup> | y <sup>0</sup> | y <sup>0++</sup> | #  |
|----|----------------|-----------------|----------------|------------------|----------------|------------------|------|----------------|-----------------|----------------|------------------|----------------|------------------|----|
| 1  | 114.09         | 57.55           |                |                  |                |                  | L    |                |                 |                |                  |                |                  | 13 |
| 2  | <b>213.16</b>  | 107.08          |                |                  |                |                  | V    | 1348.69        | <b>674.85</b>   | 1331.66        | 666.33           | 1330.67        | 665.84           | 12 |
| 3  | 270.18         | 135.59          |                |                  |                |                  | G    | <b>1249.62</b> | <b>625.31</b>   | <b>1232.59</b> | <b>616.80</b>    | <b>1231.61</b> | <b>616.31</b>    | 11 |
| 4  | <b>385.21</b>  | 193.11          |                |                  | 367.20         | 184.10           | D    | <b>1192.60</b> | <b>596.80</b>   | 1175.57        | 588.29           | 1174.59        | <b>587.80</b>    | 10 |
| 5  | 484.28         | 242.64          |                |                  | 466.27         | 233.64           | V    | <b>1077.57</b> | <b>539.29</b>   | <b>1060.54</b> | <b>530.77</b>    | <b>1059.56</b> | <b>530.28</b>    | 9  |
| 6  | <b>599.30</b>  | 300.16          |                |                  | 581.29         | 291.15           | D    | <b>978.50</b>  | 489.75          | <b>961.47</b>  | 481.24           | <b>960.49</b>  | 480.75           | 8  |
| 7  | 746.37         | 373.69          |                |                  | 728.36         | 364.68           | F    | <b>863.47</b>  | <b>432.24</b>   | <b>846.45</b>  | 423.73           | <b>845.46</b>  | 423.24           | 7  |
| 8  | <b>875.41</b>  | 438.21          |                |                  | 857.40         | 429.21           | E    | <b>716.40</b>  | 358.71          | 699.38         | 350.19           | 698.39         | 349.70           | 6  |
| 9  | 932.44         | 466.72          |                |                  | 914.43         | 457.72           | G    | <b>587.36</b>  | 294.18          | 570.34         | <b>285.67</b>    |                |                  | 5  |
| 10 | <b>1031.50</b> | 516.26          |                |                  | 1013.49        | 507.25           | V    | <b>530.34</b>  | 265.67          | 513.31         | 257.16           |                |                  | 4  |
| 11 | <b>1187.61</b> | 594.31          | 1170.58        | 585.79           | 1169.59        | 585.30           | R    | <b>431.27</b>  | 216.14          | <b>414.25</b>  | 207.63           |                |                  | 3  |
| 12 | <b>1315.66</b> | 658.34          | 1298.64        | 649.82           | 1297.65        | 649.33           | Q    | <b>275.17</b>  | 138.09          | <b>258.14</b>  | 129.58           |                |                  | 2  |
| 13 |                |                 |                |                  |                |                  | K    | 147.11         | 74.06           | 130.09         | 65.55            |                |                  | 1  |

Gene Symbol Sequences m/z Charge Ion score Expect  
 NACA2 IQDLSQQAQLAAAEK 807.923 2+ 105 5.1e-09  
 (IPI00007471 Nascent polypeptide-associated complex subunit alpha-2)

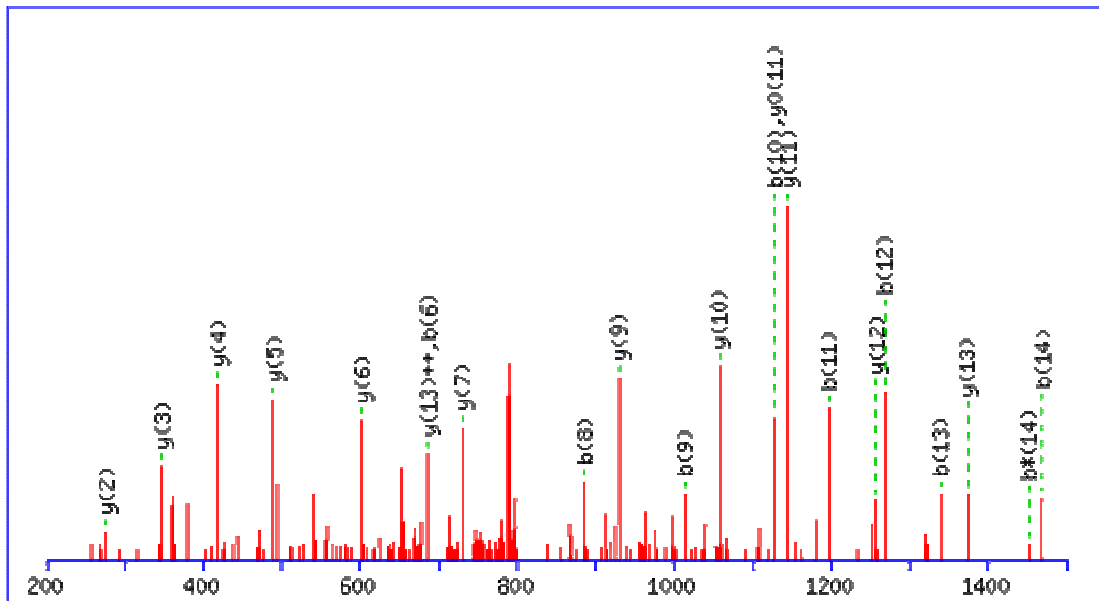

Q2: Deamidation (NQ)

| #  | b       | b <sup>++</sup> | b <sup>+</sup> | b <sup>+++</sup> | b <sup>0</sup> | b <sup>0++</sup> | Seq. | y       | y <sup>++</sup> | y <sup>+</sup> | y <sup>+++</sup> | y <sup>0</sup> | y <sup>0++</sup> | #  |
|----|---------|-----------------|----------------|------------------|----------------|------------------|------|---------|-----------------|----------------|------------------|----------------|------------------|----|
| 1  | 114.09  | 57.55           |                |                  |                |                  | I    |         |                 |                |                  |                |                  | 15 |
| 2  | 243.13  | 122.07          | 226.11         | 113.56           |                |                  | Q    | 1501.75 | 751.38          | 1484.72        | 742.86           | 1483.74        | 742.37           | 14 |
| 3  | 358.16  | 179.58          | 341.13         | 171.07           | 340.15         | 170.58           | D    | 1372.71 | 686.86          | 1355.68        | 678.34           | 1354.70        | 677.85           | 13 |
| 4  | 471.24  | 236.13          | 454.22         | 227.61           | 453.23         | 227.12           | L    | 1257.68 | 629.34          | 1240.65        | 620.83           | 1239.67        | 620.34           | 12 |
| 5  | 558.28  | 279.64          | 541.25         | 271.13           | 540.27         | 270.64           | S    | 1144.60 | 572.80          | 1127.57        | 564.29           | 1126.59        | 563.80           | 11 |
| 6  | 686.34  | 343.67          | 669.31         | 335.16           | 668.32         | 334.67           | Q    | 1057.56 | 529.29          | 1040.54        | 520.77           | 1039.55        | 520.28           | 10 |
| 7  | 814.39  | 407.70          | 797.37         | 399.19           | 796.38         | 398.70           | Q    | 929.51  | 465.26          | 912.48         | 456.74           | 911.49         | 456.25           | 9  |
| 8  | 885.43  | 443.22          | 868.40         | 434.71           | 867.42         | 434.21           | A    | 801.45  | 401.23          | 784.42         | 392.71           | 783.44         | 392.22           | 8  |
| 9  | 1013.49 | 507.25          | 996.46         | 498.74           | 995.48         | 498.24           | Q    | 730.41  | 365.71          | 713.38         | 357.20           | 712.40         | 356.70           | 7  |
| 10 | 1126.57 | 563.79          | 1109.55        | 555.28           | 1108.56        | 554.79           | L    | 602.35  | 301.68          | 585.32         | 293.17           | 584.34         | 292.67           | 6  |
| 11 | 1197.61 | 599.31          | 1180.58        | 590.80           | 1179.60        | 590.30           | A    | 489.27  | 245.14          | 472.24         | 236.62           | 471.26         | 236.13           | 5  |
| 12 | 1268.65 | 634.83          | 1251.62        | 626.31           | 1250.64        | 625.82           | A    | 418.23  | 209.62          | 401.20         | 201.11           | 400.22         | 200.61           | 4  |
| 13 | 1339.69 | 670.35          | 1322.66        | 661.83           | 1321.67        | 661.34           | A    | 347.19  | 174.10          | 330.17         | 165.59           | 329.18         | 165.09           | 3  |
| 14 | 1468.73 | 734.87          | 1451.70        | 726.35           | 1450.72        | 725.86           | E    | 276.16  | 138.58          | 259.13         | 130.07           | 258.14         | 129.58           | 2  |
| 15 |         |                 |                |                  |                |                  | K    | 147.11  | 74.06           | 130.09         | 65.55            |                |                  | 1  |

**Gene Symbol**                      **Sequences**                      **m/z**    **Charge**    **Ion score**    **Expect**  
 NXT1                      ASVDFKTYVDQACR    851.400    2+                      46                      0.0029  
 (IPI00007605 NTF2-related export protein 1)

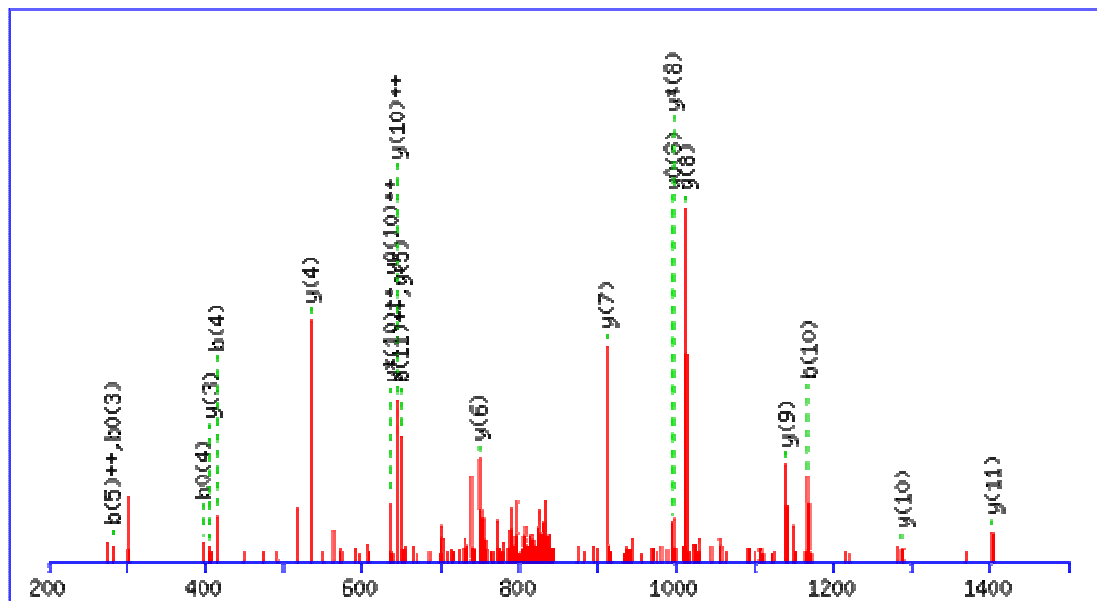

N-term : N-Acetyl (Protein)

C13: Carbamidomethylated

| #  | b       | b <sup>++</sup> | b <sup>*</sup> | b <sup>*++</sup> | b <sup>0</sup> | b <sup>0++</sup> | Seq. | y       | y <sup>++</sup> | y <sup>*</sup> | y <sup>*++</sup> | y <sup>0</sup> | y <sup>0++</sup> | #  |
|----|---------|-----------------|----------------|------------------|----------------|------------------|------|---------|-----------------|----------------|------------------|----------------|------------------|----|
| 1  | 114.05  | 57.53           |                |                  |                |                  | A    |         |                 |                |                  |                |                  | 14 |
| 2  | 201.09  | 101.05          |                |                  | 183.08         | 92.04            | S    | 1588.74 | 794.87          | 1571.72        | 786.36           | 1570.73        | 785.87           | 13 |
| 3  | 300.16  | 150.58          |                |                  | 282.14         | 141.58           | V    | 1501.71 | 751.36          | 1484.68        | 742.85           | 1483.70        | 742.35           | 12 |
| 4  | 415.18  | 208.09          |                |                  | 397.17         | 199.09           | D    | 1402.64 | 701.82          | 1385.62        | 693.31           | 1384.63        | 692.82           | 11 |
| 5  | 562.25  | 281.63          |                |                  | 544.24         | 272.62           | F    | 1287.62 | 644.31          | 1270.59        | 635.80           | 1269.60        | 635.31           | 10 |
| 6  | 690.35  | 345.68          | 673.32         | 337.16           | 672.34         | 336.67           | K    | 1140.55 | 570.78          | 1123.52        | 562.26           | 1122.54        | 561.77           | 9  |
| 7  | 791.39  | 396.20          | 774.37         | 387.69           | 773.38         | 387.20           | T    | 1012.45 | 506.73          | 995.43         | 498.22           | 994.44         | 497.72           | 8  |
| 8  | 954.46  | 477.73          | 937.43         | 469.22           | 936.45         | 468.73           | Y    | 911.40  | 456.21          | 894.38         | 447.69           | 893.39         | 447.20           | 7  |
| 9  | 1053.53 | 527.27          | 1036.50        | 518.75           | 1035.51        | 518.26           | V    | 748.34  | 374.67          | 731.31         | 366.16           | 730.33         | 365.67           | 6  |
| 10 | 1168.55 | 584.78          | 1151.53        | 576.27           | 1150.54        | 575.77           | D    | 649.27  | 325.14          | 632.25         | 316.63           | 631.26         | 316.13           | 5  |
| 11 | 1296.61 | 648.81          | 1279.58        | 640.30           | 1278.60        | 639.80           | Q    | 534.25  | 267.63          | 517.22         | 259.11           |                |                  | 4  |
| 12 | 1367.65 | 684.33          | 1350.62        | 675.81           | 1349.64        | 675.32           | A    | 406.19  | 203.60          | 389.16         | 195.08           |                |                  | 3  |
| 13 | 1527.68 | 764.34          | 1510.65        | 755.83           | 1509.67        | 755.34           | C    | 335.15  | 168.08          | 318.12         | 159.57           |                |                  | 2  |
| 14 |         |                 |                |                  |                |                  | R    | 175.12  | 88.06           | 158.09         | 79.55            |                |                  | 1  |

**Gene Symbol**                      **Sequences**                      **m/z**      **Charge**      **Ion score**      **Expect**  
 OGT                      ASSVGNVADSTEPTKR      830.912      2+                      76                      4.3e-06  
**(IPI00005780 Isoform 3 of UDP-N-acetylglucosamine--peptide N-acetylglucosaminyltrans)**

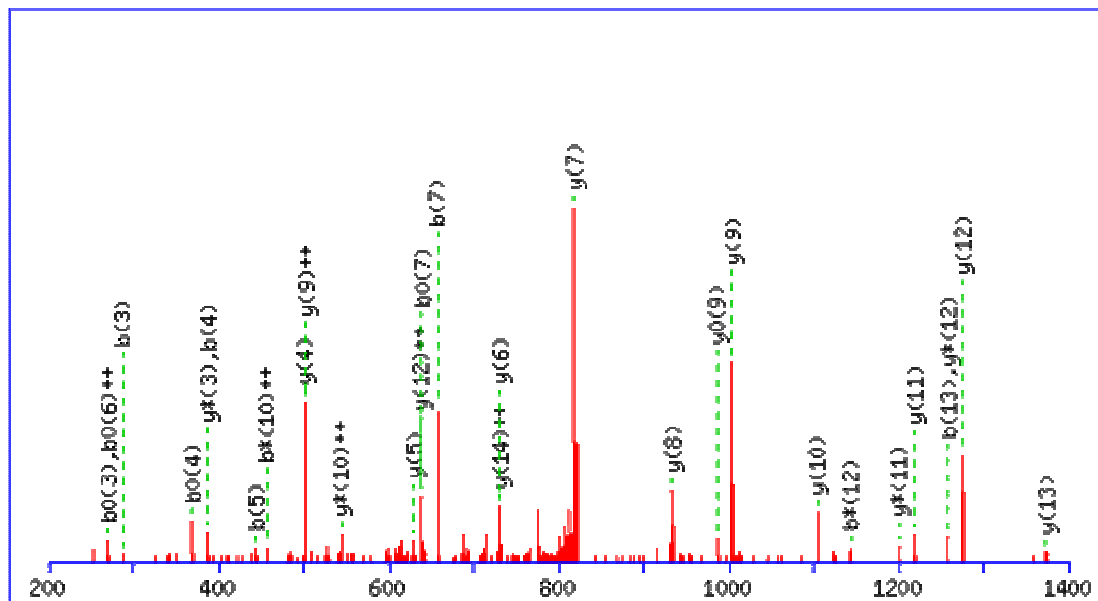

N-term : N-Acetyl (Protein)

| #  | b              | b <sup>++</sup> | b <sup>+</sup> | b <sup>+++</sup> | b <sup>0</sup> | b <sup>0++</sup> | Seq. | y              | y <sup>++</sup> | y <sup>+</sup> | y <sup>+++</sup> | y <sup>0</sup> | y <sup>0++</sup> | #  |
|----|----------------|-----------------|----------------|------------------|----------------|------------------|------|----------------|-----------------|----------------|------------------|----------------|------------------|----|
| 1  | 114.05         | 57.53           |                |                  |                |                  | A    |                |                 |                |                  |                |                  | 16 |
| 2  | 201.09         | 101.05          |                |                  | 183.08         | 92.04            | S    | 1547.77        | 774.39          | 1530.74        | 765.87           | 1529.76        | 765.38           | 15 |
| 3  | <b>288.12</b>  | 144.56          |                |                  | <b>270.11</b>  | 135.56           | S    | 1460.73        | <b>730.87</b>   | 1443.71        | 722.36           | 1442.72        | 721.87           | 14 |
| 4  | <b>387.19</b>  | 194.10          |                |                  | <b>369.18</b>  | 185.09           | V    | <b>1373.70</b> | 687.35          | 1356.68        | 678.84           | 1355.69        | 678.35           | 13 |
| 5  | <b>444.21</b>  | 222.61          |                |                  | 426.20         | 213.60           | G    | <b>1274.63</b> | <b>637.82</b>   | <b>1257.61</b> | 629.31           | 1256.62        | 628.82           | 12 |
| 6  | 558.25         | 279.63          | 541.23         | 271.12           | 540.24         | <b>270.62</b>    | N    | <b>1217.61</b> | 609.31          | <b>1200.59</b> | 600.80           | 1199.60        | 600.30           | 11 |
| 7  | <b>657.32</b>  | 329.16          | 640.29         | 320.65           | <b>639.31</b>  | 320.16           | V    | <b>1103.57</b> | 552.29          | 1086.54        | <b>543.77</b>    | 1085.56        | 543.28           | 10 |
| 8  | 728.36         | 364.68          | 711.33         | 356.17           | 710.35         | 355.68           | A    | <b>1004.50</b> | <b>502.75</b>   | 987.47         | 494.24           | <b>986.49</b>  | 493.75           | 9  |
| 9  | 843.38         | 422.20          | 826.36         | 413.68           | 825.37         | 413.19           | D    | <b>933.46</b>  | 467.24          | 916.44         | 458.72           | 915.45         | 458.23           | 8  |
| 10 | 930.42         | 465.71          | 913.39         | <b>457.20</b>    | 912.41         | 456.71           | S    | <b>818.44</b>  | 409.72          | 801.41         | 401.21           | 800.43         | 400.72           | 7  |
| 11 | 1031.46        | 516.24          | 1014.44        | 507.72           | 1013.45        | 507.23           | T    | <b>731.40</b>  | 366.21          | 714.38         | 357.69           | 713.39         | 357.20           | 6  |
| 12 | 1160.51        | 580.76          | <b>1143.48</b> | 572.24           | 1142.50        | 571.75           | E    | <b>630.36</b>  | 315.68          | 613.33         | 307.17           | 612.35         | 306.68           | 5  |
| 13 | <b>1257.56</b> | 629.28          | 1240.53        | 620.77           | 1239.55        | 620.28           | P    | <b>501.31</b>  | 251.16          | 484.29         | 242.65           | 483.30         | 242.16           | 4  |
| 14 | 1358.61        | 679.81          | 1341.58        | 671.29           | 1340.60        | 670.80           | T    | 404.26         | 202.63          | <b>387.24</b>  | 194.12           | 386.25         | 193.63           | 3  |
| 15 | 1486.70        | 743.85          | 1469.68        | 735.34           | 1468.69        | 734.85           | K    | 303.21         | 152.11          | 286.19         | 143.60           |                |                  | 2  |
| 16 |                |                 |                |                  |                |                  | R    | 175.12         | 88.06           | 158.09         | 79.55            |                |                  | 1  |

Gene Symbol Sequences m/z Charge Ion score Expect  
PBLD MKLPIFIADAFTAR 531.968 3+ 55 0.00021  
(IPI00024896 Phenazine biosynthesis-like domain-containing protein)

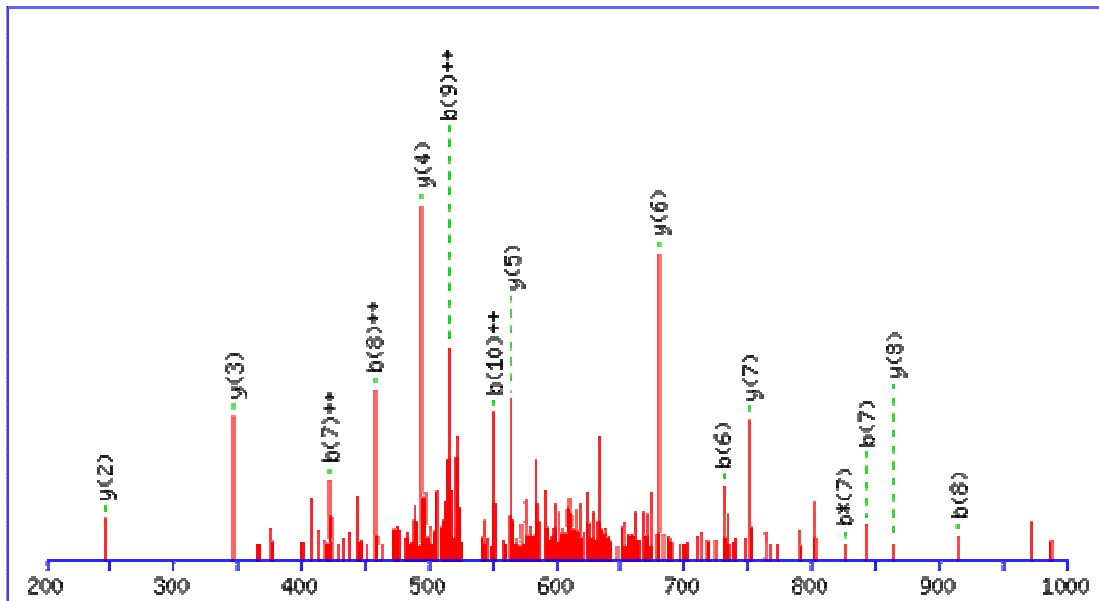

| #  | b             | b <sup>++</sup> | b <sup>+</sup> | b <sup>+++</sup> | b <sup>0</sup> | b <sup>0++</sup> | Seq. | y             | y <sup>++</sup> | y <sup>+</sup> | y <sup>+++</sup> | y <sup>0</sup> | y <sup>0++</sup> | #  |
|----|---------------|-----------------|----------------|------------------|----------------|------------------|------|---------------|-----------------|----------------|------------------|----------------|------------------|----|
| 1  | 132.05        | 66.53           |                |                  |                |                  | M    |               |                 |                |                  |                |                  | 14 |
| 2  | 260.14        | 130.57          | 243.12         | 122.06           |                |                  | K    | 1462.84       | 731.92          | 1445.82        | 723.41           | 1444.83        | 722.92           | 13 |
| 3  | 373.23        | 187.12          | 356.20         | 178.60           |                |                  | L    | 1334.75       | 667.88          | 1317.72        | 659.36           | 1316.74        | 658.87           | 12 |
| 4  | 470.28        | 235.64          | 453.25         | 227.13           |                |                  | P    | 1221.66       | 611.33          | 1204.64        | 602.82           | 1203.65        | 602.33           | 11 |
| 5  | 583.36        | 292.19          | 566.34         | 283.67           |                |                  | I    | 1124.61       | 562.81          | 1107.58        | 554.30           | 1106.60        | 553.80           | 10 |
| 6  | <b>730.43</b> | 365.72          | 713.41         | 357.21           |                |                  | F    | 1011.53       | 506.27          | 994.50         | 497.75           | 993.52         | 497.26           | 9  |
| 7  | <b>843.52</b> | <b>422.26</b>   | <b>826.49</b>  | 413.75           |                |                  | I    | <b>864.46</b> | 432.73          | 847.43         | 424.22           | 846.45         | 423.73           | 8  |
| 8  | <b>914.55</b> | <b>457.78</b>   | 897.53         | 449.27           |                |                  | A    | <b>751.37</b> | 376.19          | 734.35         | 367.68           | 733.36         | 367.19           | 7  |
| 9  | 1029.58       | <b>515.29</b>   | 1012.55        | 506.78           | 1011.57        | 506.29           | D    | <b>680.34</b> | 340.67          | 663.31         | 332.16           | 662.33         | 331.67           | 6  |
| 10 | 1100.62       | <b>550.81</b>   | 1083.59        | 542.30           | 1082.61        | 541.81           | A    | <b>565.31</b> | 283.16          | 548.28         | 274.64           | 547.30         | 274.15           | 5  |
| 11 | 1247.69       | 624.35          | 1230.66        | 615.83           | 1229.68        | 615.34           | F    | <b>494.27</b> | 247.64          | 477.25         | 239.13           | 476.26         | 238.63           | 4  |
| 12 | 1348.73       | 674.87          | 1331.71        | 666.36           | 1330.72        | 665.87           | T    | <b>347.20</b> | 174.11          | 330.18         | 165.59           | 329.19         | 165.10           | 3  |
| 13 | 1419.77       | 710.39          | 1402.74        | 701.88           | 1401.76        | 701.38           | A    | <b>246.16</b> | 123.58          | 229.13         | 115.07           |                |                  | 2  |
| 14 |               |                 |                |                  |                |                  | R    | 175.12        | 88.06           | 158.09         | 79.55            |                |                  | 1  |



Gene Symbol Sequences m/z Charge Ion score Expect  
 PFDN5 IQQLTALGAAQATAKA 778.445 2+ 105 1.7e-09  
 (IPI00015361 Prefoldin subunit 5)

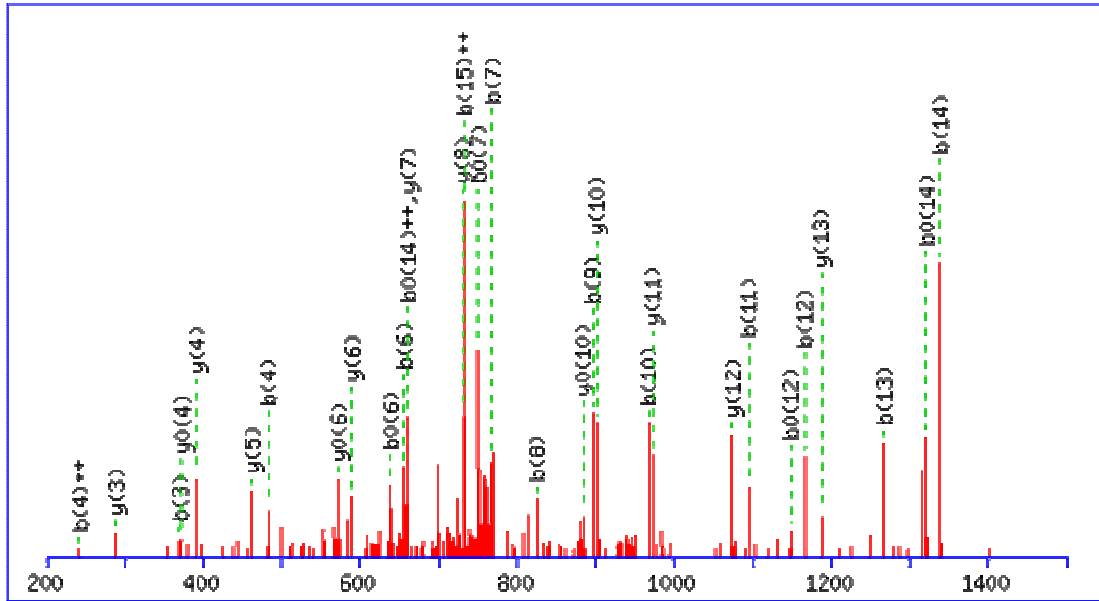

| #  | b              | b <sup>++</sup> | b <sup>+</sup> | b <sup>+++</sup> | b <sup>0</sup> | b <sup>0++</sup> | Seq. | y              | y <sup>++</sup> | y <sup>+</sup> | y <sup>+++</sup> | y <sup>0</sup> | y <sup>0++</sup> | #  |
|----|----------------|-----------------|----------------|------------------|----------------|------------------|------|----------------|-----------------|----------------|------------------|----------------|------------------|----|
| 1  | 114.09         | 57.55           |                |                  |                |                  | I    |                |                 |                |                  |                |                  | 16 |
| 2  | <b>242.15</b>  | 121.58          | 225.12         | 113.07           |                |                  | Q    | 1442.80        | 721.90          | 1425.77        | 713.39           | 1424.79        | 712.90           | 15 |
| 3  | <b>370.21</b>  | 185.61          | 353.18         | 177.09           |                |                  | Q    | 1314.74        | 657.87          | 1297.71        | 649.36           | 1296.73        | 648.87           | 14 |
| 4  | <b>483.29</b>  | <b>242.15</b>   | 466.27         | 233.64           |                |                  | L    | <b>1186.68</b> | 593.84          | 1169.65        | 585.33           | 1168.67        | 584.84           | 13 |
| 5  | 584.34         | 292.67          | 567.31         | 284.16           | 566.33         | 283.67           | T    | <b>1073.59</b> | 537.30          | 1056.57        | 528.79           | 1055.58        | 528.30           | 12 |
| 6  | <b>655.38</b>  | 328.19          | 638.35         | 319.68           | <b>637.37</b>  | 319.19           | A    | <b>972.55</b>  | 486.78          | 955.52         | 478.26           | 954.54         | 477.77           | 11 |
| 7  | <b>768.46</b>  | 384.73          | 751.43         | 376.22           | <b>750.45</b>  | 375.73           | L    | <b>901.51</b>  | 451.26          | 884.48         | 442.75           | <b>883.50</b>  | 442.25           | 10 |
| 8  | <b>825.48</b>  | 413.25          | 808.46         | 404.73           | 807.47         | 404.24           | G    | 788.43         | 394.72          | 771.40         | 386.20           | 770.42         | 385.71           | 9  |
| 9  | <b>896.52</b>  | 448.76          | 879.49         | 440.25           | 878.51         | 439.76           | A    | <b>731.40</b>  | 366.21          | 714.38         | 357.69           | 713.39         | 357.20           | 8  |
| 10 | <b>967.56</b>  | 484.28          | 950.53         | 475.77           | 949.55         | 475.28           | A    | <b>660.37</b>  | 330.69          | 643.34         | 322.17           | 642.36         | 321.68           | 7  |
| 11 | <b>1095.62</b> | 548.31          | 1078.59        | 539.80           | 1077.61        | 539.31           | Q    | <b>589.33</b>  | 295.17          | 572.30         | 286.66           | <b>571.32</b>  | 286.16           | 6  |
| 12 | <b>1166.65</b> | 583.83          | 1149.63        | 575.32           | <b>1148.64</b> | 574.82           | A    | <b>461.27</b>  | 231.14          | 444.25         | 222.63           | 443.26         | 222.13           | 5  |
| 13 | <b>1267.70</b> | 634.35          | 1250.67        | 625.84           | 1249.69        | 625.35           | T    | <b>390.23</b>  | 195.62          | 373.21         | 187.11           | <b>372.22</b>  | 186.62           | 4  |
| 14 | <b>1338.74</b> | 669.87          | 1321.71        | 661.36           | <b>1320.73</b> | <b>660.87</b>    | A    | <b>289.19</b>  | 145.10          | 272.16         | 136.58           |                |                  | 3  |
| 15 | 1466.83        | <b>733.92</b>   | 1449.81        | 725.41           | 1448.82        | 724.91           | K    | 218.15         | 109.58          | 201.12         | 101.07           |                |                  | 2  |
| 16 |                |                 |                |                  |                |                  | A    | 90.05          | 45.53           |                |                  |                |                  | 1  |

Gene Symbol Sequences m/z Charge Ion score Expect  
PICALM ATTLNAVSSLASTGLSLTK 961.535 2+ 99 6.8e-09  
(IPI00216184 Isoform 2 of Phosphatidylinositol-binding clathrin assembly protein)

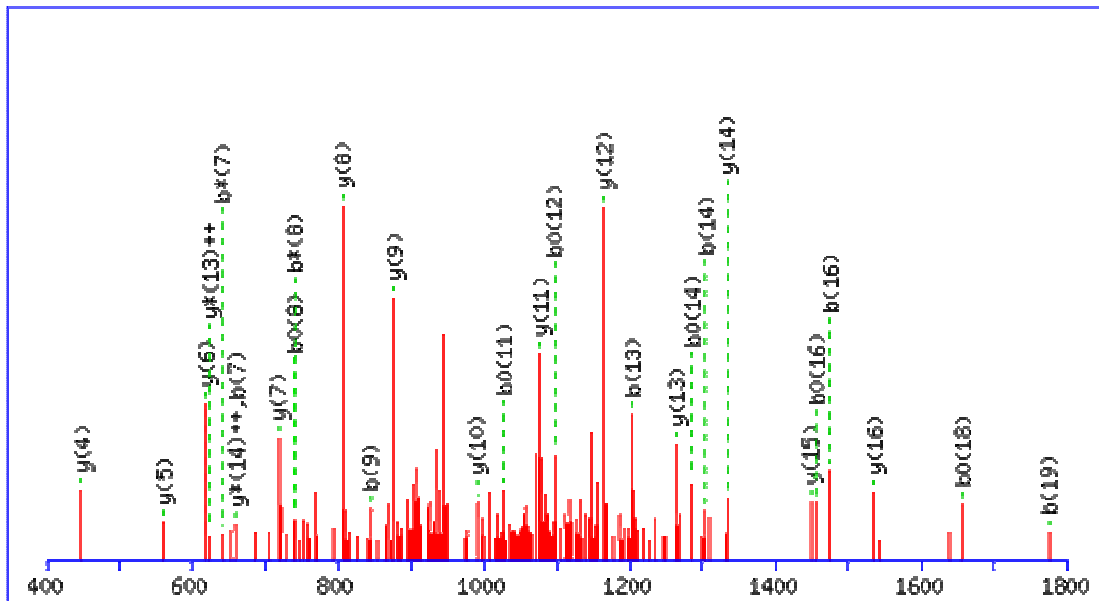

| #  | b       | b <sup>++</sup> | b <sup>+</sup> | b <sup>+++</sup> | b <sup>0</sup> | b <sup>0++</sup> | Seq. | y       | y <sup>++</sup> | y <sup>*</sup> | y <sup>+++</sup> | y <sup>0</sup> | y <sup>0++</sup> | #  |
|----|---------|-----------------|----------------|------------------|----------------|------------------|------|---------|-----------------|----------------|------------------|----------------|------------------|----|
| 1  | 72.04   | 36.53           |                |                  |                |                  | A    |         |                 |                |                  |                |                  | 20 |
| 2  | 173.09  | 87.05           |                |                  | 155.08         | 78.04            | T    | 1851.01 | 926.01          | 1833.98        | 917.49           | 1833.00        | 917.00           | 19 |
| 3  | 274.14  | 137.57          |                |                  | 256.13         | 128.57           | T    | 1749.96 | 875.48          | 1732.93        | 866.97           | 1731.95        | 866.48           | 18 |
| 4  | 387.22  | 194.12          |                |                  | 369.21         | 185.11           | L    | 1648.91 | 824.96          | 1631.89        | 816.45           | 1630.90        | 815.95           | 17 |
| 5  | 474.26  | 237.63          |                |                  | 456.25         | 228.63           | S    | 1535.83 | 768.42          | 1518.80        | 759.90           | 1517.82        | 759.41           | 16 |
| 6  | 588.30  | 294.65          | 571.27         | 286.14           | 570.29         | 285.65           | N    | 1448.80 | 724.90          | 1431.77        | 716.39           | 1430.78        | 715.90           | 15 |
| 7  | 659.34  | 330.17          | 642.31         | 321.66           | 641.33         | 321.17           | A    | 1334.75 | 667.88          | 1317.73        | 659.37           | 1316.74        | 658.87           | 14 |
| 8  | 758.40  | 379.71          | 741.38         | 371.19           | 740.39         | 370.70           | V    | 1263.72 | 632.36          | 1246.69        | 623.85           | 1245.70        | 623.36           | 13 |
| 9  | 845.44  | 423.22          | 828.41         | 414.71           | 827.43         | 414.22           | S    | 1164.65 | 582.83          | 1147.62        | 574.31           | 1146.64        | 573.82           | 12 |
| 10 | 932.47  | 466.74          | 915.44         | 458.22           | 914.46         | 457.73           | S    | 1077.62 | 539.31          | 1060.59        | 530.80           | 1059.60        | 530.31           | 11 |
| 11 | 1045.55 | 523.28          | 1028.53        | 514.77           | 1027.54        | 514.27           | L    | 990.58  | 495.80          | 973.56         | 487.28           | 972.57         | 486.79           | 10 |
| 12 | 1116.59 | 558.80          | 1099.56        | 550.29           | 1098.58        | 549.79           | A    | 877.50  | 439.25          | 860.47         | 430.74           | 859.49         | 430.25           | 9  |
| 13 | 1203.62 | 602.31          | 1186.59        | 593.80           | 1185.61        | 593.31           | S    | 806.46  | 403.73          | 789.44         | 395.22           | 788.45         | 394.73           | 8  |
| 14 | 1304.67 | 652.84          | 1287.64        | 644.32           | 1286.66        | 643.83           | T    | 719.43  | 360.22          | 702.40         | 351.71           | 701.42         | 351.21           | 7  |
| 15 | 1361.69 | 681.35          | 1344.66        | 672.84           | 1343.68        | 672.34           | G    | 618.38  | 309.69          | 601.36         | 301.18           | 600.37         | 300.69           | 6  |
| 16 | 1474.77 | 737.89          | 1457.75        | 729.38           | 1456.76        | 728.89           | L    | 561.36  | 281.18          | 544.33         | 272.67           | 543.35         | 272.18           | 5  |
| 17 | 1561.81 | 781.41          | 1544.78        | 772.89           | 1543.80        | 772.40           | S    | 448.28  | 224.64          | 431.25         | 216.13           | 430.27         | 215.64           | 4  |
| 18 | 1674.89 | 837.95          | 1657.86        | 829.44           | 1656.88        | 828.94           | L    | 361.24  | 181.13          | 344.22         | 172.61           | 343.23         | 172.12           | 3  |
| 19 | 1775.94 | 888.47          | 1758.91        | 879.96           | 1757.93        | 879.47           | T    | 248.16  | 124.58          | 231.13         | 116.07           | 230.15         | 115.58           | 2  |
| 20 |         |                 |                |                  |                |                  | K    | 147.11  | 74.06           | 130.09         | 65.55            |                |                  | 1  |

Gene Symbol Sequences m/z Charge Ion score Expect  
 PTBP2 VTNILMLK 466.287 2+ 60 4.5e-05  
 (IPI00254162 Isoform 3 of Polypyrimidine tract-binding protein 2)

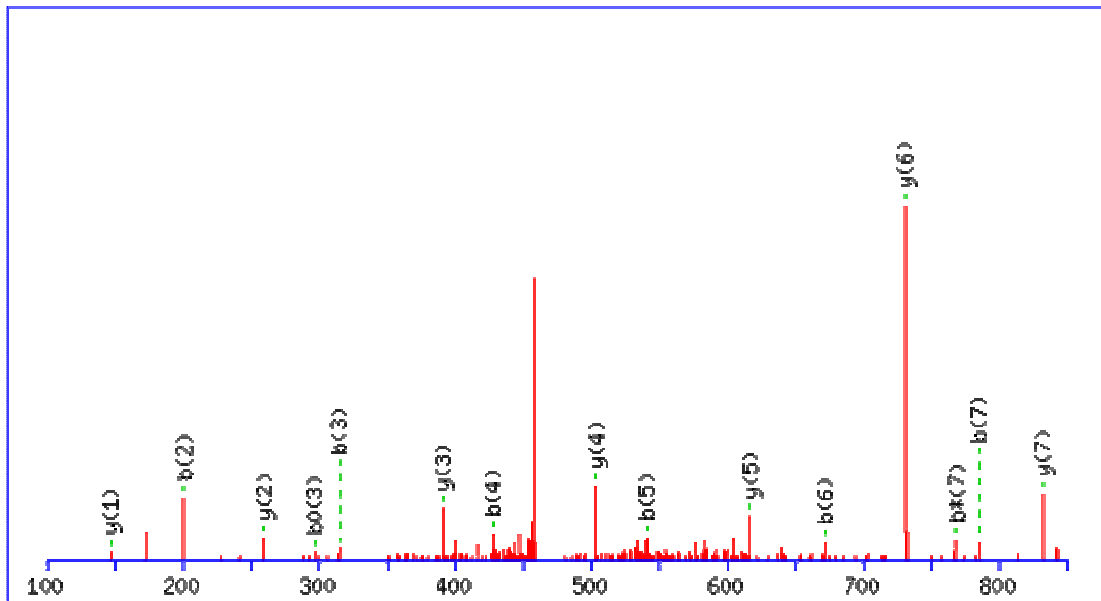

| # | b      | b <sup>++</sup> | b <sup>*</sup> | b <sup>+++</sup> | b <sup>0</sup> | b <sup>0++</sup> | Seq. | y      | y <sup>++</sup> | y <sup>*</sup> | y <sup>+++</sup> | y <sup>0</sup> | y <sup>0++</sup> | # |
|---|--------|-----------------|----------------|------------------|----------------|------------------|------|--------|-----------------|----------------|------------------|----------------|------------------|---|
| 1 | 100.08 | 50.54           |                |                  |                |                  | V    |        |                 |                |                  |                |                  | 8 |
| 2 | 201.12 | 101.07          |                |                  | 183.11         | 92.06            | T    | 832.50 | 416.75          | 815.47         | 408.24           | 814.49         | 407.75           | 7 |
| 3 | 315.17 | 158.09          | 298.14         | 149.57           | 297.16         | 149.08           | N    | 731.45 | 366.23          | 714.42         | 357.71           |                |                  | 6 |
| 4 | 428.25 | 214.63          | 411.22         | 206.12           | 410.24         | 205.62           | I    | 617.41 | 309.21          | 600.38         | 300.69           |                |                  | 5 |
| 5 | 541.33 | 271.17          | 524.31         | 262.66           | 523.32         | 262.17           | L    | 504.32 | 252.66          | 487.29         | 244.15           |                |                  | 4 |
| 6 | 672.37 | 336.69          | 655.35         | 328.18           | 654.36         | 327.69           | M    | 391.24 | 196.12          | 374.21         | 187.61           |                |                  | 3 |
| 7 | 785.46 | 393.23          | 768.43         | 384.72           | 767.45         | 384.23           | L    | 260.20 | 130.60          | 243.17         | 122.09           |                |                  | 2 |
| 8 |        |                 |                |                  |                |                  | K    | 147.11 | 74.06           | 130.09         | 65.55            |                |                  | 1 |

Gene Symbol Sequences m/z Charge Ion score Expect  
 PYCR1 LGAQALLGAAK 510.820 2+ 94 9.4e-09  
 (IPI00376503 pyrroline-5-carboxylate reductase 1 isoform 2)

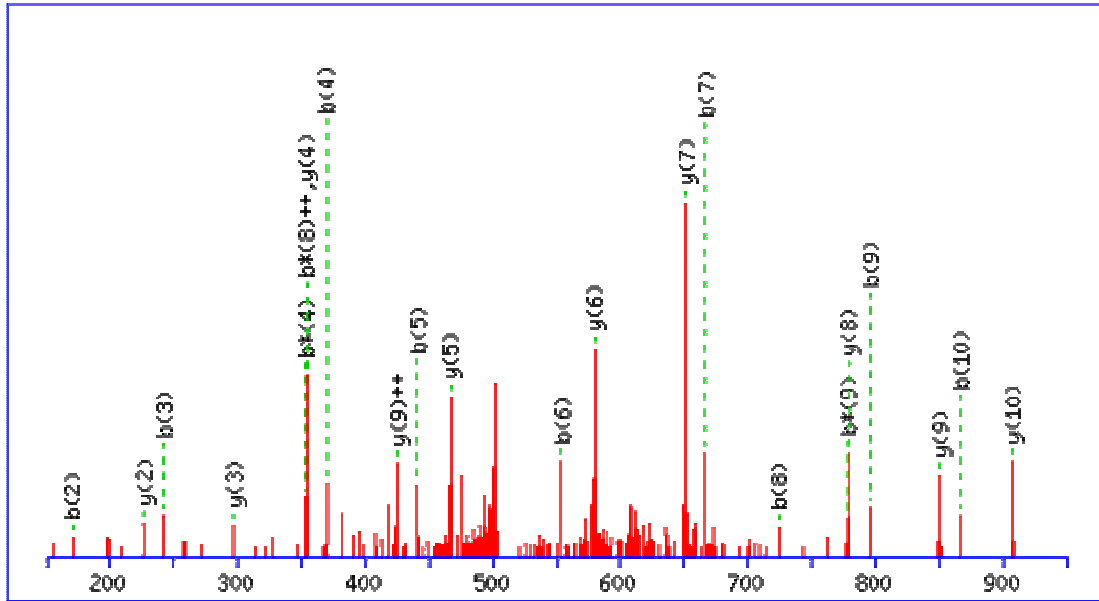

K11: Lysine (K-full)

| #  | b      | b <sup>++</sup> | b <sup>*</sup> | b <sup>+++</sup> | Seq. | y      | y <sup>++</sup> | y <sup>*</sup> | y <sup>+++</sup> | #  |
|----|--------|-----------------|----------------|------------------|------|--------|-----------------|----------------|------------------|----|
| 1  | 114.09 | 57.55           |                |                  | L    |        |                 |                |                  | 11 |
| 2  | 171.11 | 86.06           |                |                  | G    | 907.55 | 454.28          | 890.52         | 445.76           | 10 |
| 3  | 242.15 | 121.58          |                |                  | A    | 850.52 | 425.77          | 833.50         | 417.25           | 9  |
| 4  | 370.21 | 185.61          | 353.18         | 177.09           | Q    | 779.49 | 390.25          | 762.46         | 381.73           | 8  |
| 5  | 441.25 | 221.13          | 424.22         | 212.61           | A    | 651.43 | 326.22          | 634.40         | 317.70           | 7  |
| 6  | 554.33 | 277.67          | 537.30         | 269.16           | L    | 580.39 | 290.70          | 563.36         | 282.19           | 6  |
| 7  | 667.41 | 334.21          | 650.39         | 325.70           | L    | 467.31 | 234.16          | 450.28         | 225.64           | 5  |
| 8  | 724.44 | 362.72          | 707.41         | 354.21           | G    | 354.22 | 177.61          | 337.20         | 169.10           | 4  |
| 9  | 795.47 | 398.24          | 778.45         | 389.73           | A    | 297.20 | 149.10          | 280.17         | 140.59           | 3  |
| 10 | 866.51 | 433.76          | 849.48         | 425.25           | A    | 226.16 | 113.59          | 209.14         | 105.07           | 2  |
| 11 |        |                 |                |                  | K    | 155.13 | 78.07           | 138.10         | 69.55            | 1  |

Gene Symbol Sequences m/z Charge Ion score Expect  
 RALYL VFIGNLNTAIVK 644.888 2+ 48 0.0005  
 (IPI00166137 Isoform 1 of RNA-binding Raly-like protein)

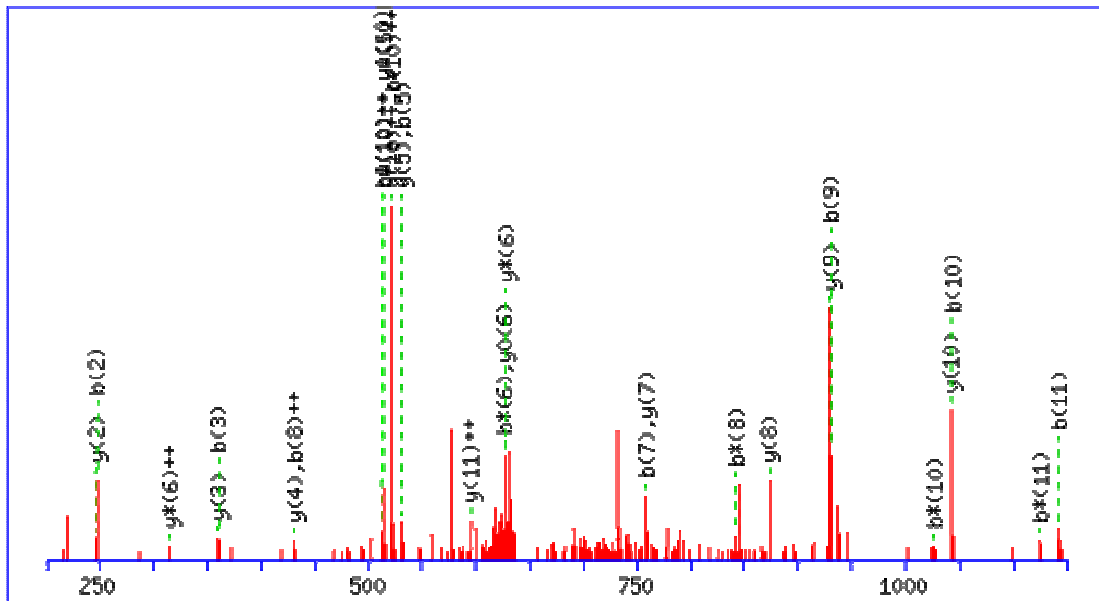

| #  | b       | b <sup>++</sup> | b <sup>*</sup> | b <sup>*++</sup> | b <sup>0</sup> | b <sup>0++</sup> | Seq. | y       | y <sup>++</sup> | y <sup>*</sup> | y <sup>*++</sup> | y <sup>0</sup> | y <sup>0++</sup> | #  |
|----|---------|-----------------|----------------|------------------|----------------|------------------|------|---------|-----------------|----------------|------------------|----------------|------------------|----|
| 1  | 100.08  | 50.54           |                |                  |                |                  | V    |         |                 |                |                  |                |                  | 12 |
| 2  | 247.14  | 124.08          |                |                  |                |                  | F    | 1189.69 | 595.35          | 1172.67        | 586.84           | 1171.68        | 586.35           | 11 |
| 3  | 360.23  | 180.62          |                |                  |                |                  | I    | 1042.63 | 521.82          | 1025.60        | 513.30           | 1024.61        | 512.81           | 10 |
| 4  | 417.25  | 209.13          |                |                  |                |                  | G    | 929.54  | 465.27          | 912.51         | 456.76           | 911.53         | 456.27           | 9  |
| 5  | 531.29  | 266.15          | 514.27         | 257.64           |                |                  | N    | 872.52  | 436.76          | 855.49         | 428.25           | 854.51         | 427.76           | 8  |
| 6  | 644.38  | 322.69          | 627.35         | 314.18           |                |                  | L    | 758.48  | 379.74          | 741.45         | 371.23           | 740.47         | 370.74           | 7  |
| 7  | 758.42  | 379.71          | 741.39         | 371.20           |                |                  | N    | 645.39  | 323.20          | 628.37         | 314.69           | 627.38         | 314.19           | 6  |
| 8  | 859.47  | 430.24          | 842.44         | 421.72           | 841.46         | 421.23           | T    | 531.35  | 266.18          | 514.32         | 257.67           | 513.34         | 257.17           | 5  |
| 9  | 930.50  | 465.76          | 913.48         | 457.24           | 912.49         | 456.75           | A    | 430.30  | 215.65          | 413.28         | 207.14           |                |                  | 4  |
| 10 | 1043.59 | 522.30          | 1026.56        | 513.78           | 1025.58        | 513.29           | I    | 359.27  | 180.14          | 342.24         | 171.62           |                |                  | 3  |
| 11 | 1142.66 | 571.83          | 1125.63        | 563.32           | 1124.65        | 562.83           | V    | 246.18  | 123.59          | 229.15         | 115.08           |                |                  | 2  |
| 12 |         |                 |                |                  |                |                  | K    | 147.11  | 74.06           | 130.09         | 65.55            |                |                  | 1  |

Gene Symbol Sequences m/z Charge Ion score Expect  
RPL34 LSYNTASNKTR 631.835 2+ 54 0.00066  
(IPI00219160 60S ribosomal protein L34)

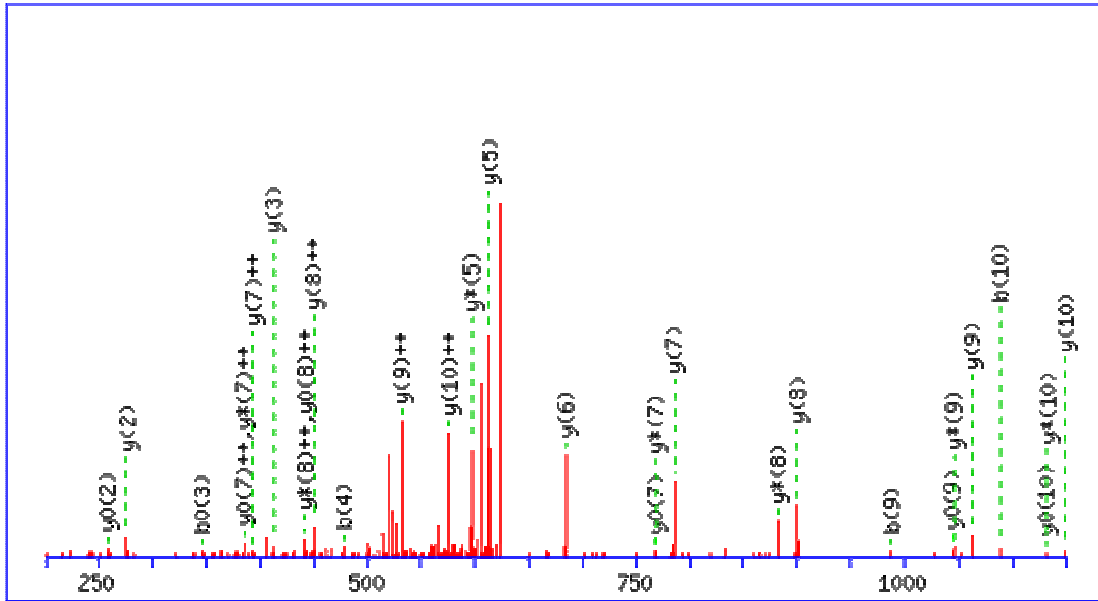

K9: Lysine (K-full)

| #  | b       | b <sup>++</sup> | b <sup>*</sup> | b <sup>+++</sup> | b <sup>0</sup> | b <sup>0++</sup> | Seq. | y       | y <sup>++</sup> | y <sup>*</sup> | y <sup>+++</sup> | y <sup>0</sup> | y <sup>0++</sup> | #  |
|----|---------|-----------------|----------------|------------------|----------------|------------------|------|---------|-----------------|----------------|------------------|----------------|------------------|----|
| 1  | 114.09  | 57.55           |                |                  |                |                  | L    |         |                 |                |                  |                |                  | 11 |
| 2  | 201.12  | 101.07          |                |                  | 183.11         | 92.06            | S    | 1149.57 | 575.29          | 1132.55        | 566.78           | 1131.56        | 566.29           | 10 |
| 3  | 364.19  | 182.60          |                |                  | 346.18         | 173.59           | Y    | 1062.54 | 531.77          | 1045.52        | 523.26           | 1044.53        | 522.77           | 9  |
| 4  | 478.23  | 239.62          | 461.20         | 231.11           | 460.22         | 230.61           | N    | 899.48  | 450.24          | 882.45         | 441.73           | 881.47         | 441.24           | 8  |
| 5  | 579.28  | 290.14          | 562.25         | 281.63           | 561.27         | 281.14           | T    | 785.44  | 393.22          | 768.41         | 384.71           | 767.42         | 384.22           | 7  |
| 6  | 650.31  | 325.66          | 633.29         | 317.15           | 632.30         | 316.66           | A    | 684.39  | 342.70          | 667.36         | 334.18           | 666.38         | 333.69           | 6  |
| 7  | 737.35  | 369.18          | 720.32         | 360.66           | 719.34         | 360.17           | S    | 613.35  | 307.18          | 596.32         | 298.67           | 595.34         | 298.17           | 5  |
| 8  | 851.39  | 426.20          | 834.36         | 417.69           | 833.38         | 417.19           | N    | 526.32  | 263.66          | 509.29         | 255.15           | 508.31         | 254.66           | 4  |
| 9  | 987.50  | 494.25          | 970.47         | 485.74           | 969.49         | 485.25           | K    | 412.28  | 206.64          | 395.25         | 198.13           | 394.27         | 197.64           | 3  |
| 10 | 1088.55 | 544.78          | 1071.52        | 536.26           | 1070.54        | 535.77           | T    | 276.17  | 138.59          | 259.14         | 130.07           | 258.16         | 129.58           | 2  |
| 11 |         |                 |                |                  |                |                  | R    | 175.12  | 88.06           | 158.09         | 79.55            |                |                  | 1  |

Gene Symbol Sequences m/z Charge Ion score Expect  
RPL36AL GKDSL~~Y~~AQGR 547.784 2+ 58 0.00019  
(IPI00056494 60S ribosomal protein L36a-like)

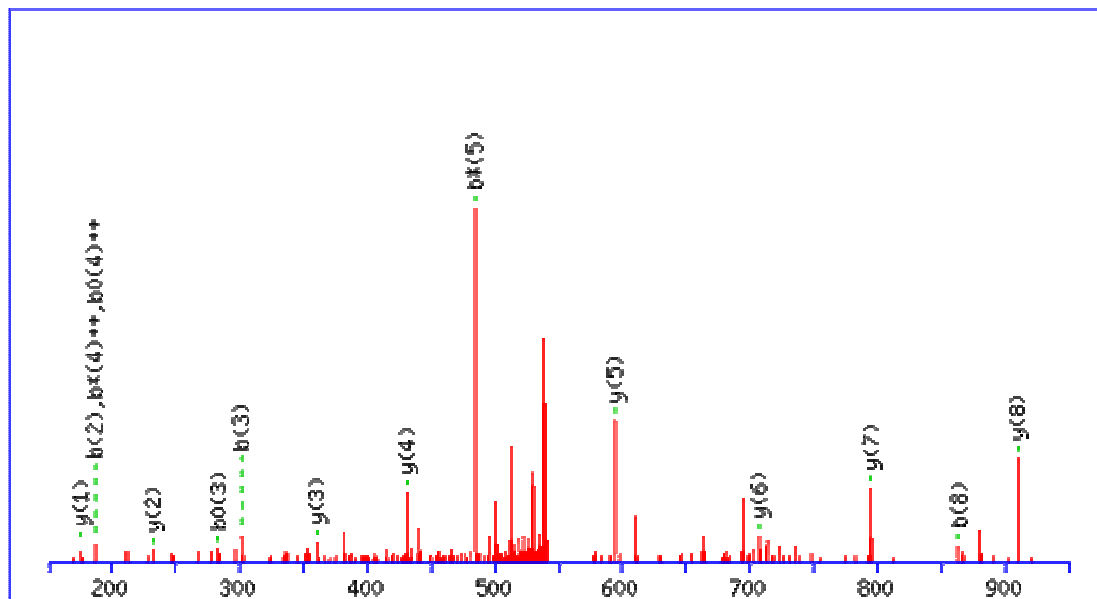

| #  | b      | b <sup>++</sup> | b <sup>*</sup> | b <sup>+++</sup> | b <sup>0</sup> | b <sup>0++</sup> | Seq. | y       | y <sup>++</sup> | y <sup>*</sup> | y <sup>+++</sup> | y <sup>0</sup> | y <sup>0++</sup> | #  |
|----|--------|-----------------|----------------|------------------|----------------|------------------|------|---------|-----------------|----------------|------------------|----------------|------------------|----|
| 1  | 58.03  | 29.52           |                |                  |                |                  | G    |         |                 |                |                  |                |                  | 10 |
| 2  | 186.12 | 93.57           | 169.10         | 85.05            |                |                  | K    | 1037.54 | 519.27          | 1020.51        | 510.76           | 1019.53        | 510.27           | 9  |
| 3  | 301.15 | 151.08          | 284.12         | 142.57           | 283.14         | 142.07           | D    | 909.44  | 455.22          | 892.42         | 446.71           | 891.43         | 446.22           | 8  |
| 4  | 388.18 | 194.59          | 371.16         | 186.08           | 370.17         | 185.59           | S    | 794.42  | 397.71          | 777.39         | 389.20           | 776.40         | 388.71           | 7  |
| 5  | 501.27 | 251.14          | 484.24         | 242.62           | 483.26         | 242.13           | L    | 707.38  | 354.20          | 690.36         | 345.68           |                |                  | 6  |
| 6  | 664.33 | 332.67          | 647.30         | 324.16           | 646.32         | 323.66           | Y    | 594.30  | 297.65          | 577.27         | 289.14           |                |                  | 5  |
| 7  | 735.37 | 368.19          | 718.34         | 359.67           | 717.36         | 359.18           | A    | 431.24  | 216.12          | 414.21         | 207.61           |                |                  | 4  |
| 8  | 863.43 | 432.22          | 846.40         | 423.70           | 845.42         | 423.21           | Q    | 360.20  | 180.60          | 343.17         | 172.09           |                |                  | 3  |
| 9  | 920.45 | 460.73          | 903.42         | 452.21           | 902.44         | 451.72           | G    | 232.14  | 116.57          | 215.11         | 108.06           |                |                  | 2  |
| 10 |        |                 |                |                  |                |                  | R    | 175.12  | 88.06           | 158.09         | 79.55            |                |                  | 1  |

Gene Symbol Sequences m/z Charge Ion score Expect  
 S100A16 AADKLIQNLDANHDGR 586.972 3+ 54 0.00054  
 (IPI00062120 Protein S100-A16)

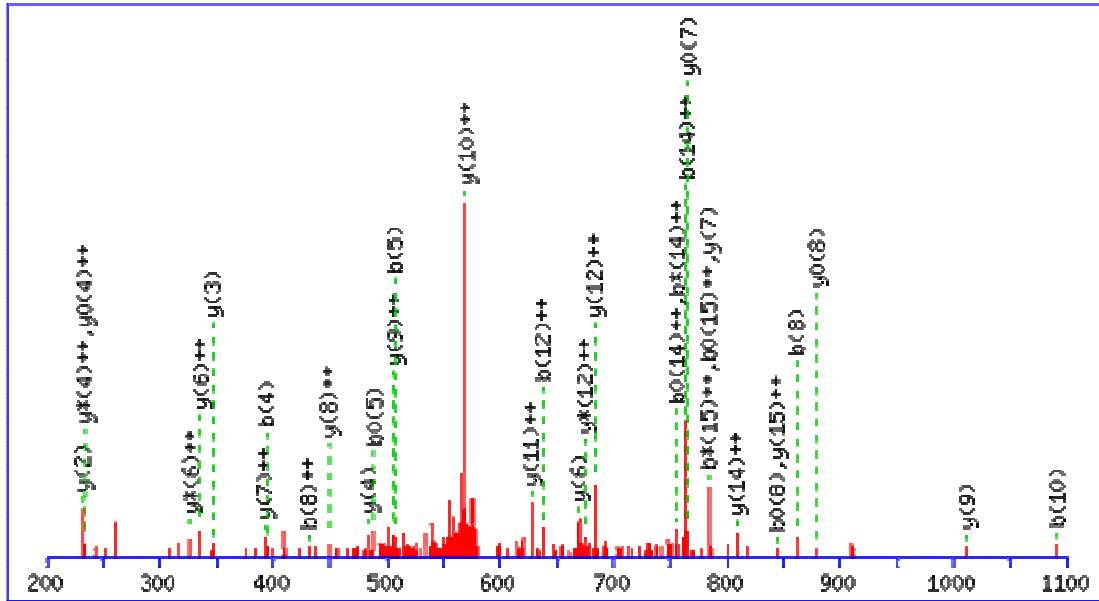

K4: Lysine (K-full)

| #  | b       | b <sup>++</sup> | b <sup>+</sup> | b <sup>+++</sup> | b <sup>0</sup> | b <sup>0++</sup> | Seq. | y       | y <sup>++</sup> | y <sup>+</sup> | y <sup>+++</sup> | y <sup>0</sup> | y <sup>0++</sup> | #  |
|----|---------|-----------------|----------------|------------------|----------------|------------------|------|---------|-----------------|----------------|------------------|----------------|------------------|----|
| 1  | 72.04   | 36.53           |                |                  |                |                  | A    |         |                 |                |                  |                |                  | 16 |
| 2  | 143.08  | 72.04           |                |                  |                |                  | A    | 1687.86 | 844.43          | 1670.83        | 835.92           | 1669.85        | 835.43           | 15 |
| 3  | 258.11  | 129.56          |                |                  | 240.10         | 120.55           | D    | 1616.82 | 808.92          | 1599.80        | 800.40           | 1598.81        | 799.91           | 14 |
| 4  | 394.22  | 197.61          | 377.19         | 189.10           | 376.21         | 188.61           | K    | 1501.80 | 751.40          | 1484.77        | 742.89           | 1483.79        | 742.40           | 13 |
| 5  | 507.30  | 254.15          | 490.28         | 245.64           | 489.29         | 245.15           | L    | 1365.69 | 683.35          | 1348.66        | 674.83           | 1347.68        | 674.34           | 12 |
| 6  | 620.39  | 310.70          | 603.36         | 302.18           | 602.38         | 301.69           | I    | 1252.60 | 626.81          | 1235.58        | 618.29           | 1234.59        | 617.80           | 11 |
| 7  | 748.44  | 374.73          | 731.42         | 366.21           | 730.43         | 365.72           | Q    | 1139.52 | 570.26          | 1122.49        | 561.75           | 1121.51        | 561.26           | 10 |
| 8  | 862.49  | 431.75          | 845.46         | 423.23           | 844.48         | 422.74           | N    | 1011.46 | 506.23          | 994.43         | 497.72           | 993.45         | 497.23           | 9  |
| 9  | 975.57  | 488.29          | 958.54         | 479.78           | 957.56         | 479.28           | L    | 897.42  | 449.21          | 880.39         | 440.70           | 879.41         | 440.21           | 8  |
| 10 | 1090.60 | 545.80          | 1073.57        | 537.29           | 1072.59        | 536.80           | D    | 784.33  | 392.67          | 767.31         | 384.16           | 766.32         | 383.66           | 7  |
| 11 | 1161.64 | 581.32          | 1144.61        | 572.81           | 1143.62        | 572.32           | A    | 669.31  | 335.16          | 652.28         | 326.64           | 651.30         | 326.15           | 6  |
| 12 | 1275.68 | 638.34          | 1258.65        | 629.83           | 1257.67        | 629.34           | N    | 598.27  | 299.64          | 581.24         | 291.12           | 580.26         | 290.63           | 5  |
| 13 | 1412.74 | 706.87          | 1395.71        | 698.36           | 1394.73        | 697.87           | H    | 484.23  | 242.62          | 467.20         | 234.10           | 466.22         | 233.61           | 4  |
| 14 | 1527.76 | 764.39          | 1510.74        | 755.87           | 1509.75        | 755.38           | D    | 347.17  | 174.09          | 330.14         | 165.57           | 329.16         | 165.08           | 3  |
| 15 | 1584.79 | 792.90          | 1567.76        | 784.38           | 1566.78        | 783.89           | G    | 232.14  | 116.57          | 215.11         | 108.06           |                |                  | 2  |
| 16 |         |                 |                |                  |                |                  | R    | 175.12  | 88.06           | 158.09         | 79.55            |                |                  | 1  |



Gene Symbol Sequences m/z Charge Ion score Expect  
 SF3B5 MLQPCGPPADKPEEN 845.884 2+ 46 0.0019  
 (IPI00010404 Splicing factor 3B subunit 5)

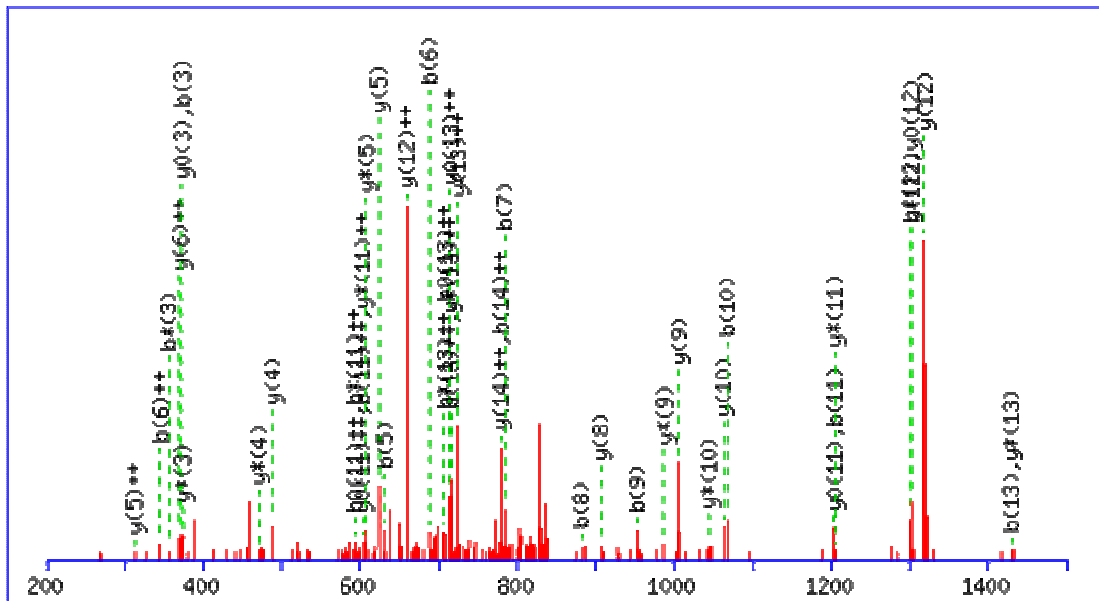

C5: Carbamidomethylated  
 K11: Lysine (K-full)

| #  | b       | b <sup>++</sup> | b <sup>*</sup> | b <sup>*++</sup> | b <sup>0</sup> | b <sup>0++</sup> | Seq. | y       | y <sup>++</sup> | y <sup>*</sup> | y <sup>*++</sup> | y <sup>0</sup> | y <sup>0++</sup> | #  |
|----|---------|-----------------|----------------|------------------|----------------|------------------|------|---------|-----------------|----------------|------------------|----------------|------------------|----|
| 1  | 132.05  | 66.53           |                |                  |                |                  | M    |         |                 |                |                  |                |                  | 15 |
| 2  | 245.13  | 123.07          |                |                  |                |                  | L    | 1559.72 | 780.37          | 1542.70        | 771.85           | 1541.71        | 771.36           | 14 |
| 3  | 373.19  | 187.10          | 356.16         | 178.59           |                |                  | Q    | 1446.64 | 723.82          | 1429.61        | 715.31           | 1428.63        | 714.82           | 13 |
| 4  | 470.24  | 235.63          | 453.22         | 227.11           |                |                  | P    | 1318.58 | 659.79          | 1301.56        | 651.28           | 1300.57        | 650.79           | 12 |
| 5  | 630.27  | 315.64          | 613.25         | 307.13           |                |                  | C    | 1221.53 | 611.27          | 1204.50        | 602.76           | 1203.52        | 602.26           | 11 |
| 6  | 687.30  | 344.15          | 670.27         | 335.64           |                |                  | G    | 1061.50 | 531.25          | 1044.47        | 522.74           | 1043.49        | 522.25           | 10 |
| 7  | 784.35  | 392.68          | 767.32         | 384.16           |                |                  | P    | 1004.48 | 502.74          | 987.45         | 494.23           | 986.47         | 493.74           | 9  |
| 8  | 881.40  | 441.20          | 864.37         | 432.69           |                |                  | P    | 907.42  | 454.22          | 890.40         | 445.70           | 889.41         | 445.21           | 8  |
| 9  | 952.44  | 476.72          | 935.41         | 468.21           |                |                  | A    | 810.37  | 405.69          | 793.35         | 397.18           | 792.36         | 396.68           | 7  |
| 10 | 1067.46 | 534.24          | 1050.44        | 525.72           | 1049.45        | 525.23           | D    | 739.33  | 370.17          | 722.31         | 361.66           | 721.32         | 361.17           | 6  |
| 11 | 1203.57 | 602.29          | 1186.55        | 593.78           | 1185.56        | 593.29           | K    | 624.31  | 312.66          | 607.28         | 304.14           | 606.30         | 303.65           | 5  |
| 12 | 1300.63 | 650.82          | 1283.60        | 642.30           | 1282.62        | 641.81           | P    | 488.20  | 244.60          | 471.17         | 236.09           | 470.19         | 235.60           | 4  |
| 13 | 1429.67 | 715.34          | 1412.64        | 706.83           | 1411.66        | 706.33           | E    | 391.15  | 196.08          | 374.12         | 187.56           | 373.14         | 187.07           | 3  |
| 14 | 1558.71 | 779.86          | 1541.69        | 771.35           | 1540.70        | 770.85           | E    | 262.10  | 131.56          | 245.08         | 123.04           | 244.09         | 122.55           | 2  |
| 15 |         |                 |                |                  |                |                  | N    | 133.06  | 67.03           | 116.03         | 58.52            |                |                  | 1  |

Gene Symbol Sequences m/z Charge Ion score Expect  
 SLTM AAATGAVAASAASGQAEK 879.957 2+ 80 1.5e-06  
 (IPI00019996 modulator of estrogen induced transcription isoform b)

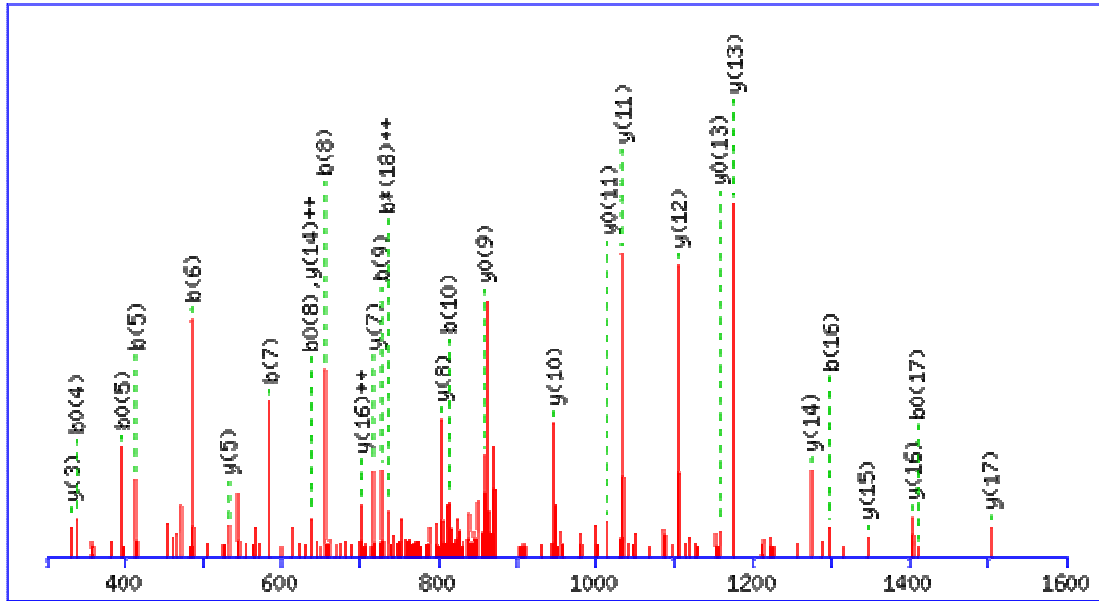

N-term : N-Acetyl (Protein)

| #  | b       | b <sup>++</sup> | b <sup>*</sup> | b <sup>+++</sup> | b <sup>0</sup> | b <sup>0++</sup> | Seq. | y       | y <sup>++</sup> | y <sup>*</sup> | y <sup>+++</sup> | y <sup>0</sup> | y <sup>0++</sup> | #  |
|----|---------|-----------------|----------------|------------------|----------------|------------------|------|---------|-----------------|----------------|------------------|----------------|------------------|----|
| 1  | 114.05  | 57.53           |                |                  |                |                  | A    |         |                 |                |                  |                |                  | 20 |
| 2  | 185.09  | 93.05           |                |                  |                |                  | A    | 1645.85 | 823.43          | 1628.82        | 814.92           | 1627.84        | 814.42           | 19 |
| 3  | 256.13  | 128.57          |                |                  |                |                  | A    | 1574.81 | 787.91          | 1557.79        | 779.40           | 1556.80        | 778.90           | 18 |
| 4  | 357.18  | 179.09          |                |                  | 339.17         | 170.09           | T    | 1503.78 | 752.39          | 1486.75        | 743.88           | 1485.77        | 743.39           | 17 |
| 5  | 414.20  | 207.60          |                |                  | 396.19         | 198.60           | G    | 1402.73 | 701.87          | 1385.70        | 693.35           | 1384.72        | 692.86           | 16 |
| 6  | 485.24  | 243.12          |                |                  | 467.22         | 234.12           | A    | 1345.71 | 673.36          | 1328.68        | 664.84           | 1327.70        | 664.35           | 15 |
| 7  | 584.30  | 292.66          |                |                  | 566.29         | 283.65           | V    | 1274.67 | 637.84          | 1257.64        | 629.33           | 1256.66        | 628.83           | 14 |
| 8  | 655.34  | 328.17          |                |                  | 637.33         | 319.17           | A    | 1175.60 | 588.30          | 1158.57        | 579.79           | 1157.59        | 579.30           | 13 |
| 9  | 726.38  | 363.69          |                |                  | 708.37         | 354.69           | A    | 1104.56 | 552.79          | 1087.54        | 544.27           | 1086.55        | 543.78           | 12 |
| 10 | 813.41  | 407.21          |                |                  | 795.40         | 398.20           | S    | 1033.53 | 517.27          | 1016.50        | 508.75           | 1015.52        | 508.26           | 11 |
| 11 | 884.45  | 442.73          |                |                  | 866.44         | 433.72           | A    | 946.50  | 473.75          | 929.47         | 465.24           | 928.48         | 464.75           | 10 |
| 12 | 955.48  | 478.25          |                |                  | 937.47         | 469.24           | A    | 875.46  | 438.23          | 858.43         | 429.72           | 857.45         | 429.23           | 9  |
| 13 | 1042.52 | 521.76          |                |                  | 1024.51        | 512.76           | S    | 804.42  | 402.71          | 787.39         | 394.20           | 786.41         | 393.71           | 8  |
| 14 | 1099.54 | 550.27          |                |                  | 1081.53        | 541.27           | G    | 717.39  | 359.20          | 700.36         | 350.68           | 699.38         | 350.19           | 7  |
| 15 | 1227.60 | 614.30          | 1210.57        | 605.79           | 1209.59        | 605.30           | Q    | 660.37  | 330.69          | 643.34         | 322.17           | 642.36         | 321.68           | 6  |
| 16 | 1298.63 | 649.82          | 1281.61        | 641.31           | 1280.62        | 640.82           | A    | 532.31  | 266.66          | 515.28         | 258.14           | 514.30         | 257.65           | 5  |
| 17 | 1427.68 | 714.34          | 1410.65        | 705.83           | 1409.67        | 705.34           | E    | 461.27  | 231.14          | 444.25         | 222.63           | 443.26         | 222.13           | 4  |
| 18 | 1484.70 | 742.85          | 1467.67        | 734.34           | 1466.69        | 733.85           | G    | 332.23  | 166.62          | 315.20         | 158.10           |                |                  | 3  |
| 19 | 1612.79 | 806.90          | 1595.77        | 798.39           | 1594.78        | 797.89           | K    | 275.21  | 138.11          | 258.18         | 129.59           |                |                  | 2  |
| 20 |         |                 |                |                  |                |                  | K    | 147.11  | 74.06           | 130.09         | 65.55            |                |                  | 1  |

Gene Symbol Sequences m/z Charge Ion score Expect  
 SNRPC PKFYCDYCDTYLTHDSPSVR 842.034 3+ 48 0.00088  
 (IPI00013396 U1 small nuclear ribonucleoprotein C)

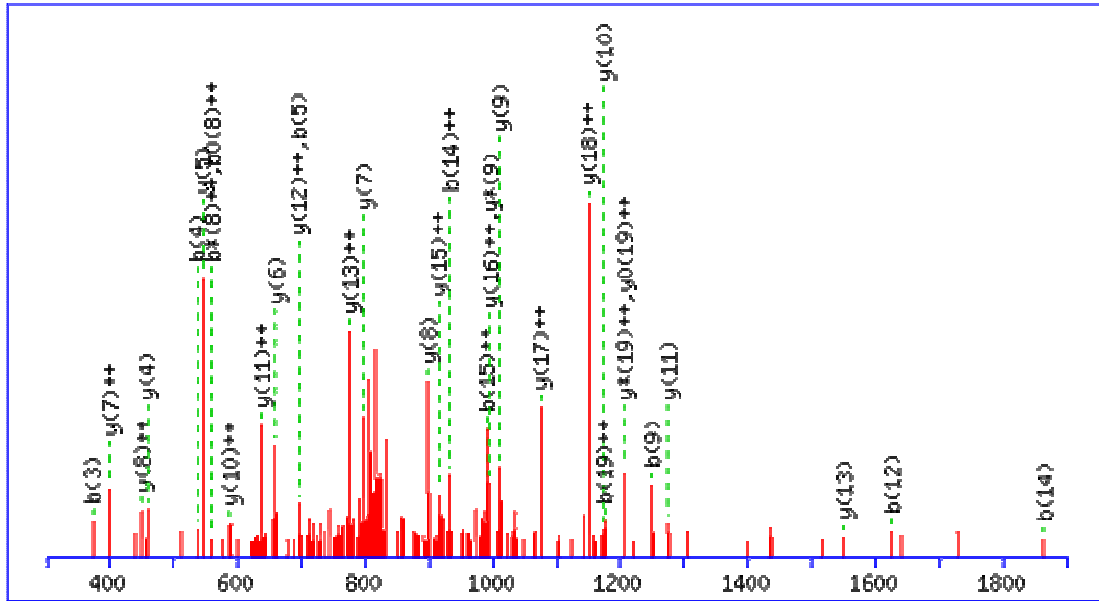

C5, C8: Carbamidomethylated

| #  | b       | b <sup>++</sup> | b <sup>*</sup> | b <sup>+++</sup> | b <sup>0</sup> | b <sup>0++</sup> | Seq. | y       | y <sup>++</sup> | y <sup>*</sup> | y <sup>+++</sup> | y <sup>0</sup> | y <sup>0++</sup> | #  |
|----|---------|-----------------|----------------|------------------|----------------|------------------|------|---------|-----------------|----------------|------------------|----------------|------------------|----|
| 1  | 98.06   | 49.53           |                |                  |                |                  | P    |         |                 |                |                  |                |                  | 20 |
| 2  | 226.15  | 113.58          | 209.13         | 105.07           |                |                  | K    | 2427.04 | 1214.02         | 2410.01        | 1205.51          | 2409.03        | 1205.02          | 19 |
| 3  | 373.22  | 187.12          | 356.20         | 178.60           |                |                  | F    | 2298.94 | 1149.98         | 2281.92        | 1141.46          | 2280.93        | 1140.97          | 18 |
| 4  | 536.29  | 268.65          | 519.26         | 260.13           |                |                  | Y    | 2151.87 | 1076.44         | 2134.85        | 1067.93          | 2133.86        | 1067.44          | 17 |
| 5  | 696.32  | 348.66          | 679.29         | 340.15           |                |                  | C    | 1988.81 | 994.91          | 1971.78        | 986.40           | 1970.80        | 985.90           | 16 |
| 6  | 811.34  | 406.18          | 794.32         | 397.66           | 793.33         | 397.17           | D    | 1828.78 | 914.89          | 1811.75        | 906.38           | 1810.77        | 905.89           | 15 |
| 7  | 974.41  | 487.71          | 957.38         | 479.19           | 956.40         | 478.70           | Y    | 1713.75 | 857.38          | 1696.73        | 848.87           | 1695.74        | 848.38           | 14 |
| 8  | 1134.44 | 567.72          | 1117.41        | 559.21           | 1116.43        | 558.72           | C    | 1550.69 | 775.85          | 1533.66        | 767.34           | 1532.68        | 766.84           | 13 |
| 9  | 1249.47 | 625.24          | 1232.44        | 616.72           | 1231.45        | 616.23           | D    | 1390.66 | 695.83          | 1373.63        | 687.32           | 1372.65        | 686.83           | 12 |
| 10 | 1350.51 | 675.76          | 1333.49        | 667.25           | 1332.50        | 666.75           | T    | 1275.63 | 638.32          | 1258.61        | 629.81           | 1257.62        | 629.31           | 11 |
| 11 | 1513.58 | 757.29          | 1496.55        | 748.78           | 1495.57        | 748.29           | Y    | 1174.59 | 587.80          | 1157.56        | 579.28           | 1156.57        | 578.79           | 10 |
| 12 | 1626.66 | 813.83          | 1609.63        | 805.32           | 1608.65        | 804.83           | L    | 1011.52 | 506.26          | 994.50         | 497.75           | 993.51         | 497.26           | 9  |
| 13 | 1727.71 | 864.36          | 1710.68        | 855.84           | 1709.70        | 855.35           | T    | 898.44  | 449.72          | 881.41         | 441.21           | 880.43         | 440.72           | 8  |
| 14 | 1864.77 | 932.89          | 1847.74        | 924.37           | 1846.76        | 923.88           | H    | 797.39  | 399.20          | 780.36         | 390.69           | 779.38         | 390.19           | 7  |
| 15 | 1979.79 | 990.40          | 1962.77        | 981.89           | 1961.78        | 981.40           | D    | 660.33  | 330.67          | 643.30         | 322.16           | 642.32         | 321.66           | 6  |
| 16 | 2066.83 | 1033.92         | 2049.80        | 1025.40          | 2048.82        | 1024.91          | S    | 545.30  | 273.16          | 528.28         | 264.64           | 527.29         | 264.15           | 5  |
| 17 | 2163.88 | 1082.44         | 2146.85        | 1073.93          | 2145.87        | 1073.44          | P    | 458.27  | 229.64          | 441.25         | 221.13           | 440.26         | 220.63           | 4  |
| 18 | 2250.91 | 1125.96         | 2233.88        | 1117.45          | 2232.90        | 1116.95          | S    | 361.22  | 181.11          | 344.19         | 172.60           | 343.21         | 172.11           | 3  |
| 19 | 2349.98 | 1175.49         | 2332.95        | 1166.98          | 2331.97        | 1166.49          | V    | 274.19  | 137.60          | 257.16         | 129.08           |                |                  | 2  |
| 20 |         |                 |                |                  |                |                  | R    | 175.12  | 88.06           | 158.09         | 79.55            |                |                  | 1  |

**Gene Symbol**      **Sequences**      **m/z**      **Charge**      **Ion score**      **Expect**  
 TIMM8A      SKPVFSESLSD      598.299      2+      51      0.001  
 (IPI00028376 Mitochondrial import inner membrane translocase subunit Tim8 A)

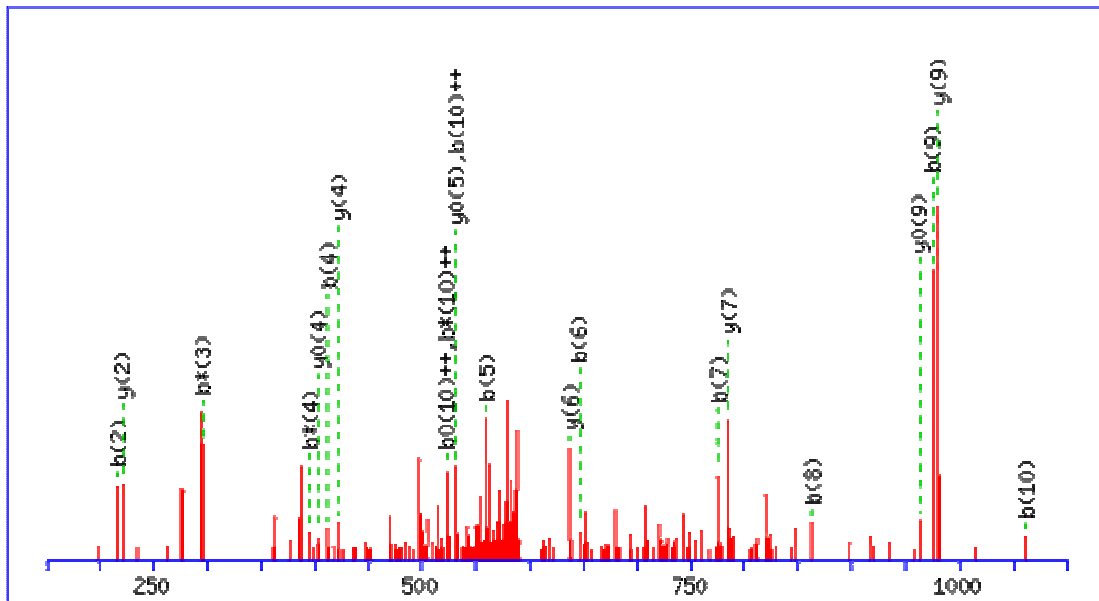

| #  | b              | b <sup>++</sup> | b <sup>*</sup> | b <sup>+++</sup> | b <sup>0</sup> | b <sup>0++</sup> | Seq. | y             | y <sup>++</sup> | y <sup>*</sup> | y <sup>+++</sup> | y <sup>0</sup> | y <sup>0++</sup> | #  |
|----|----------------|-----------------|----------------|------------------|----------------|------------------|------|---------------|-----------------|----------------|------------------|----------------|------------------|----|
| 1  | 88.04          | 44.52           |                |                  | 70.03          | 35.52            | S    |               |                 |                |                  |                |                  | 11 |
| 2  | <b>216.13</b>  | 108.57          | 199.11         | 100.06           | 198.12         | 99.57            | K    | 1108.55       | 554.78          | 1091.53        | 546.27           | 1090.54        | 545.77           | 10 |
| 3  | 313.19         | 157.10          | <b>296.16</b>  | 148.58           | 295.18         | 148.09           | P    | <b>980.46</b> | 490.73          |                |                  | <b>962.45</b>  | 481.73           | 9  |
| 4  | <b>412.26</b>  | 206.63          | <b>395.23</b>  | 198.12           | 394.24         | 197.63           | V    | 883.40        | 442.21          |                |                  | 865.39         | 433.20           | 8  |
| 5  | <b>559.32</b>  | 280.17          | 542.30         | 271.65           | 541.31         | 271.16           | F    | <b>784.34</b> | 392.67          |                |                  | 766.33         | 383.67           | 7  |
| 6  | <b>646.36</b>  | 323.68          | 629.33         | 315.17           | 628.35         | 314.68           | S    | <b>637.27</b> | 319.14          |                |                  | 619.26         | 310.13           | 6  |
| 7  | <b>775.40</b>  | 388.20          | 758.37         | 379.69           | 757.39         | 379.20           | E    | 550.24        | 275.62          |                |                  | <b>532.22</b>  | 266.62           | 5  |
| 8  | <b>862.43</b>  | 431.72          | 845.40         | 423.21           | 844.42         | 422.71           | S    | <b>421.19</b> | 211.10          |                |                  | <b>403.18</b>  | 202.09           | 4  |
| 9  | <b>975.51</b>  | 488.26          | 958.49         | 479.75           | 957.50         | 479.26           | L    | 334.16        | 167.58          |                |                  | 316.15         | 158.58           | 3  |
| 10 | <b>1062.55</b> | <b>531.78</b>   | 1045.52        | <b>523.26</b>    | 1044.54        | <b>522.77</b>    | S    | <b>221.08</b> | 111.04          |                |                  | 203.07         | 102.04           | 2  |
| 11 |                |                 |                |                  |                |                  | D    | 134.04        | 67.53           |                |                  | 116.03         | 58.52            | 1  |

**Gene Symbol**                      **Sequences**                      **m/z**      **Charge**      **Ion score**      **Expect**  
 TXNRD2      WLGGGTCVNVGCIPK      809.407      2+      94      6.2e-08  
 (IPI00157820 Thioredoxin reductase 2, mitochondrial precursor (EC 1.8.1.9) (TR3))

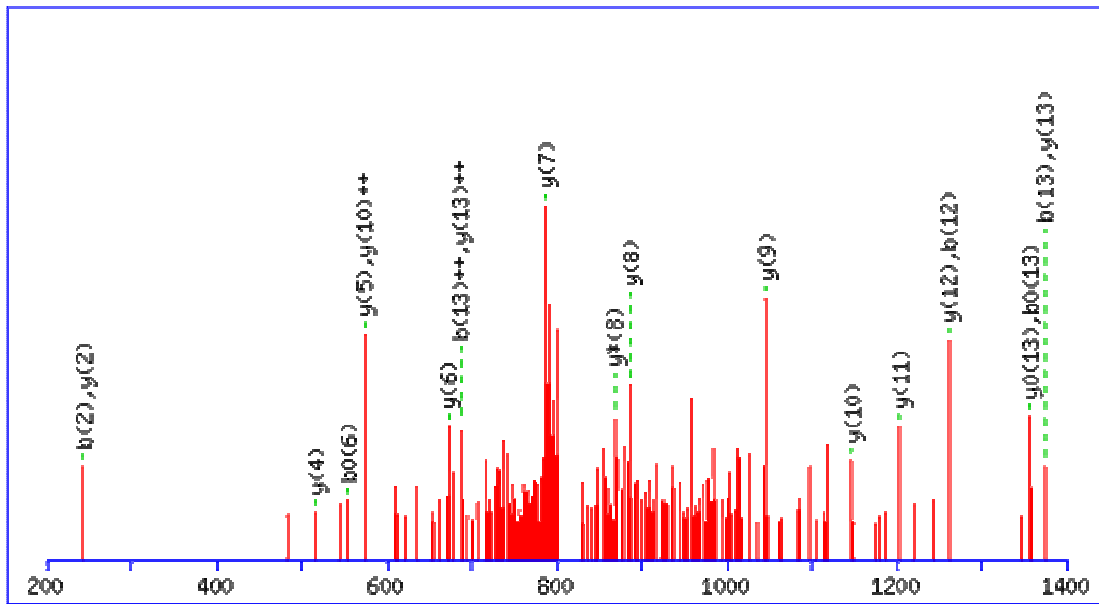

C7, C12: Carbamidomethylated

| #  | b              | b <sup>++</sup> | b <sup>+</sup> | b <sup>+++</sup> | b <sup>0</sup> | b <sup>0++</sup> | Seq. | y              | y <sup>++</sup> | y <sup>+</sup> | y <sup>+++</sup> | y <sup>0</sup> | y <sup>0++</sup> | #  |
|----|----------------|-----------------|----------------|------------------|----------------|------------------|------|----------------|-----------------|----------------|------------------|----------------|------------------|----|
| 1  | 187.09         | 94.05           |                |                  |                |                  | W    |                |                 |                |                  |                |                  | 15 |
| 2  | <b>244.11</b>  | 122.56          |                |                  |                |                  | G    | 1431.71        | 716.36          | 1414.68        | 707.84           | 1413.70        | 707.35           | 14 |
| 3  | 357.19         | 179.10          |                |                  |                |                  | L    | <b>1374.69</b> | <b>687.85</b>   | 1357.66        | 679.33           | <b>1356.68</b> | 678.84           | 13 |
| 4  | 414.21         | 207.61          |                |                  |                |                  | G    | <b>1261.60</b> | 631.31          | 1244.58        | 622.79           | 1243.59        | 622.30           | 12 |
| 5  | 471.24         | 236.12          |                |                  |                |                  | G    | <b>1204.58</b> | 602.79          | 1187.55        | 594.28           | 1186.57        | 593.79           | 11 |
| 6  | 572.28         | 286.64          |                |                  | <b>554.27</b>  | 277.64           | T    | <b>1147.56</b> | <b>574.28</b>   | 1130.53        | 565.77           | 1129.55        | 565.28           | 10 |
| 7  | 732.31         | 366.66          |                |                  | 714.30         | 357.66           | C    | <b>1046.51</b> | 523.76          | 1029.49        | 515.25           |                |                  | 9  |
| 8  | 831.38         | 416.19          |                |                  | 813.37         | 407.19           | V    | <b>886.48</b>  | 443.74          | <b>869.45</b>  | 435.23           |                |                  | 8  |
| 9  | 945.42         | 473.22          | 928.40         | 464.70           | 927.41         | 464.21           | N    | <b>787.41</b>  | 394.21          | 770.39         | 385.70           |                |                  | 7  |
| 10 | 1044.49        | 522.75          | 1027.47        | 514.24           | 1026.48        | 513.74           | V    | <b>673.37</b>  | 337.19          | 656.34         | 328.68           |                |                  | 6  |
| 11 | 1101.51        | 551.26          | 1084.49        | 542.75           | 1083.50        | 542.26           | G    | <b>574.30</b>  | 287.65          | 557.28         | 279.14           |                |                  | 5  |
| 12 | <b>1261.55</b> | 631.28          | 1244.52        | 622.76           | 1243.53        | 622.27           | C    | <b>517.28</b>  | 259.14          | 500.25         | 250.63           |                |                  | 4  |
| 13 | <b>1374.63</b> | <b>687.82</b>   | 1357.60        | 679.31           | <b>1356.62</b> | 678.81           | I    | 357.25         | 179.13          | 340.22         | 170.62           |                |                  | 3  |
| 14 | 1471.68        | 736.34          | 1454.66        | 727.83           | 1453.67        | 727.34           | P    | <b>244.17</b>  | 122.59          | 227.14         | 114.07           |                |                  | 2  |
| 15 |                |                 |                |                  |                |                  | K    | 147.11         | 74.06           | 130.09         | 65.55            |                |                  | 1  |

**Gene Symbol**      **Sequences**      **m/z**      **Charge**      **Ion score**      **Expect**  
 UBXD7      AAHGSAASSALK      585.299      2+      45      0.0042  
 (IPI00642423 Isoform 2 of UBX domain-containing protein 7)

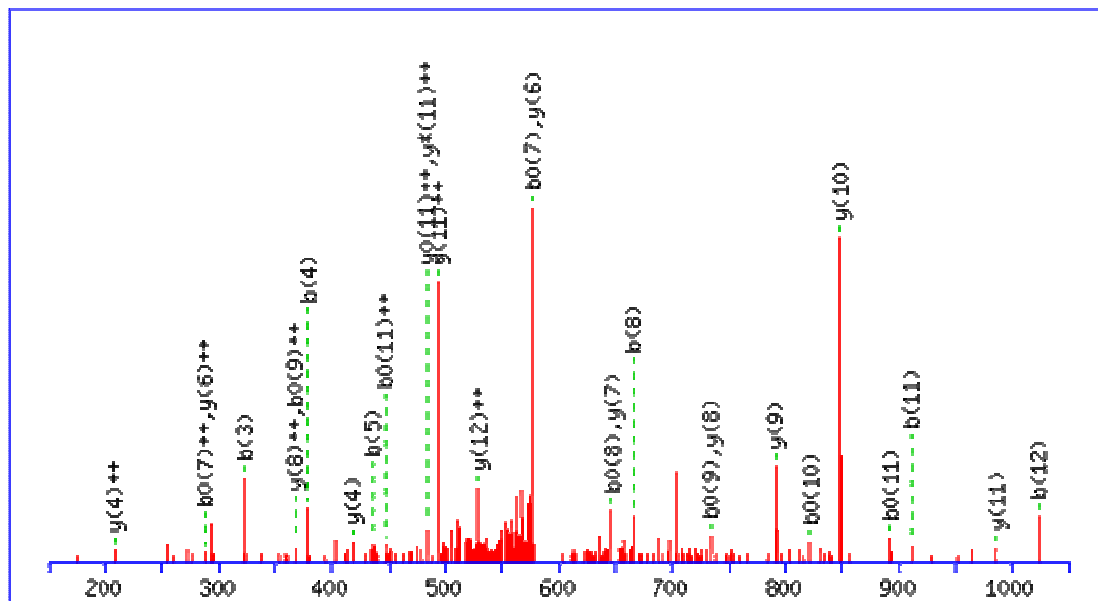

N-term : N-Acetyl (Protein)

| #  | b       | b <sup>++</sup> | b <sup>0</sup> | b <sup>0++</sup> | Seq. | y       | y <sup>++</sup> | y <sup>*</sup> | y <sup>+++</sup> | y <sup>0</sup> | y <sup>0++</sup> | #  |
|----|---------|-----------------|----------------|------------------|------|---------|-----------------|----------------|------------------|----------------|------------------|----|
| 1  | 114.05  | 57.53           |                |                  | A    |         |                 |                |                  |                |                  | 13 |
| 2  | 185.09  | 93.05           |                |                  | A    | 1056.54 | 528.78          | 1039.52        | 520.26           | 1038.53        | 519.77           | 12 |
| 3  | 322.15  | 161.58          |                |                  | H    | 985.51  | 493.26          | 968.48         | 484.74           | 967.50         | 484.25           | 11 |
| 4  | 379.17  | 190.09          |                |                  | G    | 848.45  | 424.73          | 831.42         | 416.21           | 830.44         | 415.72           | 10 |
| 5  | 436.19  | 218.60          |                |                  | G    | 791.43  | 396.22          | 774.40         | 387.70           | 773.42         | 387.21           | 9  |
| 6  | 523.23  | 262.12          | 505.22         | 253.11           | S    | 734.40  | 367.71          | 717.38         | 359.19           | 716.39         | 358.70           | 8  |
| 7  | 594.26  | 297.64          | 576.25         | 288.63           | A    | 647.37  | 324.19          | 630.35         | 315.68           | 629.36         | 315.18           | 7  |
| 8  | 665.30  | 333.15          | 647.29         | 324.15           | A    | 576.34  | 288.67          | 559.31         | 280.16           | 558.32         | 279.67           | 6  |
| 9  | 752.33  | 376.67          | 734.32         | 367.66           | S    | 505.30  | 253.15          | 488.27         | 244.64           | 487.29         | 244.15           | 5  |
| 10 | 839.36  | 420.19          | 821.35         | 411.18           | S    | 418.27  | 209.64          | 401.24         | 201.12           | 400.26         | 200.63           | 4  |
| 11 | 910.40  | 455.70          | 892.39         | 446.70           | A    | 331.23  | 166.12          | 314.21         | 157.61           |                |                  | 3  |
| 12 | 1023.49 | 512.25          | 1005.47        | 503.24           | L    | 260.20  | 130.60          | 243.17         | 122.09           |                |                  | 2  |
| 13 |         |                 |                |                  | K    | 147.11  | 74.06           | 130.09         | 65.55            |                |                  | 1  |

Gene Symbol Sequences m/z Charge Ion score Expect  
 UPP1 AATGANAEKAESHNDPCVR 683.318 3+ 69 1.2e-05  
 (IPI00004406 Isoform 1 of Uridine phosphorylase 1)

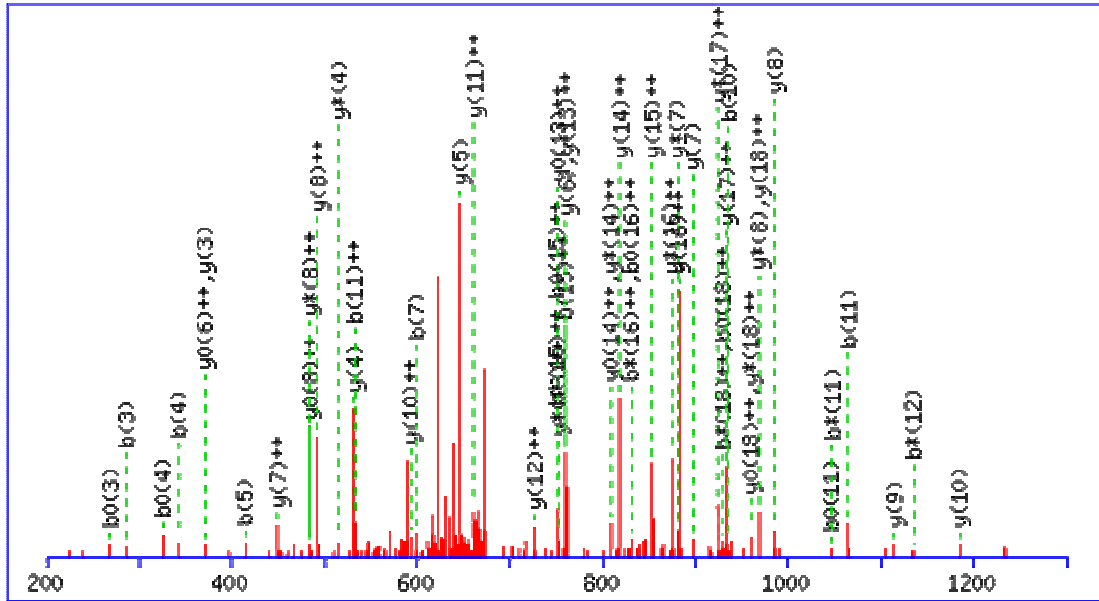

C16: Carbamidomethylated  
 N-term : N-Acetyl (Protein)  
 K9: Lysine (K-full)

| #  | b       | b <sup>++</sup> | b <sup>*</sup> | b <sup>+++</sup> | b <sup>0</sup> | b <sup>0++</sup> | Seq. | y       | y <sup>++</sup> | y <sup>*</sup> | y <sup>+++</sup> | y <sup>0</sup> | y <sup>0++</sup> | #  |
|----|---------|-----------------|----------------|------------------|----------------|------------------|------|---------|-----------------|----------------|------------------|----------------|------------------|----|
| 1  | 114.05  | 57.53           |                |                  |                |                  | A    |         |                 |                |                  |                |                  | 19 |
| 2  | 185.09  | 93.05           |                |                  |                |                  | A    | 1934.89 | 967.95          | 1917.86        | 959.43           | 1916.88        | 958.94           | 18 |
| 3  | 286.14  | 143.57          |                |                  | 268.13         | 134.57           | T    | 1863.85 | 932.43          | 1846.82        | 923.92           | 1845.84        | 923.42           | 17 |
| 4  | 343.16  | 172.08          |                |                  | 325.15         | 163.08           | G    | 1762.80 | 881.90          | 1745.78        | 873.39           | 1744.79        | 872.90           | 16 |
| 5  | 414.20  | 207.60          |                |                  | 396.19         | 198.60           | A    | 1705.78 | 853.39          | 1688.75        | 844.88           | 1687.77        | 844.39           | 15 |
| 6  | 528.24  | 264.62          | 511.21         | 256.11           | 510.23         | 255.62           | N    | 1634.74 | 817.88          | 1617.72        | 809.36           | 1616.73        | 808.87           | 14 |
| 7  | 599.28  | 300.14          | 582.25         | 291.63           | 581.27         | 291.14           | A    | 1520.70 | 760.85          | 1503.67        | 752.34           | 1502.69        | 751.85           | 13 |
| 8  | 728.32  | 364.66          | 711.29         | 356.15           | 710.31         | 355.66           | E    | 1449.66 | 725.34          | 1432.64        | 716.82           | 1431.65        | 716.33           | 12 |
| 9  | 864.43  | 432.72          | 847.40         | 424.21           | 846.42         | 423.71           | K    | 1320.62 | 660.81          | 1303.59        | 652.30           | 1302.61        | 651.81           | 11 |
| 10 | 935.47  | 468.24          | 918.44         | 459.72           | 917.46         | 459.23           | A    | 1184.51 | 592.76          | 1167.48        | 584.25           | 1166.50        | 583.75           | 10 |
| 11 | 1064.51 | 532.76          | 1047.48        | 524.25           | 1046.50        | 523.75           | E    | 1113.47 | 557.24          | 1096.45        | 548.73           | 1095.46        | 548.24           | 9  |
| 12 | 1151.54 | 576.27          | 1134.52        | 567.76           | 1133.53        | 567.27           | S    | 984.43  | 492.72          | 967.41         | 484.21           | 966.42         | 483.71           | 8  |
| 13 | 1288.60 | 644.80          | 1271.57        | 636.29           | 1270.59        | 635.80           | H    | 897.40  | 449.20          | 880.37         | 440.69           | 879.39         | 440.20           | 7  |
| 14 | 1402.64 | 701.83          | 1385.62        | 693.31           | 1384.63        | 692.82           | N    | 760.34  | 380.67          | 743.31         | 372.16           | 742.33         | 371.67           | 6  |
| 15 | 1517.67 | 759.34          | 1500.64        | 750.83           | 1499.66        | 750.33           | D    | 646.30  | 323.65          | 629.27         | 315.14           | 628.29         | 314.65           | 5  |
| 16 | 1677.70 | 839.35          | 1660.67        | 830.84           | 1659.69        | 830.35           | C    | 531.27  | 266.14          | 514.24         | 257.63           |                |                  | 4  |
| 17 | 1774.75 | 887.88          | 1757.73        | 879.37           | 1756.74        | 878.88           | P    | 371.24  | 186.12          | 354.21         | 177.61           |                |                  | 3  |
| 18 | 1873.82 | 937.41          | 1856.80        | 928.90           | 1855.81        | 928.41           | V    | 274.19  | 137.60          | 257.16         | 129.08           |                |                  | 2  |
| 19 |         |                 |                |                  |                |                  | R    | 175.12  | 88.06           | 158.09         | 79.55            |                |                  | 1  |
